# Supplementary material for: Fast identification of the stability of atomically dispersed bi-atom catalysts using a structure descriptor-based model
Source: Royal Society of Chemistry journal article supplement (doi:10.1039/d1ta08780k), 2021-12-14
Supplement: d1ta08780k1.pdf [file d1ta08780k1.pdf]

## Supplementary Information

### Fast identification of stability of atomically dispersed bi-atom catalysts by a structure descriptor-based simple model

Danyang Li, Haoxiang Xu\*, Jiqin Zhu and Dapeng Cao\*

State Key Laboratory of Organic-Inorganic Composites and Beijing Advanced Innovation Center  
for Soft Matter Science and Engineering, Beijing University of Chemical Technology, Beijing  
100029, People's Republic of China

\*Corresponding Author. E-mail: [xuhx@mail.buct.edu.cn](mailto:xuhx@mail.buct.edu.cn) and [caodp@mail.buct.edu.cn](mailto:caodp@mail.buct.edu.cn)

### Contents

|                                                                             |    |
|-----------------------------------------------------------------------------|----|
| <b>Supplementary Methods</b> .....                                          | 1  |
| Section 1. Computational methods.....                                       | 1  |
| Section 2. Stability against aggregation calculation.....                   | 2  |
| Section 3. Structure descriptor of stability against atom aggregation ..... | 3  |
| Section 4. Dissolution potential calculation .....                          | 5  |
| <b>Supplementary Tables</b> .....                                           | 7  |
| <b>Supplementary Figures</b> .....                                          | 61 |
| <b>Supplementary References</b> .....                                       | 87 |

## Supplementary Methods

### Section 1. Computational methods

All the structures relaxation were calculated by density functional theory (DFT) , as implemented in Vienna ab initio Simulation Package (VASP) 5.4 code<sup>1, 2</sup>. The exchange correlation energy was modelled by Perdew Burke-Ernzerhof (PBE) functional within the generalized gradient approximation (GGA), and the projector augmented wave (PAW) pseudo-potentials were used to describe ionic cores<sup>3, 4</sup>. The energy cutoff of 500 eV was adopted for the plane-wave basis. A Gaussian smearing of 0.02 eV to the orbital occupation was applied during the geometry optimization and for the total energy computations. The energy and force convergence thresholds for the iteration in self-consistent filed (SCF) were set to  $10^{-5}$  eV and  $0.01$  eV/Å, respectively. DFT-D3 method with Beche-Jonson damping were used in van der Waals (vdW) corrections<sup>5</sup>. We modeled bimetallic atoms doped graphene where the graphene was modeled with a  $(4 \times 3 \sqrt{3})$  supercell, and a vacuum slab of  $15 \text{Å}$  was inserted in the z direction for surface isolation to prevent interaction between two neighboring surfaces. In structural optimizations, the Brillouin zone was sampled by  $2 \times 2 \times 1$  k-points using Monkhorst-Pack scheme. We employed the DFT + U method<sup>6</sup> to correct the local 3d electron correlation through on-site Coulomb and exchange interactions. Here we followed the rotation invariant method and used the corresponding U values for different transitions in previous studies<sup>6, 7</sup>.

## Section 2. Stability against aggregation calculation

A chemical potential-based thermodynamic model developed by JinCheng Liu and his co-workers<sup>8</sup> could be used to explore the stability of SACs against metal atom aggregation. Therefore, according to this method, we obtained the chemical potentials of  $M_1M_2$ -NC and metal NP. In this model, the chemical potential of metal NP ( $\mu_{\text{NP}}(R)$ ) can be expressed by the Gibbs–Thomson (G-T) relation<sup>9</sup>,

$$\mu_{\text{NP}}(R) = 2\Omega\gamma_{\text{me}}/R \quad (1)$$

where  $\Omega$  is the molar volume of bulk metal atom. And  $\gamma_{\text{me}}$  is the surface energy of the NP, which is taken from the Materials Project<sup>10</sup>. We calculated the chemical potential of  $M_1$  and  $M_2$  atom in  $M_1M_2$ -NC, respectively. The chemical potential of metal SA can be approximately defined as the formation energy of metal SA with respect to the bulk metal ( $\mu_{\text{bulk}} = 0$ ):

$$\mu_{M_1} \approx E_{M_1M_2\text{-NC}} - E_{M_2\text{-NC}} - E_{M_1} \quad (2)$$

$$\mu_{M_2} \approx E_{M_1M_2\text{-NC}} - E_{M_1\text{-NC}} - E_{M_2} \quad (3)$$

where  $E_{M_1M_2\text{-NC}}$  is the total energy of  $M_1M_2$ -NC,  $E_{M_1/M_2}$  the energy of bulk gold energy per atom, and  $E_{M_1\text{-NC}/M_2\text{-NC}}$  the energy of  $M_1$ -NC or  $M_2$ -NC. The energy change for subtracting a metal SA from a metal NP can be estimated by the difference of the chemical potentials between metal SA and metal NP

$$\Delta E_{\text{SA}}^{\text{f}}(R) = \mu_{\text{SA}} - \mu_{\text{NP}}(R) \quad (4)$$

where  $\mu_{\text{SA}}$  is the chemical potential of  $M_1$  ( $\mu_{M_1}$ ) or  $M_2$  ( $\mu_{M_2}$ ). Here,  $\Delta E_{\text{SA}}^{\text{f}}(R) < 0$  eV generally indicates that metal SAs in  $M_1M_2$ -NC are difficult to disintegrate from the heteronuclear dimer-atom sites and aggregate into NPs.

### Section 3. Structure descriptor of stability against atom aggregation

To predict the stability of BACs against atom aggregation, we associate the  $\Delta E_{SA}^f$  with properties of metal atom, respectively. Generally, the larger atomic radius are, the more difficult they are to embed into the N<sub>6</sub>-C cavity, and a smaller the bulk cohesive energy ( $E^{\text{coh}}$ ) indicates that metal single atoms are easier to aggregate into NPs.

$$E^{\text{coh}} = E_{\text{bulk}} - n \times E_{\text{free-atom}} \quad (5)$$

where  $n$  is the number of atoms in the bulk,  $E_{\text{bulk}}$  and  $E_{\text{free-atom}}$  is the energy of the metal bulk and free atom, respectively.

Therefore, the difference of the chemical potentials between metal SA and metal NP ( $\Delta E_{SA}^f$ ) of configurations 4 is not only related to valence-electron numbers and electronegativity, but also related to atomic radius and the bulk cohesive energy ( $E^{\text{coh}}$ ). Since all  $E^{\text{coh}}$  calculated in this work are negative value, the absolute value of  $E^{\text{coh}}$  is used in subsequent calculations.

We build descriptors ( $\varphi_{\text{agg1}}$  and  $\varphi_{\text{agg2}}$ ) in this work by considering the effects of agglomerated atoms ( $M_1$  atoms) and non-agglomerated atoms ( $M_2$  atoms) in  $M_1M_2$ -NC on the  $\Delta E_{M_1}^f$ . For 3d metals atom aggregation, the descriptors ( $\varphi_{\text{agg1}}$  and  $\varphi_{\text{agg2}}$ ) of the  $M_1M_2$ -NC-4 are as follow:

$$\varphi_{\text{agg1}} = \theta_{M_1} \sqrt{E_{M_1}} + \sqrt{|E_{M_1}^{\text{coh}}|} + R_{M_1} \quad (6)$$

$$\varphi_{\text{agg2}} = E_{M_2} R_{M_2}^2 \quad (7)$$

Where  $E_{M_1/M_2}$  and  $R_{M_1/M_2}$  are the electronegativity and radius,  $\theta_{M_1}$  are the valence-electron number, and  $|E_{M_1}^{\text{coh}}|$  are the absolute value of  $E^{\text{coh}}$  for  $M_1$  atom. We have performed a quadratic fitting of the  $\Delta E_{M_1}^f$  with  $\varphi_{\text{agg1}}$  and  $\varphi_{\text{agg2}}$ , the formula is as follows:

$$\Delta E_{SA}^f = -21.68 - 1.69\varphi_{\text{agg1}} + 15.62\varphi_{\text{agg2}} + 0.063(\varphi_{\text{agg1}})^2 - 2.05(\varphi_{\text{agg2}})^2 + 0.0005\varphi_{\text{agg1}}\varphi_{\text{agg2}} \quad (8)$$

$$\Delta E_{SA}^f = 16.23 - 2.05\varphi_{agg1} - 2.00\varphi_{agg2} + 0.07(\varphi_{agg1})^2 + 0.149(\varphi_{agg2})^2 + 0.0287\varphi_{agg1}\varphi_{agg2} \quad (9)$$

Eq 8 and eq 9 apply to 3d-3d and 3d-4d/5d  $M_1M_2$ -NC respectively. The  $\Delta E_{M_1}^f$  is as a function of both the  $\varphi_{agg1}$  and  $\varphi_{agg2}$  in **Figure S16**. At this time, the  $\Delta E_{SA}^f$  is mainly related to properties of agglomerate atom. As is shown in **Figure S16**, a smaller value of  $\varphi_{agg1}$  generally indicates that  $M_1$  metal atom are more difficult to aggregate into NPs. Compared with 3d metals,  $M_2$  atoms of 4d and 5d metals have stronger adsorption capacity for  $M_1$  atoms.

For 4d metals atom aggregation, the  $\Delta E_{SA}^f$  is also mainly related to properties of agglomerate atom. However, atomic radius and  $E^{coh}$  of agglomerate atom have a greater impact on  $\Delta E_{SA}^f$ . Thus, the  $\varphi_{agg1}$  of the  $M_1M_2$ -NC-4 are as follow:

$$\varphi_{agg1} = \theta_{M_1} + |E_{M_1}^{coh}| + R_{M_1}^n \quad (10)$$

The quadratic fitting of the  $\Delta E_{M_1}^f$  with  $\varphi_{agg1}$  and  $\varphi_{agg2}$  are performed, the formula is as follows:

$$\begin{aligned} \Delta E_{SA}^f &= -14.30 - 1.52\varphi_{agg1} + 18.28\varphi_{agg2} + 0.03(\varphi_{agg1})^2 - 2.12(\varphi_{agg2})^2 - 0.088\varphi_{agg1}\varphi_{agg2} \quad (4d - 4) \end{aligned} \quad (11)$$

$$\begin{aligned} \Delta E_{SA}^f &= -6.28 + 0.89\varphi_{agg1} - 0.225\varphi_{agg2} - 0.026(\varphi_{agg1})^2 + 0.057(\varphi_{agg2})^2 - 0.009\varphi_{agg1}\varphi_{agg2} \quad (4d - 4) \end{aligned} \quad (12)$$

The  $\Delta E_{M_1}^f$  is as a function of both the  $\varphi_{agg1}$  and  $\varphi_{agg2}$  in **Figure S17**. For 5d metal atom aggregation, the influence of  $M_2$  atom for  $\Delta E_{M_1}^f$  increases, as they usually have a larger atomic radius, and thus the  $\varphi_{agg2}$  of the  $M_1M_2$ -NC-4 are as follow:

$$\varphi_{agg2} = E_{M_2} R_{M_2}^5 \quad (13)$$

Noteworthy, we found that the  $\varphi_{agg1}$  is different with the difference of  $M_2$  atom in  $M_1M_2$ -NC. When  $M_2$  atoms are 7~9 group transition metal atom, the  $\varphi_{agg1}$  is as follow:

$$\varphi_{agg1} = \sqrt{E_{M_1}^f \theta_{M_1}} + |E_{M_1}^{coh}| + R_{M_1}^n \quad (14)$$

In the contrast, when  $M_2$  atoms are 10~12 group transition metal atom, the  $\varphi_{agg1}$  is as follow:

$$\varphi_{agg1} = \theta_{M_1} + |E_{M_1}^{coh}| + R_{M_1} \quad (15)$$

The quadratic fitting of the  $\Delta E_{SA}^f$  with  $\varphi_{agg1}$  and  $\varphi_{agg2}$  will be performed as follows:

$$\Delta E_{SA}^f = Z_0 + a\varphi_{agg1} - b\varphi_{agg2} - c(\varphi_{agg1})^2 + d(\varphi_{agg2})^2 - f\varphi_{agg1}\varphi_{agg2} \quad (16)$$

The data of  $Z_0$ ,  $a$ ,  $b$ ,  $c$ ,  $d$  and  $f$  are listed in **Table S29**, and the dissolution potential of  $M_1$  in **Figure S18** are as a function of both the  $\varphi_{agg1}$  and  $\varphi_{agg2}$ . According to our forecasting model, the  $M_1M_2$ -NC obtained from experiments are predicted to be stable against metal atom aggregation ( $\Delta E_{SA}^f < 0$ ), as is shown in **Figure S16-S18**. This result validates our prediction.

#### Section 4. Dissolution potential calculation

A simple scheme formulated by Jincheng Liu and his colleagues<sup>11</sup> was used to calculate dissolution potential of BACs, in which the leaching process is investigated with differential leaching steps.

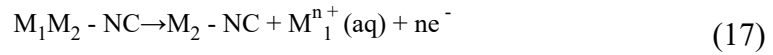

Most transition metal atoms (except Ag, Re and Ir) which was calculated in this work will lose two electrons to form divalent metal ions. Thus the corresponding reaction free energies at a certain applied potential  $U$  can be written as,

$$\Delta G_{(M_1M_2 - NC \text{ to } M_2 - NC)} = G_{(M_2 - NC)} + G_{(M_1^{n+} (aq))} - G_{(M_1M_2 - NC)} + neU \quad (18)$$

Where  $e$  is -1 and the free energies of solvated cations  $G_{(M_1^{n+} (aq))}$  is calculated from the experimental standard reduction potentials  $U_0$  (vs SHE) and the free energies of

bulk metals  $E_{(M(s))}$  as follows:

$$G_{(M^{n+}(aq))} = G_{(M(s))} - neU_0 \quad (19)$$

The free energies  $G_{(M_1M_2-NC)}$  and  $G_{(M_2-NC)}$  are linearly dependent on U as follow,

$$G_{(M_1M_2-NC)} = k_1U + G^0_{(M_1M_2-NC)} \quad (20)$$

$$G_{(M_2-NC)} = k_2U + G^0_{(M_2-NC)} \quad (21)$$

where k is the linear coefficient for U dependence, and  $G^0$  is the free energy at U = 0 V.

$$\Delta G_{M_1} = G^0_{(M_2-NC)} + G_{(M_1^{n+}(aq))} - G^0_{(M_1M_2-NC)} + (k_2 - k_1 + n)eU \quad (22)$$

It requires  $\Delta G_{M_1} < 0$  for the leaching step to take place spontaneously, and thus the dissolution potential U for BACs is

$$U = \frac{G^0_{(M_2-NC)} + G_{(M_1^{n+}(aq))} - G^0_{(M_1M_2-NC)}}{k_2 - k_1 + n} \quad (23)$$

We further assume  $k_1=k_2$ , and consequently we write eq 11 in the form

$$U = \frac{G^0_{(M_2-NC)} + G_{(M_1^{n+}(aq))} - G^0_{(M_1M_2-NC)}}{n} \quad (24)$$

In alkaline conditions, the leached metal ions may be converted into hydroxides or oxide in the solution. Taking the hydroxides as an example, the reaction equation for dissolution is

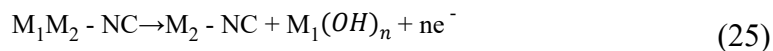

According to the calculation result of DFT studies by Pourbaix et al<sup>12</sup>, the dissolved product and the energy of metal bulk converted into hydroxide is determined.

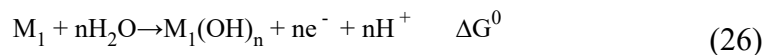

The corresponding reaction free energies at a certain applied potential U can be written as,

$$\Delta G_{M_1} = G^0_{(M_2-NC)} + G_{(M_1(s))} - G^0_{(M_1M_2-NC)} + neU + \Delta G^0 \quad (27)$$

It requires  $\Delta G_{M_1} < 0$  for the leaching step to take place spontaneously, and thus the dissolution potential U (vs SHE) for BACs is

$$U_{SHE} = \frac{G^0_{(M_2-NC)} + G_{(M_1(S))} - G^0_{(M_1M_2-NC)} + \Delta G^0}{n} \quad (28)$$

The dissolution potential U (vs RHE) for BACs is

$$U_{RHE} = U_{SHE} + 0.0591 \times \text{pH} \quad (29)$$



## Supplementary Tables

**Table S1** The adsorption energies ( $E_{ad}$ ) in eV for 3d-3d heteronuclear BACs.

| $M_1, M_2$  | $M_1M_2$ -NC-1 | $M_1M_2$ -NC-2 | $M_1M_2$ -NC-3 | $M_1M_2$ -NC-4 | $M_1M_2$ -NC-5 |
|-------------|----------------|----------------|----------------|----------------|----------------|
| <b>NiCo</b> | -1.75          | -5.41          | -0.87          | -6.05          | -2.64          |
| <b>CuNi</b> | -2.36          | -5.21          | -1.30          | -5.58          | -3.04          |
| <b>CuCo</b> | -2.36          | -5.27          | -1.05          | -5.50          | -2.73          |
| <b>NiFe</b> | -1.29          | -5.01          | -0.22          | -5.89          | -2.85          |
| <b>FeCo</b> | -1.15          | -5.05          | 0.22           | -5.87          | -2.46          |
| <b>FeCu</b> | -2.03          | -4.88          | -0.36          | -5.31          | -3.06          |
| <b>NiZn</b> | -0.83          | -4.04          | 0.85           | -4.14          | -2.39          |
| <b>ZnCo</b> | -0.62          | -4.16          | 1.38           | -4.00          | -1.68          |
| <b>CuZn</b> | -1.61          | -4.01          | 0.20           | -3.90          | -2.31          |
| <b>NiMn</b> | -0.43          | -3.97          | 0.96           | -4.80          | -1.73          |
| <b>MnCo</b> | 0.33           | -3.99          | 1.46           | -4.82          | -1.15          |
| <b>CuMn</b> | -0.88          | -3.94          | 0.64           | -4.31          | -2.01          |
| <b>ZnFe</b> | -0.11          | -3.78          | 1.62           | -3.93          | -1.74          |
| <b>MnFe</b> | 0.58           | -3.56          | 2.18           | -4.30          | -0.48          |
| <b>ZnMn</b> | 1.03           | -2.85          | 2.52           | -2.83          | 1.17           |

**Table S2** The adsorption energies ( $E_{ad}$ ) in eV for 3d-3d homonuclear BACs and SACs. The adsorption energy of  $2M_1/2M_2$ -NC is the average of the adsorption energy of  $2M_1$ -NC and  $2M_2$ -NC.

| $M_1, M_2$  | $2M_1/2M_2$ - | $M_1M_2$ -SAC |
|-------------|---------------|---------------|---------------|---------------|---------------|---------------|
|             | NC-1          | NC-2          | NC-3          | NC-4          | NC-5          |               |
| <b>Mn</b>   | 1.79          | -2.21         | 3.60          | -2.79         | 0.72          | -1.57         |
| <b>Fe</b>   | -0.53         | -4.61         | 0.97          | -5.50         | -2.14         | -4.70         |
| <b>Co</b>   | -1.53         | -5.44         | -0.35         | -6.07         | -2.69         | -5.56         |
| <b>Ni</b>   | -1.81         | -5.43         | -1.12         | -6.20         | -2.78         | -5.58         |
| <b>Cu</b>   | -2.90         | -5.08         | -1.54         | -5.32         | -2.53         | -5.01         |
| <b>Zn</b>   | 0.32          | -2.91         | 2.06          | -2.14         | -1.43         | -2.67         |
| <b>NiCo</b> | -1.67         | -5.44         | -0.74         | -6.14         | -2.74         | -5.58         |
| <b>CuNi</b> | -2.35         | -5.26         | -1.33         | -5.76         | -2.66         | -5.30         |
| <b>CuCo</b> | -2.21         | -5.26         | -0.95         | -5.69         | -2.61         | -5.29         |
| <b>NiFe</b> | -1.17         | -5.02         | -0.07         | -5.85         | -2.46         | -5.15         |
| <b>FeCo</b> | -1.03         | -5.03         | 0.31          | -5.79         | -2.41         | -5.14         |
| <b>FeCu</b> | -1.71         | -4.85         | -0.28         | -5.41         | -2.34         | -4.83         |
| <b>NiZn</b> | -0.74         | -4.17         | 0.47          | -4.17         | -2.10         | -4.13         |
| <b>ZnCo</b> | -0.60         | -4.17         | 0.85          | -4.11         | -2.06         | -4.13         |
| <b>CuZn</b> | -1.29         | -3.99         | 0.26          | -3.73         | -1.98         | -3.85         |
| <b>NiMn</b> | -0.01         | -3.82         | 1.24          | -4.49         | -1.03         | -3.58         |
| <b>MnCo</b> | 0.13          | -3.82         | 1.62          | -4.43         | -0.99         | -3.56         |
| <b>CuMn</b> | -0.55         | -3.64         | 1.03          | -4.05         | -0.91         | -3.32         |
| <b>ZnFe</b> | -0.10         | -3.76         | 1.52          | -3.82         | -1.78         | -3.29         |
| <b>MnFe</b> | 0.63          | -3.41         | 2.29          | -4.15         | -0.71         | -3.05         |
| <b>ZnMn</b> | 1.06          | -2.56         | 2.83          | -2.46         | -0.35         | -2.16         |

**Table S3** The adsorption energies ( $E_{ad}$ ) in eV for 3d-4d heteronuclear BACs, homonuclear BACs and SACs. The adsorption energy of  $2M_1/2M_2$ -NC is the average of the adsorption energy of  $2M_1$ -NC and  $2M_2$ -NC.

| $M_1, M_2$  | $M_1M_2$ -NC-2 | $M_1M_2$ -NC-4 | $2M_1/2M_2$ -NC-2 | $2M_1/2M_2$ -NC-4 | $M_1M_2$ -SAC |
|-------------|----------------|----------------|-------------------|-------------------|---------------|
| <b>PdCo</b> | -6.75          | -6.78          | -6.68             | -6.80             | -6.72         |
| <b>PdNi</b> | -6.73          | -6.83          | -6.67             | -6.86             | -6.70         |
| <b>PdCu</b> | -6.53          | -6.43          | -6.50             | -6.42             | -6.44         |
| <b>PdFe</b> | -6.34          | -6.80          | -6.26             | -6.51             | -6.29         |
| <b>RhCo</b> | -5.74          | -6.76          | -5.78             | -6.90             | -5.66         |
| <b>RhNi</b> | -5.85          | -6.33          | -5.77             | -6.96             | -5.43         |
| <b>RhCu</b> | -5.58          | -5.86          | -5.60             | -6.52             | -5.38         |
| <b>PdZn</b> | -5.40          | -5.04          | -5.41             | -4.83             | -5.29         |
| <b>PdMn</b> | -5.29          | -5.69          | -5.06             | -5.16             | -4.73         |
| <b>RhFe</b> | -5.36          | -6.49          | -5.36             | -6.61             | -4.64         |
| <b>RuCo</b> | -4.33          | -6.39          | -4.66             | -6.47             | -4.23         |
| <b>RhZn</b> | -4.45          | -4.38          | -4.51             | -4.93             | -4.22         |
| <b>RuNi</b> | -4.41          | -6.04          | -4.65             | -6.53             | -4.20         |
| <b>RuCu</b> | -4.33          | -5.56          | -4.48             | -6.09             | -3.96         |
| <b>RuFe</b> | -3.97          | -6.15          | -4.24             | -6.18             | -3.80         |
| <b>TcNi</b> | -4.26          | -6.26          | -4.11             | -6.64             | -3.74         |
| <b>TcCo</b> | -4.28          | -6.54          | -4.12             | -6.58             | -3.71         |
| <b>RhMn</b> | -4.24          | -5.59          | -4.16             | -5.26             | -3.65         |
| <b>TcCu</b> | -4.38          | -5.82          | -3.94             | -6.20             | -3.49         |
| <b>TcFe</b> | -3.76          | -6.15          | -3.71             | -6.29             | -3.38         |
| <b>AgNi</b> | -3.78          | -4.04          | -3.83             | -4.24             | -3.18         |
| <b>AgCo</b> | -3.84          | -3.96          | -3.84             | -4.18             | -3.13         |
| <b>AgCu</b> | -3.68          | -3.74          | -3.66             | -3.80             | -2.96         |

|             |       |       |       |       |       |
|-------------|-------|-------|-------|-------|-------|
| <b>AgFe</b> | -3.51 | -3.73 | -3.42 | -3.89 | -2.69 |
| <b>RuZn</b> | -3.13 | -4.17 | -3.39 | -4.50 | -2.68 |
| <b>CdNi</b> | -2.83 | -2.48 | -3.14 | -3.25 | -2.65 |
| <b>CdCo</b> | -2.90 | -2.43 | -3.15 | -3.18 | -2.64 |
| <b>CdCu</b> | -2.43 | -2.31 | -2.97 | -2.81 | -2.36 |
| <b>TcZn</b> | -3.17 | -4.50 | -2.85 | -4.61 | -2.35 |
| <b>RuMn</b> | -2.84 | -4.95 | -3.04 | -4.83 | -2.22 |
| <b>CdFe</b> | -2.61 | -2.44 | -2.73 | -2.90 | -2.17 |
| <b>TcMn</b> | -2.63 | -5.11 | -2.50 | -4.93 | -1.79 |
| <b>AgZn</b> | -2.60 | -2.39 | -2.57 | -2.21 | -1.76 |
| <b>AgMn</b> | -2.45 | -2.71 | -2.22 | -2.54 | -1.17 |
| <b>CdZn</b> | -1.86 | -0.83 | -1.88 | -1.22 | -1.17 |
| <b>CdMn</b> | -1.71 | -1.46 | -1.53 | -1.54 | -0.60 |

**Table S4** The adsorption energies ( $E_{ad}$ ) in eV for 3d-5d heteronuclear BACs, homonuclear BACs and SACs. The adsorption energy of  $2M_1/2M_2$ -NC is the average of the adsorption energy of  $2M_1$ -NC and  $2M_2$ -NC.

| $M_1, M_2$  | $M_1M_2$ -NC-2 | $M_1M_2$ -NC-4 | $2M_1/2M_2$ -NC-2 | $2M_1/2M_2$ -NC-4 | $M_1M_2$ -SAC |
|-------------|----------------|----------------|-------------------|-------------------|---------------|
| <b>IrCo</b> | -7.68          | -8.65          | -7.59             | -8.72             | -7.48         |
| <b>IrNi</b> | -7.69          | -8.12          | -7.59             | -8.78             | -7.46         |
| <b>PtCo</b> | -7.44          | -7.46          | -7.35             | -7.36             | -7.41         |
| <b>PtNi</b> | -7.46          | -7.49          | -7.34             | -7.42             | -7.39         |
| <b>IrCu</b> | -7.48          | -7.63          | -7.41             | -8.34             | -7.21         |
| <b>PtCu</b> | -7.24          | -7.05          | -7.17             | -6.98             | -7.15         |
| <b>IrFe</b> | -7.35          | -8.53          | -7.18             | -8.43             | -7.05         |
| <b>PtFe</b> | -6.79          | -7.42          | -6.93             | -7.07             | -7.00         |
| <b>IrZn</b> | -6.31          | -6.28          | -6.32             | -6.75             | -6.06         |
| <b>PtZn</b> | -6.12          | -5.69          | -6.08             | -5.39             | -6.00         |
| <b>IrMn</b> | -5.99          | -7.47          | -5.97             | -7.08             | -5.48         |

|             |       |       |       |       |       |
|-------------|-------|-------|-------|-------|-------|
| <b>PtMn</b> | -5.96 | -6.33 | -5.73 | -5.72 | -5.45 |
| <b>OsCo</b> | -4.55 | -6.70 | -4.68 | -6.74 | -4.24 |
| <b>OsNi</b> | -4.62 | -6.27 | -4.67 | -6.80 | -4.03 |
| <b>OsCu</b> | -4.47 | -5.81 | -4.50 | -6.36 | -3.98 |
| <b>OsFe</b> | -4.02 | -6.44 | -4.27 | -6.45 | -3.81 |
| <b>ReCo</b> | -3.40 | -6.15 | -3.47 | -6.08 | -2.79 |
| <b>ReNi</b> | -3.38 | -5.77 | -3.46 | -6.14 | -2.75 |
| <b>OsZn</b> | -3.16 | -4.53 | -3.41 | -4.77 | -2.63 |
| <b>ReCu</b> | -3.50 | -5.35 | -3.29 | -5.70 | -2.51 |
| <b>ReFe</b> | -2.98 | -5.75 | -3.05 | -5.79 | -2.39 |
| <b>OsMn</b> | -2.58 | -5.31 | -3.06 | -5.10 | -2.23 |
| <b>ReZn</b> | -2.31 | -4.12 | -2.20 | -4.11 | -1.38 |
| <b>ReMn</b> | -1.72 | -4.71 | -1.85 | -4.43 | -0.79 |

**Table S5** The adsorption energies ( $E_{ad}$ ) in eV for 4d-4d heteronuclear BACs, homonuclear BACs and SACs. The adsorption energy of  $2M_1/2M_2$ -NC is the average of the adsorption energy of  $2M_1$ -NC and  $2M_2$ -NC.

| $M_1, M_2$  | $M_1M_2$ -NC-2 | $M_1M_2$ -NC-4 | $2M_1/2M_2$ -NC-2 | $2M_1/2M_2$ -NC-4 | $M_1M_2$ -SAC |
|-------------|----------------|----------------|-------------------|-------------------|---------------|
| <b>Tc</b>   |                |                | -2.80             | -7.08             | -2.06         |
| <b>Ru</b>   |                |                | -3.87             | -6.87             | -2.89         |
| <b>Rh</b>   |                |                | -6.11             | -7.72             | -5.84         |
| <b>Pd</b>   |                |                | -7.92             | -7.53             | -7.89         |
| <b>Ag</b>   |                |                | -2.24             | -2.28             | -0.90         |
| <b>Cd</b>   |                |                | -0.85             | -0.30             | 0.69          |
| <b>RhPd</b> | -7.13          | -7.19          | -7.02             | -7.62             | -6.83         |
| <b>TcPd</b> | -5.52          | -7.28          | -5.36             | -7.30             | -5.95         |
| <b>PdRu</b> | -5.78          | -7.08          | -5.90             | -7.20             | -5.42         |
| <b>AgPd</b> | -5.11          | -4.78          | -5.08             | -4.91             | -4.39         |
| <b>RhRu</b> | -4.96          | -7.30          | -4.99             | -7.30             | -4.37         |

|             |       |       |       |       |       |
|-------------|-------|-------|-------|-------|-------|
| <b>TcRh</b> | -4.79 | -7.47 | -4.46 | -7.40 | -3.79 |
| <b>CdPd</b> | -4.06 | -3.46 | -4.38 | -3.91 | -3.79 |
| <b>AgRh</b> | -4.20 | -3.93 | -4.18 | -5.00 | -3.48 |
| <b>CdRh</b> | -3.26 | -3.35 | -3.48 | -4.01 | -2.73 |
| <b>TcAg</b> | -3.02 | -4.75 | -2.52 | -4.68 | -2.51 |
| <b>TcRu</b> | -3.81 | -7.07 | -3.34 | -6.97 | -2.41 |
| <b>AgRu</b> | -3.09 | -4.40 | -3.06 | -4.58 | -2.07 |
| <b>CdRu</b> | -2.10 | -3.56 | -2.36 | -3.58 | -1.26 |
| <b>TcCd</b> | -2.03 | -3.96 | -1.82 | -3.69 | -0.85 |
| <b>CdAg</b> | -1.71 | -0.90 | -1.54 | -1.29 | -0.27 |

**Table S6** The adsorption energies ( $E_{ad}$ ) in eV for 4d-5d heteronuclear BACs, homonuclear BACs and SACs. The adsorption energy of  $2M_1/2M_2$ -NC is the average of the adsorption energy of  $2M_1$ -NC and  $2M_2$ -NC.

| $M_1, M_2$  | $M_1M_2$ -NC-2 | $M_1M_2$ -NC-4 | $2M_1/2M_2$ -NC-2 | $2M_1/2M_2$ -NC-4 | $M_1M_2$ -SAC |
|-------------|----------------|----------------|-------------------|-------------------|---------------|
| <b>PdPt</b> | -8.57          | -8.11          | -8.59             | -8.09             | -8.60         |
| <b>RhIr</b> | -7.98          | -9.56          | -7.93             | -9.54             | -7.66         |
| <b>TcPt</b> | -6.18          | -7.89          | -6.03             | -7.86             | -5.65         |
| <b>TcIr</b> | -6.50          | -9.33          | -6.27             | -9.22             | -5.64         |
| <b>OsRh</b> | -4.90          | -7.56          | -5.02             | -7.56             | -4.25         |
| <b>RhPt</b> | -7.74          | -7.78          | -7.68             | -8.18             | -7.54         |
| <b>RuIr</b> | -6.67          | -9.17          | -6.81             | -9.12             | -6.11         |
| <b>RuPt</b> | -6.42          | -7.68          | -6.56             | -7.76             | -6.13         |
| <b>TcOs</b> | -3.86          | -7.30          | -3.36             | -7.24             | -2.41         |
| <b>OsPd</b> | -5.80          | -7.25          | -5.92             | -7.47             | -5.23         |
| <b>PdIr</b> | -8.94          | -8.91          | -8.83             | -9.44             | -8.66         |
| <b>OsRu</b> | -3.88          | -7.15          | -3.90             | -7.14             | -2.89         |
| <b>ReRh</b> | -3.92          | -7.09          | -3.80             | -6.90             | -2.82         |
| <b>RePd</b> | -4.62          | -6.76          | -4.70             | -6.80             | -3.96         |

|             |       |       |       |       |       |
|-------------|-------|-------|-------|-------|-------|
| <b>ReRu</b> | -3.01 | -6.53 | -2.68 | -6.47 | -1.46 |
| <b>ReTc</b> | -2.73 | -6.58 | -2.14 | -6.58 | -0.41 |
| <b>ReAg</b> | -2.26 | -4.52 | -1.86 | -4.18 | -0.53 |
| <b>OsAg</b> | -3.28 | -4.90 | -3.08 | -4.85 | -2.03 |
| <b>AgIr</b> | -6.03 | -6.55 | -5.99 | -6.82 | -5.28 |
| <b>AgPt</b> | -5.80 | -5.31 | -5.75 | -5.46 | -5.11 |
| <b>ReCd</b> | -1.35 | -3.61 | -1.17 | -3.19 | 0.09  |
| <b>CdOs</b> | -2.12 | -3.96 | -2.38 | -3.85 | -1.26 |
| <b>CdIr</b> | -5.04 | -5.35 | -5.29 | -5.83 | -4.57 |
| <b>CdPt</b> | -4.81 | -4.14 | -5.05 | -4.47 | -4.06 |

**Table S7** The adsorption energies ( $E_{\text{ad}}$ ) in eV for 5d-5d heteronuclear BACs, homonuclear BACs and SACs. The adsorption energy of  $2M_1/2M_2\text{-NC}$  is the average of the adsorption energy of  $2M_1\text{-NC}$  and  $2M_2\text{-NC}$ .

| $M_1, M_2$  | $M_1M_2\text{-NC-2}$ | $M_1M_2\text{-NC-4}$ | $2M_1/2M_2\text{-NC-2}$ | $2M_1/2M_2\text{-NC-4}$ | $M_1M_2\text{-SAC}$ |
|-------------|----------------------|----------------------|-------------------------|-------------------------|---------------------|
| <b>Re</b>   |                      |                      | -1.49                   | -6.08                   | -0.08               |
| <b>Os</b>   |                      |                      | -3.92                   | -7.41                   | -2.75               |
| <b>Ir</b>   |                      |                      | -9.74                   | -11.36                  | -9.48               |
| <b>Pt</b>   |                      |                      | -9.25                   | -8.64                   | -9.32               |
| <b>PtIr</b> | -9.60                | -9.49                | -9.50                   | -10.00                  | -9.37               |
| <b>OsPt</b> | -6.44                | -7.81                | -6.59                   | -8.03                   | -6.13               |
| <b>OsIr</b> | -6.58                | -9.38                | -6.83                   | -9.38                   | -6.10               |
| <b>RePt</b> | -5.19                | -7.34                | -5.37                   | -7.36                   | -4.68               |
| <b>ReIr</b> | -5.78                | -8.95                | -5.61                   | -8.72                   | -4.66               |
| <b>ReOs</b> | -3.02                | -6.71                | -2.70                   | -6.74                   | -1.38               |

**Table S8** The difference of adsorption energies of the metal atom between  $M_1M_2$ -NC and  $M_1M_2$ -SAC ( $\Delta E_{\text{ad(SAC)}}$ ) in eV for 3d-3d  $M_1M_2$ -NC. The BACs possess instability against forming single-atom sites are marked in red.

|                | <b>configurations 2</b> | <b>configurations 4</b> |
|----------------|-------------------------|-------------------------|
| <b>2Mn-NC</b>  | -0.63                   | -1.22                   |
| <b>2Fe-NC</b>  | <b>0.09</b>             | -0.80                   |
| <b>2Co-NC</b>  | <b>0.12</b>             | -0.51                   |
| <b>2Ni-NC</b>  | <b>0.16</b>             | -0.61                   |
| <b>2Cu-NC</b>  | -0.07                   | -0.30                   |
| <b>2Zn-NC</b>  | -0.24                   | <b>0.53</b>             |
| <b>NiFe-NC</b> | <b>0.14</b>             | -0.74                   |
| <b>NiCo-NC</b> | <b>0.17</b>             | -0.47                   |
| <b>FeCo-NC</b> | <b>0.08</b>             | -0.74                   |
| <b>CuNi-NC</b> | <b>0.10</b>             | -0.28                   |
| <b>FeCu-NC</b> | -0.05                   | -0.48                   |
| <b>MnFe-NC</b> | -0.51                   | -1.25                   |
| <b>CuCo-NC</b> | <b>0.02</b>             | -0.21                   |
| <b>NiMn-NC</b> | -0.39                   | -1.22                   |
| <b>ZnFe-NC</b> | -0.50                   | -0.64                   |
| <b>MnCo-NC</b> | -0.43                   | -1.26                   |
| <b>CuMn-NC</b> | -0.62                   | -0.99                   |
| <b>NiZn-NC</b> | <b>0.09</b>             | -0.01                   |
| <b>CuZn-NC</b> | -0.16                   | -0.05                   |
| <b>ZnMn-NC</b> | -0.69                   | -0.67                   |
| <b>ZnCo-NC</b> | -0.03                   | <b>0.13</b>             |



**Table S9** The difference of adsorption energies of the metal atom between  $M_1M_2$ -NC and  $M_1M_2$ -SAC ( $\Delta E_{\text{ad(SAC)}}$ ) in eV for 3d-4d  $M_1M_2$ -NC. The BACs possess instability against forming single-atom sites are marked in red.

|                | <b>configurations 2</b> | <b>configurations 4</b> |
|----------------|-------------------------|-------------------------|
| <b>PdNi-NC</b> | -0.03                   | -0.13                   |
| <b>PdFe-NC</b> | -0.04                   | -0.50                   |
| <b>PdCo-NC</b> | -0.03                   | -0.06                   |
| <b>RhCo-NC</b> | -0.08                   | -1.10                   |
| <b>PdCu-NC</b> | -0.08                   | <b>0.02</b>             |
| <b>AgFe-NC</b> | -0.82                   | -1.03                   |
| <b>RhFe-NC</b> | -0.72                   | -1.86                   |
| <b>RuCo-NC</b> | -0.10                   | -2.16                   |
| <b>TcCo-NC</b> | -0.56                   | -2.82                   |
| <b>RhNi-NC</b> | -0.43                   | -0.91                   |
| <b>AgNi-NC</b> | -0.60                   | -0.86                   |
| <b>RuFe-NC</b> | -0.17                   | -2.35                   |
| <b>RuNi-NC</b> | -0.21                   | -1.84                   |
| <b>TcNi-NC</b> | -0.52                   | -2.52                   |
| <b>TcFe-NC</b> | -0.38                   | -2.77                   |
| <b>AgCu-NC</b> | -0.71                   | -0.78                   |
| <b>RhCu-NC</b> | -0.20                   | -0.48                   |
| <b>PdMn-NC</b> | -0.55                   | -0.96                   |
| <b>AgCo-NC</b> | -0.71                   | -0.83                   |
| <b>TcCu-NC</b> | -0.89                   | -2.33                   |
| <b>RuCu-NC</b> | -0.36                   | -1.59                   |
| <b>RhMn-NC</b> | -0.59                   | -1.94                   |
| <b>AgMn-NC</b> | -1.28                   | -1.54                   |
| <b>AgZn-NC</b> | -0.84                   | -0.63                   |

|                |       |             |
|----------------|-------|-------------|
| <b>PdZn-NC</b> | -0.12 | <b>0.25</b> |
| <b>RuMn-NC</b> | -0.62 | -2.73       |
| <b>TcMn-NC</b> | -0.84 | -3.32       |
| <b>CdFe-NC</b> | -0.44 | -0.26       |
| <b>RhZn-NC</b> | -0.22 | -0.16       |
| <b>TcZn-NC</b> | -0.82 | -2.15       |
| <b>CdZn-NC</b> | -0.68 | <b>0.34</b> |
| <b>RuZn-NC</b> | -0.45 | -1.50       |
| <b>CdNi-NC</b> | -0.18 | <b>0.17</b> |
| <b>CdCu-NC</b> | -0.07 | <b>0.05</b> |
| <b>CdMn-NC</b> | -1.12 | -0.87       |
| <b>CdCo-NC</b> | -0.26 | <b>0.20</b> |

**Table S10** The difference of adsorption energies of the metal atom between  $M_1M_2$ -NC and  $M_1M_2$ -SAC ( $\Delta E_{\text{ad(SAC)}}$ ) in eV for 3d-5d  $M_1M_2$ -NC. The BACs possess instability against forming single-atom sites are marked in red.

|                | <b>configurations 2</b> | <b>configurations 4</b> |
|----------------|-------------------------|-------------------------|
| <b>IrCo-NC</b> | -0.20                   | -1.17                   |
| <b>IrNi-NC</b> | -0.23                   | -0.66                   |
| <b>PtCo-NC</b> | -0.03                   | -0.05                   |
| <b>PtNi-NC</b> | -0.06                   | -0.09                   |
| <b>IrCu-NC</b> | -0.27                   | -0.42                   |
| <b>PtCu-NC</b> | -0.09                   | <b>0.10</b>             |
| <b>IrFe-NC</b> | -0.29                   | -1.48                   |
| <b>PtFe-NC</b> | <b>0.21</b>             | -0.41                   |
| <b>IrZn-NC</b> | -0.24                   | -0.18                   |
| <b>PtZn-NC</b> | -0.12                   | <b>0.31</b>             |
| <b>IrMn-NC</b> | -0.51                   | -1.99                   |
| <b>PtMn-NC</b> | -0.51                   | -0.88                   |

|                |       |       |
|----------------|-------|-------|
| <b>OsCo-NC</b> | -0.31 | -2.47 |
| <b>OsNi-NC</b> | -0.59 | -2.24 |
| <b>OsCu-NC</b> | -0.49 | -1.83 |
| <b>OsFe-NC</b> | -0.21 | -2.63 |
| <b>ReCo-NC</b> | -0.61 | -3.36 |
| <b>ReNi-NC</b> | -0.63 | -3.02 |
| <b>OsZn-NC</b> | -0.52 | -1.90 |
| <b>ReCu-NC</b> | -0.99 | -2.84 |
| <b>ReFe-NC</b> | -0.59 | -3.36 |
| <b>OsMn-NC</b> | -0.35 | -3.08 |
| <b>ReZn-NC</b> | -0.93 | -2.74 |
| <b>ReMn-NC</b> | -0.93 | -3.91 |

**Table S11** The difference of adsorption energies of the metal atom between  $M_1M_2$ -NC and  $M_1M_2$ -SAC ( $\Delta E_{\text{ad(SAC)}}$ ) in eV for 4d-4d  $M_1M_2$ -NC. The BACs possess instability against forming single-atom sites are marked in red.

|                | <b>configurations 2</b> | <b>configurations 4</b> |
|----------------|-------------------------|-------------------------|
| <b>2Tc-NC</b>  | -0.74                   | -5.02                   |
| <b>2Ru-NC</b>  | -0.99                   | -3.98                   |
| <b>2Rh-NC</b>  | -0.28                   | -1.89                   |
| <b>2Pd-NC</b>  | -0.03                   | <b>0.36</b>             |
| <b>2Ag-NC</b>  | -1.34                   | -1.39                   |
| <b>2Cd-NC</b>  | -1.53                   | -0.98                   |
| <b>RhPd-NC</b> | -0.31                   | -0.37                   |
| <b>TcPd-NC</b> | -0.58                   | -2.35                   |
| <b>PdRu-NC</b> | -0.36                   | -1.66                   |
| <b>AgPd-NC</b> | -0.73                   | -0.40                   |
| <b>RhRu-NC</b> | -0.59                   | -2.93                   |
| <b>TcRh-NC</b> | -0.99                   | -3.68                   |

|                |       |             |
|----------------|-------|-------------|
| <b>CdPd-NC</b> | -0.27 | <b>0.33</b> |
| <b>AgRh-NC</b> | -0.73 | -0.45       |
| <b>CdRh-NC</b> | -0.54 | -0.62       |
| <b>TcAg-NC</b> | -1.51 | -3.24       |
| <b>TcRu-NC</b> | -1.40 | -4.66       |
| <b>AgRu-NC</b> | -1.02 | -2.33       |
| <b>CdRu-NC</b> | -0.83 | -2.30       |
| <b>TcCd-NC</b> | -1.19 | -3.11       |
| <b>CdAg-NC</b> | -1.44 | -0.62       |

**Table S12** The difference of adsorption energies of the metal atom between  $M_1M_2$ -NC and  $M_1M_2$ -SAC ( $\Delta E_{ad(SAC)}$ ) in eV for 4d-5d  $M_1M_2$ -NC. The BACs possess instability against forming single-atom sites are marked in red.

|                | <b>configurations 2</b> | <b>configurations 4</b> |
|----------------|-------------------------|-------------------------|
| <b>PdPt-NC</b> | <b>0.03</b>             | <b>0.49</b>             |
| <b>RhIr-NC</b> | -0.32                   | -1.90                   |
| <b>TcPt-NC</b> | -0.52                   | -2.24                   |
| <b>TcIr-NC</b> | -0.86                   | -3.68                   |
| <b>OsRh-NC</b> | -0.65                   | -3.30                   |
| <b>RhPt-NC</b> | -0.20                   | -0.24                   |
| <b>RuIr-NC</b> | -0.56                   | -3.06                   |
| <b>RuPt-NC</b> | -0.29                   | -1.55                   |
| <b>TcOs-NC</b> | -1.45                   | -4.88                   |
| <b>OsPd-NC</b> | -0.57                   | -2.02                   |
| <b>PdIr-NC</b> | -0.28                   | -0.25                   |
| <b>OsRu-NC</b> | -0.98                   | -4.26                   |
| <b>ReRh-NC</b> | -1.10                   | -4.27                   |
| <b>RePd-NC</b> | -0.66                   | -2.80                   |
| <b>ReRu-NC</b> | -1.55                   | -5.07                   |

|                |       |       |
|----------------|-------|-------|
| <b>ReTc-NC</b> | -2.32 | -6.17 |
| <b>ReAg-NC</b> | -1.73 | -3.99 |
| <b>OsAg-NC</b> | -1.25 | -2.87 |
| <b>AgIr-NC</b> | -0.75 | -1.26 |
| <b>AgPt-NC</b> | -0.69 | -0.20 |
| <b>ReCd-NC</b> | -1.44 | -3.70 |
| <b>CdOs-NC</b> | -0.86 | -2.71 |
| <b>CdIr-NC</b> | -0.47 | -0.78 |
| <b>CdPt-NC</b> | -0.75 | -0.08 |

**Table S13** The difference of adsorption energies of the metal atom between  $M_1M_2$ -NC and  $M_1M_2$ -SAC ( $\Delta E_{\text{ad(SAC)}}$ ) in eV for 5d-5d dimer-atom sites. The BACs possess instability against forming single-atom sites are marked in red.

|                | <b>configurations 2</b> | <b>configurations 4</b> |
|----------------|-------------------------|-------------------------|
| <b>2Re-NC</b>  | -1.41                   | -6.00                   |
| <b>2Os-NC</b>  | -1.17                   | -4.65                   |
| <b>2Ir-NC</b>  | -0.26                   | -1.88                   |
| <b>2Pt-NC</b>  | <b>0.06</b>             | <b>0.67</b>             |
| <b>PtIr-NC</b> | -0.22                   | -0.11                   |
| <b>OsPt-NC</b> | -0.30                   | -1.68                   |
| <b>OsIr-NC</b> | -0.48                   | -3.28                   |
| <b>RePt-NC</b> | -0.51                   | -2.66                   |
| <b>ReIr-NC</b> | -1.11                   | -4.29                   |
| <b>ReOs-NC</b> | -1.65                   | -5.33                   |

**Table S14** The data of  $\theta_M$ ,  $E_M$  and  $\phi_{BAC}$  for 3d-3d  $M_1M_2$ -NC.

|                | $\theta_M$ |       | $E_M$ |       | $\phi_{BAC}$ |
|----------------|------------|-------|-------|-------|--------------|
|                | $M_1$      | $M_2$ | $M_1$ | $M_2$ |              |
| <b>2Co-NC</b>  | 9          | 9     | 1.88  | 1.88  | 24.68        |
| <b>2Ni-NC</b>  | 10         | 10    | 1.91  | 1.91  | 27.64        |
| <b>NiCo-NC</b> | 10         | 9     | 1.91  | 1.88  | 26.16        |
| <b>CuCo-NC</b> | 11         | 9     | 1.90  | 1.88  | 27.50        |
| <b>FeCo-NC</b> | 8          | 9     | 1.83  | 1.88  | 23.16        |
| <b>2Cu-NC</b>  | 11         | 11    | 1.90  | 1.90  | 30.32        |
| <b>CuNi-NC</b> | 11         | 10    | 1.90  | 1.91  | 28.98        |
| <b>NiFe-NC</b> | 10         | 8     | 1.91  | 1.83  | 24.64        |
| <b>FeCu-NC</b> | 8          | 11    | 1.83  | 1.90  | 25.98        |
| <b>2Fe-NC</b>  | 8          | 8     | 1.83  | 1.83  | 21.64        |
| <b>2Zn-NC</b>  | 12         | 12    | 1.65  | 1.65  | 30.83        |
| <b>ZnCo-NC</b> | 12         | 9     | 1.65  | 1.88  | 27.75        |
| <b>MnCo-NC</b> | 7          | 9     | 1.55  | 1.88  | 21.06        |
| <b>ZnMn-NC</b> | 12         | 7     | 1.65  | 1.55  | 24.13        |
| <b>CuZn-NC</b> | 11         | 12    | 1.90  | 1.65  | 30.58        |
| <b>ZnFe-NC</b> | 12         | 8     | 1.65  | 1.83  | 26.24        |
| <b>CuMn-NC</b> | 11         | 7     | 1.90  | 1.55  | 23.88        |
| <b>NiZn-NC</b> | 10         | 12    | 1.91  | 1.65  | 29.23        |
| <b>NiMn-NC</b> | 10         | 7     | 1.91  | 1.55  | 22.54        |
| <b>MnFe-NC</b> | 7          | 8     | 1.55  | 1.83  | 19.54        |
| <b>2Mn-NC</b>  | 7          | 7     | 1.55  | 1.55  | 17.43        |

**Table S15** The data of  $\theta_M$ ,  $E_M$  and  $\phi_{BAC}$  for 3d-4d  $M_1M_2$ -NC.

|                | $\theta_M$ |       | $E_M$ |       | $\phi_{BAC}$ |
|----------------|------------|-------|-------|-------|--------------|
|                | $M_1$      | $M_2$ | $M_1$ | $M_2$ |              |
| <b>PdNi-NC</b> | 10         | 10    | 2.20  | 1.91  | 19.44        |
| <b>PdFe-NC</b> | 10         | 8     | 2.20  | 1.83  | 18.44        |
| <b>PdCo-NC</b> | 10         | 9     | 2.20  | 1.88  | 18.95        |
| <b>RhCo-NC</b> | 9          | 9     | 2.28  | 1.88  | 17.70        |
| <b>PdCu-NC</b> | 10         | 11    | 2.20  | 1.90  | 19.89        |
| <b>AgFe-NC</b> | 11         | 8     | 1.93  | 1.83  | 18.89        |
| <b>RhFe-NC</b> | 9          | 8     | 2.28  | 1.83  | 17.20        |
| <b>RuCo-NC</b> | 8          | 9     | 2.20  | 1.88  | 15.98        |
| <b>TcCo-NC</b> | 7          | 9     | 1.90  | 1.88  | 13.76        |
| <b>RhNi-NC</b> | 9          | 10    | 2.28  | 1.91  | 18.20        |
| <b>AgNi-NC</b> | 11         | 10    | 1.93  | 1.91  | 19.89        |
| <b>RuFe-NC</b> | 8          | 8     | 2.20  | 1.83  | 15.47        |
| <b>RuNi-NC</b> | 8          | 10    | 2.20  | 1.91  | 16.47        |
| <b>TcNi-NC</b> | 7          | 10    | 1.90  | 1.91  | 14.26        |
| <b>TcFe-NC</b> | 7          | 8     | 1.90  | 1.83  | 13.26        |
| <b>AgCu-NC</b> | 11         | 11    | 1.93  | 1.90  | 20.34        |
| <b>RhCu-NC</b> | 9          | 11    | 2.28  | 1.90  | 18.64        |
| <b>PdMn-NC</b> | 10         | 7     | 2.20  | 1.55  | 17.74        |
| <b>AgCo-NC</b> | 11         | 9     | 1.93  | 1.88  | 19.40        |
| <b>TcCu-NC</b> | 7          | 11    | 1.90  | 1.90  | 14.70        |
| <b>RuCu-NC</b> | 8          | 11    | 2.20  | 1.90  | 16.92        |
| <b>RhMn-NC</b> | 9          | 7     | 2.28  | 1.55  | 16.49        |
| <b>AgMn-NC</b> | 11         | 7     | 1.93  | 1.55  | 18.19        |
| <b>AgZn-NC</b> | 11         | 12    | 1.93  | 1.65  | 20.42        |
| <b>PdZn-NC</b> | 10         | 12    | 2.20  | 1.65  | 19.97        |

|                |    |    |      |      |       |
|----------------|----|----|------|------|-------|
| <b>RuMn-NC</b> | 8  | 7  | 2.20 | 1.55 | 14.77 |
| <b>TcMn-NC</b> | 7  | 7  | 1.90 | 1.55 | 12.55 |
| <b>CdFe-NC</b> | 12 | 8  | 1.69 | 1.83 | 19.21 |
| <b>RhZn-NC</b> | 9  | 12 | 2.28 | 1.65 | 18.73 |
| <b>TcZn-NC</b> | 7  | 12 | 1.90 | 1.65 | 14.79 |
| <b>CdZn-NC</b> | 12 | 12 | 1.69 | 1.65 | 20.74 |
| <b>RuZn-NC</b> | 8  | 12 | 2.20 | 1.65 | 17.00 |
| <b>CdNi-NC</b> | 12 | 10 | 1.69 | 1.91 | 20.21 |
| <b>CdCu-NC</b> | 12 | 11 | 1.69 | 1.90 | 20.65 |
| <b>CdMn-NC</b> | 12 | 7  | 1.69 | 1.55 | 18.50 |
| <b>CdCo-NC</b> | 12 | 9  | 1.69 | 1.88 | 19.71 |

**Table S16** The data of  $\theta_M$ ,  $E_M$  and  $\phi_{BAC}$  for 3d-5d  $M_1M_2$ -NC.

|                | $\theta_M$ |       | $E_M$ |       | $\phi_{BAC}$ |
|----------------|------------|-------|-------|-------|--------------|
|                | $M_1$      | $M_2$ | $M_1$ | $M_2$ |              |
| <b>PtCo-NC</b> | 10         | 9     | 2.28  | 1.88  | 19.21        |
| <b>PtNi-NC</b> | 10         | 10    | 2.28  | 1.91  | 19.71        |
| <b>PtFe-NC</b> | 10         | 8     | 2.28  | 1.83  | 18.71        |
| <b>ReCo-NC</b> | 7          | 9     | 1.90  | 1.88  | 13.76        |
| <b>IrCo-NC</b> | 9          | 9     | 2.20  | 1.88  | 17.46        |
| <b>PtCu-NC</b> | 10         | 11    | 2.28  | 1.90  | 20.15        |
| <b>IrFe-NC</b> | 9          | 8     | 2.20  | 1.83  | 16.96        |
| <b>OsCo-NC</b> | 8          | 9     | 2.20  | 1.88  | 15.98        |
| <b>ReFe-NC</b> | 7          | 8     | 1.90  | 1.83  | 13.26        |
| <b>ReNi-NC</b> | 7          | 10    | 1.90  | 1.91  | 14.26        |
| <b>OsFe-NC</b> | 8          | 8     | 2.20  | 1.83  | 15.47        |
| <b>IrNi-NC</b> | 9          | 10    | 2.20  | 1.91  | 17.96        |
| <b>OsNi-NC</b> | 8          | 10    | 2.20  | 1.91  | 16.47        |



|                |    |    |      |      |       |
|----------------|----|----|------|------|-------|
| <b>ReCu-NC</b> | 7  | 11 | 1.90 | 1.90 | 14.70 |
| <b>PtMn-NC</b> | 10 | 7  | 2.28 | 1.55 | 18.00 |
| <b>IrCu-NC</b> | 9  | 11 | 2.20 | 1.90 | 18.40 |
| <b>OsCu-NC</b> | 8  | 11 | 2.20 | 1.90 | 16.92 |
| <b>IrMn-NC</b> | 9  | 7  | 2.20 | 1.55 | 16.25 |
| <b>ReMn-NC</b> | 7  | 7  | 1.90 | 1.55 | 12.55 |
| <b>OsMn-NC</b> | 8  | 7  | 2.20 | 1.55 | 14.77 |
| <b>ReZn-NC</b> | 7  | 12 | 1.90 | 1.65 | 14.79 |
| <b>OsZn-NC</b> | 8  | 12 | 2.20 | 1.65 | 17.00 |
| <b>IrZn-NC</b> | 9  | 12 | 2.20 | 1.65 | 18.49 |
| <b>PtZn-NC</b> | 10 | 12 | 2.28 | 1.65 | 20.24 |

**Table S17** The data of  $\theta_M$ ,  $E_M$  and  $\phi_{BAC}$  for 4d-4d  $M_1M_2$ -NC.

|                | $\theta_M$ |       | $E_M$ |       | $\Phi_{BAC}$ |
|----------------|------------|-------|-------|-------|--------------|
|                | $M_1$      | $M_2$ | $M_1$ | $M_2$ |              |
| <b>TcRh-NC</b> | 7          | 9     | 1.9   | 2.28  | 23.24        |
| <b>RhRu-NC</b> | 9          | 8     | 2.28  | 2.20  | 25.46        |
| <b>RhPd-NC</b> | 10         | 9     | 2.28  | 2.20  | 28.45        |
| <b>PdRu-NC</b> | 10         | 8     | 2.20  | 2.20  | 26.70        |
| <b>TcPd-NC</b> | 7          | 10    | 1.90  | 2.20  | 24.48        |
| <b>TcRu-NC</b> | 7          | 8     | 1.90  | 2.20  | 21.51        |
| <b>AgRh-NC</b> | 11         | 9     | 1.93  | 2.28  | 28.87        |
| <b>TcAg-NC</b> | 7          | 11    | 1.90  | 1.93  | 24.93        |
| <b>AgRu-NC</b> | 11         | 8     | 1.93  | 2.20  | 27.15        |
| <b>AgPd-NC</b> | 11         | 10    | 1.93  | 2.20  | 30.11        |
| <b>TcCd-NC</b> | 7          | 12    | 1.90  | 1.63  | 24.97        |
| <b>CdAg-NC</b> | 12         | 11    | 1.63  | 1.93  | 30.60        |
| <b>CdRu-NC</b> | 12         | 8     | 1.63  | 2.20  | 27.19        |

|                |    |    |      |      |       |
|----------------|----|----|------|------|-------|
| <b>CdPd-NC</b> | 12 | 10 | 1.63 | 2.20 | 30.15 |
| <b>CdRh-NC</b> | 12 | 9  | 1.63 | 2.28 | 28.91 |
| <b>2Tc-NC</b>  | 7  | 7  | 1.90 | 1.90 | 19.30 |
| <b>2Ru-NC</b>  | 8  | 8  | 2.20 | 2.20 | 23.73 |
| <b>2Rh-NC</b>  | 9  | 9  | 2.28 | 2.28 | 27.18 |
| <b>2Pd-NC</b>  | 10 | 10 | 2.20 | 2.20 | 29.66 |
| <b>2Ag-NC</b>  | 11 | 11 | 1.93 | 1.93 | 30.56 |
| <b>2Cd-NC</b>  | 12 | 12 | 1.63 | 1.63 | 30.64 |

**Table S18** The data of  $\theta_M$ ,  $E_M$  and  $\varphi_{BAC}$  for 4d-5d  $M_1M_2$ -NC.

|                | $\theta_M$ |       | $E_M$ |       | $\varphi_{BAC}$ |
|----------------|------------|-------|-------|-------|-----------------|
|                | $M_1$      | $M_2$ | $M_1$ | $M_2$ |                 |
| <b>PdPt-NC</b> | 10         | 10    | 2.20  | 2.28  | 29.93           |
| <b>RhIr-NC</b> | 9          | 9     | 2.28  | 2.20  | 26.94           |
| <b>TcPt-NC</b> | 7          | 10    | 1.90  | 2.28  | 24.75           |
| <b>TcIr-NC</b> | 7          | 9     | 1.90  | 2.20  | 23.00           |
| <b>OsRh-NC</b> | 8          | 9     | 2.20  | 2.28  | 25.46           |
| <b>RhPt-NC</b> | 9          | 10    | 2.28  | 2.28  | 28.69           |
| <b>RuIr-NC</b> | 8          | 9     | 2.20  | 2.20  | 25.22           |
| <b>RuPt-NC</b> | 8          | 10    | 2.28  | 2.20  | 26.91           |
| <b>TcOs-NC</b> | 7          | 8     | 1.90  | 2.20  | 21.51           |
| <b>OsPd-NC</b> | 8          | 10    | 2.20  | 2.20  | 26.70           |
| <b>PdIr-NC</b> | 10         | 9     | 2.20  | 2.20  | 28.18           |
| <b>OsRu-NC</b> | 8          | 8     | 2.20  | 2.20  | 23.73           |
| <b>ReRh-NC</b> | 7          | 9     | 1.90  | 2.28  | 23.24           |
| <b>RePd-NC</b> | 7          | 10    | 1.90  | 2.20  | 24.48           |
| <b>ReRu-NC</b> | 7          | 8     | 1.90  | 2.20  | 21.51           |
| <b>ReTc-NC</b> | 7          | 7     | 1.90  | 1.90  | 19.30           |

|                |    |    |      |      |       |
|----------------|----|----|------|------|-------|
| <b>ReAg-NC</b> | 7  | 11 | 1.90 | 1.93 | 24.93 |
| <b>OsAg-NC</b> | 8  | 11 | 1.93 | 2.20 | 27.43 |
| <b>AgIr-NC</b> | 11 | 9  | 1.93 | 2.20 | 28.63 |
| <b>AgPt-NC</b> | 11 | 10 | 1.93 | 2.28 | 30.38 |
| <b>ReCd-NC</b> | 7  | 12 | 1.90 | 1.63 | 24.97 |
| <b>CdOs-NC</b> | 12 | 8  | 1.63 | 2.20 | 27.19 |
| <b>CdIr-NC</b> | 12 | 9  | 1.63 | 2.20 | 28.67 |
| <b>CdPt-NC</b> | 12 | 10 | 1.63 | 2.28 | 30.42 |

**Table S19** The data of  $\theta_M$ ,  $E_M$  and  $\phi_{BAC}$  for 5d-5d  $M_1M_2$ -NC.

|                | $\theta_M$ |       | $E_M$ |       | $\phi_{BAC}$ |
|----------------|------------|-------|-------|-------|--------------|
|                | $M_1$      | $M_2$ | $M_1$ | $M_2$ |              |
| <b>PtIr-NC</b> | 10         | 9     | 2.28  | 2.20  | 28.45        |
| <b>OsIr-NC</b> | 8          | 9     | 2.20  | 2.20  | 25.22        |
| <b>OsPt-NC</b> | 8          | 10    | 2.20  | 2.28  | 26.97        |
| <b>ReIr-NC</b> | 7          | 9     | 1.90  | 2.20  | 23.00        |
| <b>RePt-NC</b> | 7          | 10    | 1.90  | 2.28  | 24.75        |
| <b>ReOs-NC</b> | 7          | 8     | 1.90  | 2.20  | 21.51        |
| <b>2Re-NC</b>  | 7          | 7     | 1.90  | 1.90  | 19.30        |
| <b>2Os-NC</b>  | 8          | 8     | 2.20  | 2.20  | 23.73        |
| <b>2Ir-NC</b>  | 9          | 9     | 2.20  | 2.20  | 26.70        |
| <b>2Pt-NC</b>  | 10         | 10    | 2.28  | 2.28  | 30.20        |

**Table S20** The difference of adsorption energies of the metal atom between heteronuclear BACs and homonuclear BACs ( $\Delta E_{ad}$ ) of configurations 2 in eV.

| $\Delta E_{ad}$ |       | $\Delta E_{ad}$ |       | $\Delta E_{ad}$ |       | $\Delta E_{ad}$ |       |
|-----------------|-------|-----------------|-------|-----------------|-------|-----------------|-------|
| 3d-3d           |       | RhCu-NC         | 0.02  | IrMn-NC         | -0.02 | ReAg-NC         | -0.39 |
| MnFe-NC         | -0.15 | RhZn-NC         | 0.06  | IrFe-NC         | -0.17 | ReCd-NC         | -0.18 |
| MnCo-NC         | -0.16 | PdMn-NC         | -0.22 | IrCo-NC         | -0.09 | TcOs-NC         | -0.50 |
| NiMn-NC         | -0.16 | PdFe-NC         | -0.07 | IrNi-NC         | -0.11 | OsRu-NC         | 0.02  |
| CuMn-NC         | -0.29 | PdCo-NC         | -0.07 | IrCu-NC         | -0.07 | OsRh-NC         | 0.11  |
| ZnMn-NC         | -0.30 | PdNi-NC         | -0.05 | IrZn-NC         | 0.02  | OsPd-NC         | 0.12  |
| FeCo-NC         | -0.02 | PdCu-NC         | -0.03 | PtMn-NC         | -0.23 | OsAg-NC         | -0.20 |
| NiFe-NC         | 0.01  | PdZn-NC         | 0.01  | PtFe-NC         | 0.14  | CdOs-NC         | 0.27  |
| FeCu-NC         | -0.03 | AgMn-NC         | -0.23 | PtCo-NC         | -0.10 | TcIr-NC         | -0.23 |
| ZnFe-NC         | -0.03 | AgFe-NC         | -0.09 | PtNi-NC         | -0.12 | RuIr-NC         | 0.14  |
| NiCo-NC         | 0.02  | AgCo-NC         | 0.00  | PtCu-NC         | -0.07 | RhIr-NC         | -0.06 |
| CuCo-NC         | -0.01 | AgNi-NC         | 0.06  | PtZn-NC         | -0.04 | PdIr-NC         | -0.11 |
| ZnCo-NC         | 0.01  | AgCu-NC         | -0.01 | 4d-4d           |       | AgIr-NC         | -0.04 |
| CuNi-NC         | 0.05  | AgZn-NC         | -0.03 | TcRu-NC         | -0.48 | CdIr-NC         | 0.26  |
| CuZn-NC         | -0.01 | CdMn-NC         | -0.19 | TcRh-NC         | -0.33 | TcPt-NC         | -0.15 |
| NiZn-NC         | 0.13  | CdFe-NC         | 0.12  | TcPd-NC         | -0.16 | RuPt-NC         | 0.14  |
| 3d-4d           |       | CdCo-NC         | 0.25  | TcAg-NC         | -0.50 | RhPt-NC         | -0.05 |
| TcMn-NC         | -0.12 | CdNi-NC         | 0.31  | TcCd-NC         | -0.21 | PdPt-NC         | 0.02  |
| TcFe-NC         | -0.05 | CdCu-NC         | 0.54  | RhRu-NC         | 0.03  | AgPt-NC         | -0.05 |
| TcCo-NC         | -0.16 | CdZn-NC         | 0.02  | PdRu-NC         | 0.12  | CdPt-NC         | 0.24  |
| TcNi-NC         | -0.15 | 3d-5d           |       | AgRu-NC         | -0.04 | 5d-5d           |       |
| TcCu-NC         | -0.43 | ReMn-NC         | 0.12  | CdRu-NC         | 0.26  | ReOs-NC         | -0.32 |
| TcZn-NC         | -0.32 | ReFe-NC         | 0.07  | RhPd-NC         | -0.12 | ReIr-NC         | -0.16 |
| RuMn-NC         | 0.20  | ReCo-NC         | 0.06  | AgRh-NC         | -0.03 | RePt-NC         | 0.18  |
| RuFe-NC         | 0.28  | ReNi-NC         | 0.07  | CdRh-NC         | 0.22  | OsIr-NC         | 0.25  |

|         |       |         |       |         |       |         |       |
|---------|-------|---------|-------|---------|-------|---------|-------|
| RuCo-NC | 0.33  | ReCu-NC | -0.22 | AgPd-NC | -0.04 | OsPt-NC | 0.15  |
| RuNi-NC | 0.24  | ReZn-NC | -0.12 | CdPd-NC | 0.32  | PtIr-NC | -0.10 |
| RuCu-NC | 0.15  | OsMn-NC | 0.48  | CdAg-NC | -0.17 |         |       |
| RuZn-NC | 0.25  | OsFe-NC | 0.24  | 4d-5d   |       |         |       |
| RhMn-NC | -0.08 | OsCo-NC | 0.13  | ReTc-NC | -0.59 |         |       |
| RhFe-NC | 0.01  | OsNi-NC | 0.06  | ReRu-NC | -0.33 |         |       |
| RhCo-NC | 0.04  | OsCu-NC | 0.03  | ReRh-NC | -0.12 |         |       |
| RhNi-NC | -0.08 | OsZn-NC | 0.26  | RePd-NC | 0.08  |         |       |

**Table S21** The difference of adsorption energies of the metal atom between heteronuclear BACs and homonuclear BACs ( $\Delta E_{ad}$ ) of configurations 4 in eV.

| $\Delta E_{ad}$ |       | $\Delta E_{ad}$ |       | $\Delta E_{ad}$ |       | $\Delta E_{ad}$ |       |
|-----------------|-------|-----------------|-------|-----------------|-------|-----------------|-------|
| 3d-3d           |       | RhCu-NC         | 0.66  | IrMn-NC         | -0.39 | ReAg-NC         | -0.33 |
| MnFe-NC         | -0.15 | RhZn-NC         | 0.55  | IrFe-NC         | -0.10 | ReCd-NC         | -0.42 |
| MnCo-NC         | -0.38 | PdMn-NC         | -0.53 | IrCo-NC         | 0.07  | TcOs-NC         | -0.05 |
| NiMn-NC         | -0.30 | PdFe-NC         | -0.28 | IrNi-NC         | 0.66  | OsRu-NC         | -0.02 |
| CuMn-NC         | -0.25 | PdCo-NC         | 0.02  | IrCu-NC         | 0.71  | OsRh-NC         | 0.01  |
| ZnMn-NC         | -0.36 | PdNi-NC         | 0.03  | IrZn-NC         | 0.51  | OsPd-NC         | 0.22  |
| FeCo-NC         | -0.08 | PdCu-NC         | 0.00  | PtMn-NC         | -0.61 | OsAg-NC         | -0.05 |
| NiFe-NC         | -0.04 | PdZn-NC         | -0.21 | PtFe-NC         | -0.34 | CdOs-NC         | -0.11 |
| FeCu-NC         | 0.10  | AgMn-NC         | -0.17 | PtCo-NC         | -0.10 | TcIr-NC         | -0.11 |
| ZnFe-NC         | -0.11 | AgFe-NC         | 0.16  | PtNi-NC         | -0.07 | RuIr-NC         | -0.05 |
| NiCo-NC         | 0.09  | AgCo-NC         | 0.22  | PtCu-NC         | -0.07 | RhIr-NC         | -0.02 |
| CuCo-NC         | 0.19  | AgNi-NC         | 0.21  | PtZn-NC         | -0.30 | PdIr-NC         | 0.53  |
| ZnCo-NC         | 0.11  | AgCu-NC         | 0.06  | 4d-4d           |       | AgIr-NC         | 0.28  |
| CuNi-NC         | 0.17  | AgZn-NC         | -0.18 | TcRu-NC         | -0.09 | CdIr-NC         | 0.48  |
| CuZn-NC         | -0.17 | CdMn-NC         | 0.08  | TcRh-NC         | -0.07 | TcPt-NC         | -0.03 |
| NiZn-NC         | 0.03  | CdFe-NC         | 0.46  | TcPd-NC         | 0.02  | RuPt-NC         | 0.07  |

|         |       |         |       |         |       |         |       |
|---------|-------|---------|-------|---------|-------|---------|-------|
| 3d-4d   |       | CdCo-NC | 0.75  | TcAg-NC | -0.07 | RhPt-NC | 0.40  |
| TcMn-NC | -0.17 | CdNi-NC | 0.77  | TcCd-NC | -0.27 | PdPt-NC | -0.02 |
| TcFe-NC | 0.14  | CdCu-NC | 0.50  | RhRu-NC | 0.00  | AgPt-NC | 0.16  |
| TcCo-NC | 0.04  | CdZn-NC | 0.39  | PdRu-NC | 0.12  | CdPt-NC | 0.33  |
| TcNi-NC | 0.38  | 3d-5d   |       | AgRu-NC | 0.17  | 5d-5d   |       |
| TcCu-NC | 0.38  | ReMn-NC | -0.27 | CdRu-NC | 0.02  | ReOs-NC | 0.03  |
| TcZn-NC | 0.11  | ReFe-NC | 0.04  | RhPd-NC | 0.43  | ReIr-NC | -0.23 |
| RuMn-NC | -0.13 | ReCo-NC | -0.08 | AgRh-NC | 1.08  | RePt-NC | 0.02  |
| RuFe-NC | 0.04  | ReNi-NC | 0.37  | CdRh-NC | 0.66  | OsIr-NC | 0.00  |
| RuCo-NC | 0.08  | ReCu-NC | 0.35  | AgPd-NC | 0.12  | OsPt-NC | 0.22  |
| RuNi-NC | 0.49  | ReZn-NC | -0.01 | CdPd-NC | 0.45  | PtIr-NC | 0.51  |
| RuCu-NC | 0.53  | OsMn-NC | -0.21 | CdAg-NC | 0.39  |         |       |
| RuZn-NC | 0.33  | OsFe-NC | 0.01  | 4d-5d   |       |         |       |
| RhMn-NC | -0.33 | OsCo-NC | 0.04  | ReTc-NC | 0.00  |         |       |
| RhFe-NC | 0.12  | OsNi-NC | 0.53  | ReRu-NC | -0.06 |         |       |
| RhCo-NC | 0.14  | OsCu-NC | 0.55  | ReRh-NC | -0.19 |         |       |
| RhNi-NC | 0.63  | OsZn-NC | 0.24  | RePd-NC | 0.04  |         |       |

**Table S22** The difference of the chemical potentials between metal SA and metal NP ( $\Delta E_{SA}^f(R)$ ) in eV for 3d-3d  $M_1M_2$ -NC.

|                | $M_1M_2$ -NC-2        |                       | $M_1M_2$ -NC-4        |                       |
|----------------|-----------------------|-----------------------|-----------------------|-----------------------|
|                | $\Delta E_{M_1}^f(R)$ | $\Delta E_{M_2}^f(R)$ | $\Delta E_{M_1}^f(R)$ | $\Delta E_{M_2}^f(R)$ |
| <b>MnFe-NC</b> | -3.43                 | -2.72                 | -4.04                 | -2.72                 |
| <b>MnCo-NC</b> | -3.69                 | -2.82                 | -3.59                 | -2.90                 |
| <b>MnNi-NC</b> | -3.43                 | -2.90                 | -3.80                 | -2.83                 |
| <b>CuMn-NC</b> | -1.52                 | -3.66                 | -1.14                 | -3.43                 |
| <b>MnZn-NC</b> | -3.55                 | -2.78                 | -3.77                 | -1.87                 |
| <b>FeCo-NC</b> | -3.28                 | -3.18                 | -3.17                 | -3.79                 |

|                |       |       |       |       |
|----------------|-------|-------|-------|-------|
| <b>NiFe-NC</b> | -3.03 | -2.99 | -3.77 | -3.42 |
| <b>FeCu-NC</b> | -3.13 | -1.77 | -2.95 | -1.99 |
| <b>ZnFe-NC</b> | -2.81 | -3.01 | -2.82 | -3.40 |
| <b>CoNi-NC</b> | -3.06 | -3.26 | -3.25 | -2.97 |
| <b>CuCo-NC</b> | -1.92 | -3.02 | -1.23 | -2.82 |
| <b>ZnCo-NC</b> | -3.02 | -3.05 | -1.93 | -3.13 |
| <b>CuNi-NC</b> | -1.61 | -3.08 | -1.53 | -2.84 |
| <b>CuZn-NC</b> | -1.65 | -2.89 | -1.79 | -2.17 |
| <b>NiZn-NC</b> | -3.66 | -2.65 | -3.23 | -2.30 |
| <b>2Mn-NC</b>  | -2.85 | -2.98 | -2.68 | -2.68 |
| <b>2Fe-NC</b>  | -3.08 | -3.01 | -3.76 | -3.76 |
| <b>2Co-NC</b>  | -3.34 | -3.09 | -3.04 | -3.04 |
| <b>2Ni-NC</b>  | -3.03 | -3.28 | -3.35 | -3.35 |
| <b>2Cu-NC</b>  | -1.59 | -1.76 | -1.38 | -1.38 |
| <b>2Zn-NC</b>  | -2.76 | -3.53 | -2.24 | -2.24 |

**Table S23** The difference of the chemical potentials between metal SA and metal NP ( $\Delta E_{SA}^f(R)$ ) in eV for 3d-4d  $M_1M_2$ -NC. The BACs possess instability against atom aggregation are marked in red.

|                | <b><math>M_1M_2</math>-NC-2</b> |                       | <b><math>M_1M_2</math>-NC-4</b> |                       |
|----------------|---------------------------------|-----------------------|---------------------------------|-----------------------|
|                | $\Delta E_{M_1}^f(R)$           | $\Delta E_{M_2}^f(R)$ | $\Delta E_{M_1}^f(R)$           | $\Delta E_{M_2}^f(R)$ |
| <b>TcMn-NC</b> | -0.10                           | -2.46                 | -1.83                           | -2.38                 |
| <b>TcFe-NC</b> | -0.53                           | -2.12                 | -2.72                           | -1.95                 |
| <b>TcCo-NC</b> | -0.56                           | -2.30                 | -2.14                           | -2.00                 |
| <b>TcNi-NC</b> | -0.55                           | -2.24                 | -2.10                           | -1.68                 |
| <b>TcZn-NC</b> | -0.70                           | -2.16                 | -2.27                           | -0.93                 |
| <b>TcCu-NC</b> | -0.77                           | -1.16                 | -1.77                           | -0.04                 |
| <b>RuMn-NC</b> | -0.20                           | -3.11                 | -1.65                           | -2.47                 |
| <b>RuFe-NC</b> | -0.63                           | -2.77                 | -2.60                           | -2.18                 |

---

|                |       |       |             |       |
|----------------|-------|-------|-------------|-------|
| <b>RuCo-NC</b> | -0.51 | -2.80 | -1.88       | -2.09 |
| <b>RuNi-NC</b> | -0.59 | -2.83 | -1.77       | -1.70 |
| <b>RuZn-NC</b> | -0.55 | -2.56 | -1.84       | -0.84 |
| <b>RuCu-NC</b> | -0.61 | -1.55 | -1.40       | -0.02 |
| <b>RhMn-NC</b> | -1.32 | -3.75 | -1.91       | -3.02 |
| <b>RhFe-NC</b> | -1.73 | -3.38 | -2.66       | -2.45 |
| <b>RhCo-NC</b> | -1.62 | -3.43 | -1.96       | -2.38 |
| <b>RhNi-NC</b> | -1.74 | -3.06 | -1.77       | -1.91 |
| <b>RhZn-NC</b> | -1.58 | -3.10 | -1.75       | -0.97 |
| <b>RhCu-NC</b> | -1.56 | -2.02 | -1.41       | -0.23 |
| <b>PdMn-NC</b> | -1.86 | -3.43 | -1.38       | -3.27 |
| <b>PdFe-NC</b> | -2.01 | -3.01 | -2.33       | -2.90 |
| <b>PdCo-NC</b> | -2.25 | -3.09 | -1.36       | -2.55 |
| <b>PdNi-NC</b> | -2.23 | -3.02 | -1.64       | -2.55 |
| <b>PdZn-NC</b> | -2.68 | -2.71 | -1.78       | -1.77 |
| <b>PdCu-NC</b> | -2.06 | -1.62 | -1.35       | -0.95 |
| <b>AgMn-NC</b> | -0.06 | -3.42 | <b>0.57</b> | -2.98 |
| <b>AgFe-NC</b> | -0.22 | -3.00 | -0.29       | -2.53 |
| <b>AgCo-NC</b> | -0.37 | -3.00 | <b>0.43</b> | -2.43 |
| <b>AgNi-NC</b> | -0.31 | -2.89 | <b>0.13</b> | -2.46 |
| <b>AgZn-NC</b> | -0.91 | -2.72 | -0.17       | -1.82 |
| <b>AgCu-NC</b> | -0.24 | -1.59 | <b>0.31</b> | -0.96 |
| <b>CdMn-NC</b> | -0.93 | -3.52 | <b>0.21</b> | -2.92 |
| <b>CdFe-NC</b> | -0.92 | -2.94 | -0.61       | -2.49 |
| <b>CdCo-NC</b> | -1.04 | -2.90 | <b>0.35</b> | -2.09 |
| <b>CdNi-NC</b> | -0.97 | -2.78 | <b>0.08</b> | -2.09 |
| <b>CdZn-NC</b> | -1.76 | -2.81 | -0.21       | -1.44 |
| <b>CdCu-NC</b> | -0.59 | -1.18 | <b>0.14</b> | -0.72 |

---



**Table S24** The difference of the chemical potentials between metal SA and metal NP ( $\Delta E_{SA}^f(R)$ ) in eV for 3d-5d  $M_1M_2$ -NC. The BACs possess instability against atom aggregation are marked in red.

|                | $M_1M_2$ -NC-2        |                       | $M_1M_2$ -NC-4        |                       |
|----------------|-----------------------|-----------------------|-----------------------|-----------------------|
|                | $\Delta E_{M_1}^f(R)$ | $\Delta E_{M_2}^f(R)$ | $\Delta E_{M_1}^f(R)$ | $\Delta E_{M_2}^f(R)$ |
| <b>ReMn-NC</b> | 0.77                  | -2.03                 | -1.33                 | -2.41                 |
| <b>ReFe-NC</b> | 0.42                  | -1.81                 | -2.24                 | -2.00                 |
| <b>ReCo-NC</b> | 0.17                  | -1.90                 | -1.66                 | -2.05                 |
| <b>ReNi-NC</b> | 0.18                  | -1.84                 | -1.50                 | -1.62                 |
| <b>ReZn-NC</b> | -0.52                 | -1.77                 | -1.79                 | -0.98                 |
| <b>ReCu-NC</b> | 0.04                  | -0.76                 | -1.20                 | 0.00                  |
| <b>OsMn-NC</b> | 0.85                  | -2.33                 | -1.13                 | -2.16                 |
| <b>OsFe-NC</b> | 0.10                  | -2.30                 | -2.11                 | -1.81                 |
| <b>OsCo-NC</b> | 0.06                  | -2.49                 | -1.41                 | -1.74                 |
| <b>OsNi-NC</b> | 0.00                  | -2.51                 | -1.21                 | -1.26                 |
| <b>OsZn-NC</b> | 0.21                  | -2.06                 | -1.41                 | -0.53                 |
| <b>OsCu-NC</b> | 0.04                  | -1.17                 | -0.86                 | 0.40                  |
| <b>IrMn-NC</b> | -0.93                 | -3.17                 | -1.52                 | -2.60                 |
| <b>IrFe-NC</b> | -1.38                 | -3.05                 | -2.42                 | -2.18                 |
| <b>IrCo-NC</b> | -1.54                 | -3.05                 | -1.59                 | -1.97                 |
| <b>IrNi-NC</b> | -1.56                 | -3.02                 | -1.28                 | -1.39                 |
| <b>IrZn-NC</b> | -1.94                 | -2.64                 | -1.39                 | -0.52                 |
| <b>IrCu-NC</b> | -1.37                 | -1.61                 | -0.91                 | 0.30                  |
| <b>PtMn-NC</b> | -2.01                 | -3.54                 | -1.57                 | -2.92                 |
| <b>PtFe-NC</b> | -1.94                 | -2.90                 | -2.42                 | -2.53                 |
| <b>PtCo-NC</b> | -2.42                 | -3.22                 | -1.51                 | -2.24                 |

|         |       |       |       |       |
|---------|-------|-------|-------|-------|
| PtNi-NC | -2.44 | -3.19 | -1.76 | -2.22 |
| PtZn-NC | -2.86 | -2.86 | -1.90 | -1.44 |
| PtCu-NC | -2.24 | -1.77 | -1.44 | -0.59 |

**Table S25** The difference of the chemical potentials between metal SA and metal NP ( $\Delta E_{SA}^f(R)$ ) in eV for 4d-4d  $M_1M_2$ -NC. The BACs possess instability against atom aggregation are marked in red.

|         | $M_1M_2$ -NC-2        |                       | $M_1M_2$ -NC-4        |                       |
|---------|-----------------------|-----------------------|-----------------------|-----------------------|
|         | $\Delta E_{M_1}^f(R)$ | $\Delta E_{M_2}^f(R)$ | $\Delta E_{M_1}^f(R)$ | $\Delta E_{M_2}^f(R)$ |
| TcRu-NC | -0.54                 | -0.37                 | -1.41                 | -1.06                 |
| TcRh-NC | -0.68                 | -1.05                 | -1.73                 | -1.17                 |
| TcPd-NC | -0.50                 | -1.16                 | -1.69                 | -0.35                 |
| TcCd-NC | -0.31                 | -0.30                 | -2.25                 | 0.33                  |
| TcAg-NC | -0.62                 | 0.31                  | -1.85                 | 1.15                  |
| RhRu-NC | -1.66                 | -0.74                 | -1.24                 | -1.45                 |
| PdRu-NC | -0.87                 | -0.65                 | -0.39                 | -1.38                 |
| CdRu-NC | -0.76                 | -0.26                 | 0.49                  | -1.74                 |
| AgRu-NC | -0.15                 | -0.58                 | 1.25                  | -1.40                 |
| RhPd-NC | -1.71                 | -2.44                 | -1.20                 | -0.42                 |
| RhAg-NC | -1.40                 | -0.54                 | -0.63                 | 1.81                  |
| RhCd-NC | -1.14                 | -1.20                 | -1.24                 | 0.78                  |
| AgPd-NC | -0.52                 | -1.68                 | 0.81                  | -0.86                 |
| CdPd-NC | -1.07                 | -1.30                 | 0.52                  | -0.73                 |
| CdAg-NC | -0.91                 | 0.02                  | 0.39                  | 0.81                  |
| 2Tc-NC  | 0.53                  | 0.73                  | -1.18                 | -1.18                 |
| 2Ru-NC  | -0.87                 | -0.49                 | -1.10                 | -1.10                 |
| 2Rh-NC  | -2.05                 | -1.61                 | -1.58                 | -1.58                 |
| 2Pd-NC  | -2.29                 | -1.87                 | -0.91                 | -0.91                 |
| 2Ag-NC  | -0.03                 | 0.17                  | 0.61                  | 0.61                  |

|               |       |       |       |       |
|---------------|-------|-------|-------|-------|
| <b>2Cd-NC</b> | -1.09 | -0.73 | -0.20 | -0.20 |
|---------------|-------|-------|-------|-------|

**Table S26** The difference of the chemical potentials between metal SA and metal NP ( $\Delta E_{SA}^f(R)$ ) in eV for 4d-5d  $M_1M_2$ -NC. The BACs possess instability against atom aggregation are marked in red.

|                | $M_1M_2$ -NC-2        |                       | $M_1M_2$ -NC-4        |                       |
|----------------|-----------------------|-----------------------|-----------------------|-----------------------|
|                | $\Delta E_{M_1}^f(R)$ | $\Delta E_{M_2}^f(R)$ | $\Delta E_{M_1}^f(R)$ | $\Delta E_{M_2}^f(R)$ |
| <b>TcIr-NC</b> | -0.51                 | -0.50                 | -1.29                 | -0.76                 |
| <b>RhIr-NC</b> | -2.09                 | -1.21                 | -1.12                 | -1.15                 |
| <b>RuIr-NC</b> | -1.06                 | -0.73                 | -1.02                 | -0.86                 |
| <b>PdIr-NC</b> | -2.42                 | -1.25                 | 0.16                  | -0.65                 |
| <b>CdIr-NC</b> | -1.15                 | -1.00                 | 1.09                  | -0.97                 |
| <b>AgIr-NC</b> | -0.54                 | -0.96                 | 1.49                  | -0.98                 |
| <b>RhPt-NC</b> | -2.26                 | -2.07                 | -0.80                 | -0.48                 |
| <b>TcPt-NC</b> | -0.59                 | -1.28                 | -1.31                 | -0.43                 |
| <b>RuPt-NC</b> | -1.23                 | -1.59                 | -1.00                 | -0.49                 |
| <b>PdPt-NC</b> | -2.46                 | -1.99                 | -0.50                 | -0.96                 |
| <b>AgPt-NC</b> | -0.72                 | -1.83                 | 1.27                  | -0.85                 |
| <b>CdPt-NC</b> | -1.34                 | -1.89                 | 0.83                  | -0.87                 |
| <b>TcOs-NC</b> | -0.44                 | 0.37                  | -0.97                 | -0.50                 |
| <b>RhOs-NC</b> | -1.44                 | 0.10                  | -0.83                 | -0.92                 |
| <b>RuOs-NC</b> | -0.70                 | 0.29                  | -0.72                 | -0.62                 |
| <b>PdOs-NC</b> | -1.70                 | 0.12                  | 0.11                  | -0.75                 |
| <b>CdOs-NC</b> | -0.65                 | 0.15                  | 0.76                  | -1.35                 |
| <b>AgOs-NC</b> | -0.21                 | 0.03                  | 1.43                  | -1.10                 |
| <b>RhRe-NC</b> | -0.66                 | -0.15                 | -1.23                 | -1.25                 |

|                |             |             |             |       |
|----------------|-------------|-------------|-------------|-------|
| <b>TcRe-NC</b> | <b>0.13</b> | <b>0.70</b> | -1.12       | -0.58 |
| <b>RuRe-NC</b> | -0.04       | -0.02       | -0.96       | -0.78 |
| <b>PdRe-NC</b> | -0.73       | <b>0.08</b> | -0.27       | -1.07 |
| <b>CdRe-NC</b> | -0.09       | <b>0.11</b> | <b>0.25</b> | -1.80 |
| <b>AgRe-NC</b> | <b>0.61</b> | <b>0.05</b> | <b>0.95</b> | -1.52 |

**Table S27** The difference of the chemical potentials between metal SA and metal NP ( $\Delta E_{SA}^f(R)$ ) in eV for 5d-5d  $M_1M_2$ -NC. The BACs possess instability against atom aggregation are marked in red.

|                | $M_1M_2$ -NC-2        |                       | $M_1M_2$ -NC-4        |                       |
|----------------|-----------------------|-----------------------|-----------------------|-----------------------|
|                | $\Delta E_{M_1}^f(R)$ | $\Delta E_{M_2}^f(R)$ | $\Delta E_{M_1}^f(R)$ | $\Delta E_{M_2}^f(R)$ |
| <b>ReIr-NC</b> | -0.18                 | -0.25                 | -0.81                 | -0.82                 |
| <b>ReOs-NC</b> | <b>0.14</b>           | <b>0.74</b>           | -0.28                 | -0.35                 |
| <b>RePt-NC</b> | -0.01                 | -0.76                 | -0.66                 | -0.32                 |
| <b>OsIr-NC</b> | <b>0.10</b>           | -0.49                 | -0.44                 | -0.39                 |
| <b>OsPt-NC</b> | -0.46                 | -1.46                 | -0.33                 | <b>0.08</b>           |
| <b>PtIr-NC</b> | -2.54                 | -1.34                 | <b>0.12</b>           | -0.23                 |
| <b>2Re-NC</b>  | <b>1.24</b>           | <b>1.48</b>           | -0.51                 | -0.51                 |
| <b>2Os-NC</b>  | <b>0.05</b>           | <b>0.40</b>           | -0.18                 | -0.18                 |
| <b>2Ir-NC</b>  | -1.58                 | -1.08                 | -0.65                 | -0.65                 |
| <b>2Pt-NC</b>  | -2.62                 | -2.11                 | -0.51                 | -0.51                 |

**Table S28** The BACs prepared in experiments<sup>13-27</sup>.

| <b>Catalytic reaction</b> |                    | <b>References</b>                          |
|---------------------------|--------------------|--------------------------------------------|
| <b>2Fe-NC</b>             | ORR                | Chem. 2019, 5, 1-14                        |
| <b>2Co-NC</b>             | ORR                | Nano Energy. 2018, 46, 396-403             |
| <b>2Cu-NC</b>             | CO <sub>2</sub> RR | ACS Energy Lett. 2020, 5, 1044-1053        |
| <b>2Ni-NC</b>             | CO <sub>2</sub> RR | J. Am. Chem. Soc. 2021, 143, 11317-11324   |
| <b>FeCu-NC</b>            | ORR                | J. Mater. Chem. A, 2020, 8, 16994-17001    |
| <b>FeNi-NC</b>            | ORR                | J. Phys. Chem. Lett., 2020, 11, 1404-1410  |
|                           | CO <sub>2</sub> RR | Angew. Chem. Int. Ed., 2019, 58, 6972-6976 |
| <b>FeCo-NC</b>            | ORR                | J. Am. Chem. Soc., 2017, 139, 17281-17284  |
|                           | ORR                | Energy Environ. Sci., 2018, 11, 3375-3379  |
| <b>FeMn-NC</b>            | ORR                | Appl Catal. B, 2021, 288, 120021           |
| <b>NiCo-NC</b>            | ORR                | Adv. Mater., 2019, 1905622                 |
| <b>ZnCo-NC</b>            | ORR                | Angew. Chem. Int. Ed., 2019, 58, 2622-2626 |
| <b>PdCu-NC</b>            | NRR                | Angew. Chem. Int. Ed., 2021, 60, 345-350   |
| <b>PtCo-NC</b>            | ORR                | J. Am. Chem. Soc., 2018, 140, 10757-10763  |
| <b>PtRu-NC</b>            | HER                | Nat. Commun., 2019, 10, 4936               |

**Table S29** The data of Z<sub>0</sub>, A, B, C, D and F for 5d metal atom aggregation of 5d-3d and 5d-4d/5d BACs.

| <b>M<sub>2</sub></b> |       | <b>Z<sub>0</sub></b> | <b>a</b> | <b>b</b> | <b>c</b> | <b>d</b> | <b>f</b> |
|----------------------|-------|----------------------|----------|----------|----------|----------|----------|
| <b>7~9 group</b>     | 5d-3d | -889.41              | -4.30    | 121.90   | 0.0435   | -3.87    | 0.0516   |

|                    |          |         |        |       |        |         |         |
|--------------------|----------|---------|--------|-------|--------|---------|---------|
| <b>metal atom</b>  | 5d-4d/5d | 194.51  | -9.62  | 0.028 | 0.115  | -0.0019 | 0.0044  |
| <b>10~12 group</b> | 5d-3d    | 154.07  | -18.94 | 2.39  | 0.535  | -0.083  | -0.022  |
| <b>metal atom</b>  | 5d-4d/5d | -112.57 | 11.87  | 0.062 | -0.316 | 0.001   | -0.0037 |

**Table S30** The dissolution potential of  $M_1$  and  $M_2$  atoms in eV for 3d-3d  $M_1M_2$ -NC in pH = 0.

|                | $M_1M_2$ -NC-2       |                      | $M_1M_2$ -NC-4       |                      |
|----------------|----------------------|----------------------|----------------------|----------------------|
|                | $U_{\text{dis}(M1)}$ | $U_{\text{dis}(M2)}$ | $U_{\text{dis}(M1)}$ | $U_{\text{dis}(M2)}$ |
| <b>MnFe-NC</b> | 0.53                 | 0.91                 | 0.83                 | 0.91                 |
| <b>MnCo-NC</b> | 0.66                 | 1.13                 | 0.61                 | 1.17                 |
| <b>NiMn-NC</b> | 1.19                 | 0.53                 | 1.16                 | 0.72                 |
| <b>CuMn-NC</b> | 1.10                 | 0.65                 | 0.91                 | 0.53                 |
| <b>ZnMn-NC</b> | 0.63                 | 0.59                 | 0.18                 | 0.70                 |
| <b>FeCo-NC</b> | 1.19                 | 1.21                 | 1.14                 | 1.62                 |
| <b>NiFe-NC</b> | 1.26                 | 1.05                 | 1.63                 | 1.26                 |
| <b>FeCu-NC</b> | 1.12                 | 1.11                 | 1.03                 | 1.34                 |
| <b>ZnFe-NC</b> | 0.64                 | 1.06                 | 0.65                 | 1.25                 |
| <b>NiCo-NC</b> | 1.37                 | 1.25                 | 1.23                 | 1.34                 |
| <b>CuCo-NC</b> | 1.30                 | 1.23                 | 0.96                 | 1.13                 |
| <b>ZnCo-NC</b> | 0.75                 | 1.25                 | 0.20                 | 1.29                 |
| <b>CuNi-NC</b> | 1.15                 | 1.28                 | 1.11                 | 1.17                 |
| <b>CuZn-NC</b> | 1.17                 | 0.68                 | 1.24                 | 0.33                 |
| <b>NiZn-NC</b> | 1.57                 | 0.56                 | 1.36                 | 0.39                 |
| <b>2Mn-NC</b>  | 0.24                 | 0.36                 | 0.16                 | 0.16                 |
| <b>2Fe-NC</b>  | 1.09                 | 1.06                 | 1.43                 | 1.43                 |
| <b>2Co-NC</b>  | 1.26                 | 1.39                 | 1.24                 | 1.24                 |
| <b>2Ni-NC</b>  | 1.26                 | 1.38                 | 1.42                 | 1.42                 |
| <b>2Cu-NC</b>  | 1.14                 | 1.22                 | 1.03                 | 1.03                 |

|               |      |      |      |      |
|---------------|------|------|------|------|
| <b>2Zn-NC</b> | 0.62 | 1.00 | 0.35 | 0.35 |
|---------------|------|------|------|------|

**Table S31** The dissolution potential of  $M_1$  and  $M_2$  atoms in eV for 3d-4d  $M_1M_2$ -NC in pH = 0.

|                | <b><math>M_1M_2</math>-NC-2</b> |                      | <b><math>M_1M_2</math>-NC-4</b> |                      |
|----------------|---------------------------------|----------------------|---------------------------------|----------------------|
|                | $U_{\text{dis}(M1)}$            | $U_{\text{dis}(M2)}$ | $U_{\text{dis}(M1)}$            | $U_{\text{dis}(M2)}$ |
| <b>TcMn-NC</b> | 0.45                            | 0.05                 | 1.32                            | 0.01                 |
| <b>TcFe-NC</b> | 0.67                            | 0.61                 | 1.76                            | 0.53                 |
| <b>TcCo-NC</b> | 0.68                            | 0.87                 | 1.47                            | 0.72                 |
| <b>TcNi-NC</b> | 0.67                            | 0.86                 | 1.45                            | 0.58                 |
| <b>TcZn-NC</b> | 0.75                            | 0.32                 | 1.54                            | -0.30                |
| <b>TcCu-NC</b> | 0.78                            | 0.92                 | 1.28                            | 0.36                 |
| <b>RuMn-NC</b> | 0.55                            | 0.37                 | 1.28                            | 0.05                 |
| <b>RuFe-NC</b> | 0.77                            | 0.94                 | 1.76                            | 0.64                 |
| <b>RuCo-NC</b> | 0.71                            | 1.12                 | 1.40                            | 0.77                 |
| <b>RuNi-NC</b> | 0.75                            | 1.16                 | 1.34                            | 0.59                 |
| <b>RuZn-NC</b> | 0.73                            | 0.52                 | 1.37                            | -0.34                |
| <b>RuCu-NC</b> | 0.76                            | 1.12                 | 1.15                            | 0.35                 |
| <b>RhMn-NC</b> | 1.26                            | 0.69                 | 1.56                            | 0.33                 |
| <b>RhFe-NC</b> | 1.46                            | 1.24                 | 1.93                            | 0.78                 |
| <b>RhCo-NC</b> | 1.41                            | 1.43                 | 1.58                            | 0.91                 |
| <b>RhNi-NC</b> | 1.47                            | 1.27                 | 1.49                            | 0.70                 |
| <b>RhZn-NC</b> | 1.39                            | 0.79                 | 1.48                            | -0.28                |
| <b>RhCu-NC</b> | 1.38                            | 1.35                 | 1.30                            | 0.46                 |
| <b>PdMn-NC</b> | 1.85                            | 0.53                 | 1.61                            | 0.45                 |
| <b>PdFe-NC</b> | 1.92                            | 1.06                 | 2.08                            | 1.00                 |

|                |       |      |       |       |
|----------------|-------|------|-------|-------|
| <b>PdCo-NC</b> | 2.04  | 1.26 | 1.59  | 1.00  |
| <b>PdNi-NC</b> | 2.03  | 1.25 | 1.73  | 1.02  |
| <b>PdZn-NC</b> | 2.25  | 0.59 | 1.81  | 0.12  |
| <b>PdCu-NC</b> | 1.94  | 1.15 | 1.59  | 0.82  |
| <b>AgMn-NC</b> | 0.86  | 0.52 | 0.23  | 0.31  |
| <b>AgFe-NC</b> | 1.02  | 1.05 | 1.09  | 0.82  |
| <b>AgCo-NC</b> | 1.17  | 1.22 | 0.37  | 0.93  |
| <b>AgNi-NC</b> | 1.11  | 1.19 | 0.67  | 0.97  |
| <b>AgZn-NC</b> | 1.71  | 0.60 | 0.97  | 0.15  |
| <b>AgCu-NC</b> | 1.04  | 1.14 | 0.49  | 0.82  |
| <b>CdMn-NC</b> | 0.06  | 0.57 | -0.51 | 0.28  |
| <b>CdFe-NC</b> | 0.06  | 1.02 | -0.07 | 0.80  |
| <b>CdCo-NC</b> | 0.12  | 1.17 | -0.58 | 0.76  |
| <b>CdNi-NC</b> | 0.08  | 1.13 | -0.44 | 0.79  |
| <b>CdZn-NC</b> | 0.48  | 0.65 | -0.30 | -0.04 |
| <b>CdCu-NC</b> | -0.11 | 0.93 | -0.47 | 0.70  |

**Table S32** The dissolution potential of  $M_1$  and  $M_2$  atoms in eV for 3d-5d  $M_1M_2$ -NC in pH = 0.

|                | <b><math>M_1M_2</math>-NC-2</b> |                       | <b><math>M_1M_2</math>-NC-4</b> |                       |
|----------------|---------------------------------|-----------------------|---------------------------------|-----------------------|
|                | $U_{\text{dis}(M_1)}$           | $U_{\text{dis}(M_2)}$ | $U_{\text{dis}(M_1)}$           | $U_{\text{dis}(M_2)}$ |
| <b>ReMn-NC</b> | 0.04                            | -0.17                 | 0.74                            | 0.02                  |
| <b>ReFe-NC</b> | 0.16                            | 0.46                  | 1.05                            | 0.55                  |
| <b>ReCo-NC</b> | 0.24                            | 0.67                  | 0.85                            | 0.74                  |
| <b>ReNi-NC</b> | 0.24                            | 0.66                  | 0.80                            | 0.55                  |
| <b>ReZn-NC</b> | 0.47                            | 0.12                  | 0.90                            | -0.27                 |
| <b>ReCu-NC</b> | 0.29                            | 0.72                  | 0.70                            | 0.34                  |
| <b>OsMn-NC</b> | 0.49                            | -0.02                 | 1.42                            | -0.11                 |
| <b>OsFe-NC</b> | 0.80                            | 0.70                  | 1.90                            | 0.46                  |



|                |      |      |      |       |
|----------------|------|------|------|-------|
| <b>OsCo-NC</b> | 0.82 | 0.96 | 1.55 | 0.59  |
| <b>OsNi-NC</b> | 0.85 | 1.00 | 1.46 | 0.37  |
| <b>OsZn-NC</b> | 0.74 | 0.27 | 1.55 | -0.50 |
| <b>OsCu-NC</b> | 0.83 | 0.93 | 1.28 | 0.14  |
| <b>IrMn-NC</b> | 1.47 | 0.40 | 1.66 | 0.12  |
| <b>IrFe-NC</b> | 1.62 | 1.08 | 1.96 | 0.64  |
| <b>IrCo-NC</b> | 1.67 | 1.24 | 1.69 | 0.71  |
| <b>IrNi-NC</b> | 1.68 | 1.25 | 1.58 | 0.44  |
| <b>IrZn-NC</b> | 1.80 | 0.56 | 1.60 | -0.50 |
| <b>IrCu-NC</b> | 1.61 | 1.14 | 1.46 | 0.19  |
| <b>PtMn-NC</b> | 2.18 | 0.59 | 1.97 | 0.27  |
| <b>PtFe-NC</b> | 2.15 | 1.00 | 2.39 | 0.82  |
| <b>PtCo-NC</b> | 2.39 | 1.33 | 1.93 | 0.84  |
| <b>PtNi-NC</b> | 2.40 | 1.34 | 2.06 | 0.86  |
| <b>PtZn-NC</b> | 2.61 | 0.67 | 2.13 | -0.04 |
| <b>PtCu-NC</b> | 2.30 | 1.22 | 1.90 | 0.64  |

**Table S33** The dissolution potential of  $M_1$  and  $M_2$  atoms in eV for 4d-4d  $M_1M_2$ -NC in pH = 0.

|                | <b><math>M_1M_2</math>-NC-2</b> |                       | <b><math>M_1M_2</math>-NC-4</b> |                       |
|----------------|---------------------------------|-----------------------|---------------------------------|-----------------------|
|                | $U_{\text{dis}(M_1)}$           | $U_{\text{dis}(M_2)}$ | $U_{\text{dis}(M_1)}$           | $U_{\text{dis}(M_2)}$ |
| <b>TcRu-NC</b> | 0.67                            | 0.64                  | 1.10                            | 0.98                  |
| <b>TcRh-NC</b> | 0.74                            | 1.13                  | 1.27                            | 1.19                  |
| <b>TcPd-NC</b> | 0.65                            | 1.49                  | 1.24                            | 1.09                  |
| <b>TcCd-NC</b> | 0.55                            | -0.25                 | 1.53                            | -0.57                 |
| <b>TcAg-NC</b> | 0.71                            | 0.49                  | 1.33                            | -0.35                 |
| <b>RhRu-NC</b> | 1.43                            | 0.83                  | 1.22                            | 1.18                  |
| <b>PdRu-NC</b> | 1.61                            | 0.78                  | 1.11                            | 1.14                  |
| <b>CdRu-NC</b> | -0.02                           | 0.59                  | -0.65                           | 1.33                  |

|                |      |       |       |       |
|----------------|------|-------|-------|-------|
| <b>AgRu-NC</b> | 0.95 | 0.74  | -0.45 | 1.15  |
| <b>RhPd-NC</b> | 1.46 | 2.13  | 1.20  | 1.13  |
| <b>RhAg-NC</b> | 1.30 | 1.34  | 0.92  | -1.01 |
| <b>RhCd-NC</b> | 1.17 | 0.20  | 1.22  | -0.79 |
| <b>AgPd-NC</b> | 1.32 | 1.75  | -0.01 | 1.34  |
| <b>CdPd-NC</b> | 0.13 | 1.57  | -0.66 | 1.28  |
| <b>CdAg-NC</b> | 0.05 | 0.78  | -0.60 | -0.01 |
| <b>2Tc-NC</b>  | 0.13 | 0.04  | 0.99  | 0.99  |
| <b>2Ru-NC</b>  | 0.89 | 0.70  | 1.01  | 1.01  |
| <b>2Rh-NC</b>  | 1.62 | 1.40  | 1.39  | 1.39  |
| <b>2Pd-NC</b>  | 2.06 | 1.85  | 1.37  | 1.37  |
| <b>2Ag-NC</b>  | 0.83 | 0.63  | 0.19  | 0.19  |
| <b>2Cd-NC</b>  | 0.14 | -0.04 | -0.31 | -0.31 |

**Table S34** The dissolution potential of  $M_1$  and  $M_2$  atoms in eV for 4d-5d  $M_1M_2$ -NC in pH = 0.

|                | <b><math>M_1M_2</math>-NC-2</b> |                       | <b><math>M_1M_2</math>-NC-4</b> |                       |
|----------------|---------------------------------|-----------------------|---------------------------------|-----------------------|
|                | $U_{\text{dis}(M_1)}$           | $U_{\text{dis}(M_2)}$ | $U_{\text{dis}(M_1)}$           | $U_{\text{dis}(M_2)}$ |
| <b>TcIr-NC</b> | 0.66                            | 1.32                  | 1.04                            | 1.41                  |
| <b>RhIr-NC</b> | 1.64                            | 1.56                  | 1.16                            | 1.54                  |
| <b>RuIr-NC</b> | 0.99                            | 1.40                  | 0.96                            | 1.44                  |
| <b>PdIr-NC</b> | 2.12                            | 1.57                  | 0.83                            | 1.37                  |
| <b>CdIr-NC</b> | 0.17                            | 1.49                  | -0.95                           | 1.48                  |
| <b>AgIr-NC</b> | 1.34                            | 1.48                  | -0.69                           | 1.48                  |
| <b>RhPt-NC</b> | 1.73                            | 2.21                  | 1.00                            | 1.42                  |
| <b>TcPt-NC</b> | 0.70                            | 1.82                  | 1.06                            | 1.40                  |
| <b>RuPt-NC</b> | 1.07                            | 1.98                  | 0.95                            | 1.42                  |
| <b>PdPt-NC</b> | 2.15                            | 2.17                  | 1.17                            | 1.66                  |
| <b>AgPt-NC</b> | 1.52                            | 2.10                  | -0.47                           | 1.61                  |
| <b>CdPt-NC</b> | 0.27                            | 2.12                  | -0.82                           | 1.62                  |

|                |       |      |       |      |
|----------------|-------|------|-------|------|
| <b>TcOs-NC</b> | 0.62  | 0.66 | 0.88  | 1.10 |
| <b>RhOs-NC</b> | 1.32  | 0.80 | 1.01  | 1.31 |
| <b>RuOs-NC</b> | 0.80  | 0.70 | 0.81  | 1.16 |
| <b>PdOs-NC</b> | 1.77  | 0.79 | 0.86  | 1.23 |
| <b>CdOs-NC</b> | -0.08 | 0.78 | -0.78 | 1.53 |
| <b>AgOs-NC</b> | 1.01  | 0.83 | -0.63 | 1.40 |
| <b>RhRe-NC</b> | 0.93  | 0.35 | 1.21  | 0.72 |
| <b>TcRe-NC</b> | 0.34  | 0.07 | 0.96  | 0.49 |
| <b>RuRe-NC</b> | 0.31  | 0.48 | 0.96  | 0.56 |
| <b>PdRe-NC</b> | 1.28  | 0.27 | 1.05  | 0.66 |
| <b>CdRe-NC</b> | -0.36 | 0.26 | -0.53 | 0.90 |
| <b>AgRe-NC</b> | 0.19  | 0.28 | -0.15 | 0.81 |

**Table S35** The dissolution potential of  $M_1$  and  $M_2$  atoms in eV for 5d-5d  $M_1M_2$ -NC in pH = 0.

|                | $M_1M_2$ -NC-2        |                       | $M_1M_2$ -NC-4        |                       |
|----------------|-----------------------|-----------------------|-----------------------|-----------------------|
|                | $U_{\text{dis}(M_1)}$ | $U_{\text{dis}(M_2)}$ | $U_{\text{dis}(M_1)}$ | $U_{\text{dis}(M_2)}$ |
| <b>ReIr-NC</b> | 0.36                  | 1.24                  | 0.57                  | 1.43                  |
| <b>ReOs-NC</b> | 0.25                  | 0.48                  | 0.39                  | 1.02                  |
| <b>RePt-NC</b> | 0.30                  | 1.56                  | 0.52                  | 1.34                  |
| <b>OsIr-NC</b> | 0.80                  | 1.32                  | 1.07                  | 1.29                  |
| <b>OsPt-NC</b> | 1.08                  | 1.91                  | 1.02                  | 1.14                  |
| <b>PtIr-NC</b> | 2.45                  | 1.60                  | 1.12                  | 1.23                  |
| <b>2Re-NC</b>  | -0.11                 | -0.19                 | 0.47                  | 0.47                  |
| <b>2Os-NC</b>  | 0.83                  | 0.65                  | 0.94                  | 0.94                  |
| <b>2Ir-NC</b>  | 1.68                  | 1.52                  | 1.37                  | 1.37                  |
| <b>2Pt-NC</b>  | 2.49                  | 2.23                  | 1.43                  | 1.43                  |

**Table S36** The dissolution potential (vs RHE) of  $M_1$  and  $M_2$  atoms in eV for 3d-3d  $M_1M_2$ -NC in pH = 14.

|                | $M_1M_2$ -NC-2        |                       | $M_1M_2$ -NC-4        |                       |
|----------------|-----------------------|-----------------------|-----------------------|-----------------------|
|                | $U_{\text{dis}(M_1)}$ | $U_{\text{dis}(M_2)}$ | $U_{\text{dis}(M_1)}$ | $U_{\text{dis}(M_2)}$ |
| <b>MnFe-NC</b> | 0.98                  | 1.31                  | 1.29                  | 1.31                  |
| <b>MnCo-NC</b> | 1.11                  | 1.51                  | 1.06                  | 1.55                  |
| <b>NiMn-NC</b> | 1.56                  | 0.98                  | 1.52                  | 1.17                  |
| <b>CuMn-NC</b> | 1.37                  | 1.10                  | 1.18                  | 0.98                  |
| <b>ZnMn-NC</b> | 0.97                  | 1.04                  | 0.52                  | 1.15                  |
| <b>FeCo-NC</b> | 1.59                  | 1.69                  | 1.54                  | 2.00                  |
| <b>NiFe-NC</b> | 1.62                  | 1.45                  | 1.99                  | 1.66                  |
| <b>FeCu-NC</b> | 1.52                  | 1.49                  | 1.43                  | 1.60                  |
| <b>ZnFe-NC</b> | 0.98                  | 1.45                  | 0.99                  | 1.65                  |
| <b>NiCo-NC</b> | 1.74                  | 1.63                  | 1.59                  | 1.72                  |
| <b>CuCo-NC</b> | 1.57                  | 1.61                  | 1.22                  | 1.51                  |
| <b>ZnCo-NC</b> | 1.09                  | 1.62                  | 0.54                  | 1.66                  |
| <b>CuNi-NC</b> | 1.41                  | 1.65                  | 1.37                  | 1.53                  |
| <b>CuZn-NC</b> | 1.43                  | 1.02                  | 1.50                  | 0.67                  |
| <b>NiZn-NC</b> | 1.94                  | 0.90                  | 1.72                  | 0.73                  |
| <b>2Mn-NC</b>  | 0.69                  | 0.76                  | 0.61                  | 0.61                  |
| <b>2Fe-NC</b>  | 1.46                  | 1.49                  | 1.83                  | 1.83                  |
| <b>2Co-NC</b>  | 1.64                  | 1.77                  | 1.62                  | 1.62                  |
| <b>2Ni-NC</b>  | 1.62                  | 1.75                  | 1.78                  | 1.78                  |

|               |      |      |      |      |
|---------------|------|------|------|------|
| <b>2Cu-NC</b> | 1.40 | 1.49 | 1.30 | 1.30 |
| <b>2Zn-NC</b> | 0.96 | 1.34 | 0.70 | 0.70 |

**Table S37** The dissolution potential of  $M_1$  and  $M_2$  atoms in eV for 3d-4d  $M_1M_2$ -NC in pH = 14.

|                | <b><math>M_1M_2</math>-NC-2</b> |                      | <b><math>M_1M_2</math>-NC-4</b> |                      |
|----------------|---------------------------------|----------------------|---------------------------------|----------------------|
|                | $U_{\text{dis}(M1)}$            | $U_{\text{dis}(M2)}$ | $U_{\text{dis}(M1)}$            | $U_{\text{dis}(M2)}$ |
| <b>TcMn-NC</b> | 0.30                            | 0.50                 | 0.73                            | 0.46                 |
| <b>TcFe-NC</b> | 0.41                            | 1.01                 | 0.95                            | 0.92                 |
| <b>TcCo-NC</b> | 0.41                            | 1.25                 | 0.81                            | 1.10                 |
| <b>TcNi-NC</b> | 0.41                            | 1.23                 | 0.80                            | 0.94                 |
| <b>TcZn-NC</b> | 0.45                            | 0.66                 | 0.84                            | 0.04                 |
| <b>TcCu-NC</b> | 0.46                            | 1.19                 | 0.71                            | 0.62                 |
| <b>RuMn-NC</b> | 0.80                            | 0.82                 | 1.29                            | 0.50                 |
| <b>RuFe-NC</b> | 0.95                            | 1.33                 | 1.61                            | 1.04                 |
| <b>RuCo-NC</b> | 0.91                            | 1.50                 | 1.37                            | 1.14                 |
| <b>RuNi-NC</b> | 0.93                            | 1.52                 | 1.33                            | 0.96                 |
| <b>RuZn-NC</b> | 0.92                            | 0.86                 | 1.35                            | 0.00                 |
| <b>RuCu-NC</b> | 0.94                            | 1.38                 | 1.20                            | 0.61                 |
| <b>RhMn-NC</b> | 1.50                            | 1.14                 | 1.79                            | 0.78                 |
| <b>RhFe-NC</b> | 1.70                            | 1.64                 | 2.17                            | 1.17                 |
| <b>RhCo-NC</b> | 1.65                            | 1.81                 | 1.82                            | 1.29                 |
| <b>RhNi-NC</b> | 1.71                            | 1.64                 | 1.72                            | 1.06                 |
| <b>RhZn-NC</b> | 1.63                            | 1.13                 | 1.72                            | 0.06                 |
| <b>RhCu-NC</b> | 1.62                            | 1.62                 | 1.54                            | 0.72                 |
| <b>PdMn-NC</b> | 1.83                            | 0.98                 | 1.59                            | 0.90                 |

|                |      |      |       |      |
|----------------|------|------|-------|------|
| <b>PdFe-NC</b> | 1.90 | 1.46 | 2.06  | 1.40 |
| <b>PdCo-NC</b> | 2.02 | 1.64 | 1.58  | 1.37 |
| <b>PdNi-NC</b> | 2.01 | 1.62 | 1.72  | 1.38 |
| <b>PdZn-NC</b> | 2.24 | 0.93 | 1.79  | 0.46 |
| <b>PdCu-NC</b> | 1.93 | 1.42 | 1.57  | 1.08 |
| <b>AgMn-NC</b> | 1.23 | 0.98 | 0.60  | 0.76 |
| <b>AgFe-NC</b> | 1.39 | 1.45 | 1.46  | 1.21 |
| <b>AgCo-NC</b> | 1.54 | 1.60 | 0.74  | 1.31 |
| <b>AgNi-NC</b> | 1.48 | 1.55 | 1.04  | 1.33 |
| <b>AgZn-NC</b> | 2.08 | 0.94 | 1.34  | 0.49 |
| <b>AgCu-NC</b> | 1.40 | 1.40 | 0.86  | 1.09 |
| <b>CdMn-NC</b> | 0.47 | 1.03 | -0.10 | 0.73 |
| <b>CdFe-NC</b> | 0.47 | 1.42 | 0.34  | 1.19 |
| <b>CdCo-NC</b> | 0.52 | 1.55 | -0.17 | 1.14 |
| <b>CdNi-NC</b> | 0.49 | 1.49 | -0.03 | 1.15 |
| <b>CdZn-NC</b> | 0.89 | 0.99 | 0.11  | 0.30 |
| <b>CdCu-NC</b> | 0.30 | 1.20 | -0.06 | 0.96 |

**Table S38** The dissolution potential of  $M_1$  and  $M_2$  atoms in eV for 3d-5d  $M_1M_2$ -NC in pH = 14.

|                | <b><math>M_1M_2</math>-NC-2</b> |                       | <b><math>M_1M_2</math>-NC-4</b> |                       |
|----------------|---------------------------------|-----------------------|---------------------------------|-----------------------|
|                | $U_{\text{dis}(M_1)}$           | $U_{\text{dis}(M_2)}$ | $U_{\text{dis}(M_1)}$           | $U_{\text{dis}(M_2)}$ |
| <b>ReMn-NC</b> | 0.13                            | 0.28                  | 0.43                            | 0.47                  |
| <b>ReFe-NC</b> | 0.18                            | 0.86                  | 0.56                            | 0.95                  |
| <b>ReCo-NC</b> | 0.22                            | 1.05                  | 0.48                            | 1.12                  |
| <b>ReNi-NC</b> | 0.22                            | 1.02                  | 0.46                            | 0.92                  |
| <b>ReZn-NC</b> | 0.32                            | 0.47                  | 0.50                            | 0.07                  |
| <b>ReCu-NC</b> | 0.24                            | 0.98                  | 0.41                            | 0.61                  |
| <b>OsMn-NC</b> | 0.46                            | 0.43                  | 0.96                            | 0.34                  |

|                |      |      |      |       |
|----------------|------|------|------|-------|
| <b>OsFe-NC</b> | 0.65 | 1.10 | 1.20 | 0.85  |
| <b>OsCo-NC</b> | 0.66 | 1.34 | 1.03 | 0.96  |
| <b>OsNi-NC</b> | 0.68 | 1.36 | 0.98 | 0.74  |
| <b>OsZn-NC</b> | 0.62 | 0.61 | 1.03 | -0.16 |
| <b>OsCu-NC</b> | 0.67 | 1.19 | 0.89 | 0.40  |
| <b>IrMn-NC</b> | 1.16 | 0.85 | 1.31 | 0.57  |
| <b>IrFe-NC</b> | 1.27 | 1.47 | 1.53 | 1.04  |
| <b>IrCo-NC</b> | 1.31 | 1.62 | 1.32 | 1.08  |
| <b>IrNi-NC</b> | 1.32 | 1.62 | 1.25 | 0.80  |
| <b>IrZn-NC</b> | 1.41 | 0.90 | 1.26 | -0.16 |
| <b>IrCu-NC</b> | 1.27 | 1.41 | 1.15 | 0.46  |
| <b>PtMn-NC</b> | 1.97 | 1.04 | 1.75 | 0.73  |
| <b>PtFe-NC</b> | 1.94 | 1.40 | 2.18 | 1.22  |
| <b>PtCo-NC</b> | 2.18 | 1.71 | 1.71 | 1.22  |
| <b>PtNi-NC</b> | 2.19 | 1.70 | 1.85 | 1.22  |
| <b>PtZn-NC</b> | 2.40 | 1.01 | 1.92 | 0.30  |
| <b>PtCu-NC</b> | 2.08 | 1.49 | 1.69 | 0.90  |

**Table S39** The dissolution potential of  $M_1$  and  $M_2$  atoms in eV for 4d-4d  $M_1M_2$ -NC in pH = 14.

|                | <b><math>M_1M_2</math>-NC-2</b> |                       | <b><math>M_1M_2</math>-NC-4</b> |                       |
|----------------|---------------------------------|-----------------------|---------------------------------|-----------------------|
|                | $U_{\text{dis}(M_1)}$           | $U_{\text{dis}(M_2)}$ | $U_{\text{dis}(M_1)}$           | $U_{\text{dis}(M_2)}$ |
| <b>TcRu-NC</b> | 0.41                            | 0.86                  | 0.62                            | 1.09                  |
| <b>TcRh-NC</b> | 0.44                            | 1.37                  | 0.70                            | 1.28                  |
| <b>TcPd-NC</b> | 0.40                            | 1.48                  | 0.69                            | 1.07                  |
| <b>TcCd-NC</b> | 0.35                            | 0.16                  | 0.84                            | -0.16                 |
| <b>TcAg-NC</b> | 0.43                            | 0.86                  | 0.74                            | 0.02                  |
| <b>RhRu-NC</b> | 1.67                            | 0.99                  | 1.46                            | 1.22                  |
| <b>PdRu-NC</b> | 1.82                            | 0.95                  | 1.09                            | 1.20                  |

|                |      |      |       |       |
|----------------|------|------|-------|-------|
| <b>CdRu-NC</b> | 0.38 | 0.82 | -0.24 | 1.32  |
| <b>AgRu-NC</b> | 1.32 | 0.93 | -0.08 | 1.20  |
| <b>RhPd-NC</b> | 1.70 | 2.12 | 1.44  | 1.11  |
| <b>RhAg-NC</b> | 1.54 | 1.71 | 1.15  | -0.64 |
| <b>RhCd-NC</b> | 1.41 | 0.61 | 1.46  | -0.39 |
| <b>AgPd-NC</b> | 1.69 | 1.74 | 0.36  | 1.33  |
| <b>CdPd-NC</b> | 0.54 | 1.55 | -0.26 | 1.26  |
| <b>CdAg-NC</b> | 0.46 | 1.15 | -0.19 | 0.36  |
| <b>2Tc-NC</b>  | 0.14 | 0.09 | 0.57  | 0.57  |
| <b>2Ru-NC</b>  | 1.03 | 0.90 | 1.10  | 1.10  |
| <b>2Rh-NC</b>  | 1.86 | 1.64 | 1.63  | 1.63  |
| <b>2Pd-NC</b>  | 2.04 | 1.83 | 1.35  | 1.35  |
| <b>2Ag-NC</b>  | 1.20 | 1.00 | 0.56  | 0.56  |
| <b>2Cd-NC</b>  | 0.55 | 0.37 | 0.10  | 0.10  |

**Table S40** The dissolution potential of  $M_1$  and  $M_2$  atoms in eV for 4d-5d  $M_1M_2$ -NC in pH = 14.

|                | <b><math>M_1M_2</math>-NC-2</b> |                      | <b><math>M_1M_2</math>-NC-4</b> |                      |
|----------------|---------------------------------|----------------------|---------------------------------|----------------------|
|                | $U_{\text{dis}(M1)}$            | $U_{\text{dis}(M2)}$ | $U_{\text{dis}(M1)}$            | $U_{\text{dis}(M2)}$ |
| <b>TcIr-NC</b> | 0.40                            | 1.05                 | 0.59                            | 1.12                 |
| <b>RhIr-NC</b> | 1.88                            | 1.23                 | 1.40                            | 1.21                 |
| <b>RuIr-NC</b> | 1.09                            | 1.11                 | 1.08                            | 1.14                 |
| <b>PdIr-NC</b> | 2.10                            | 1.24                 | 0.82                            | 1.09                 |
| <b>CdIr-NC</b> | 0.58                            | 1.18                 | -0.54                           | 1.17                 |
| <b>AgIr-NC</b> | 1.71                            | 1.16                 | -0.32                           | 1.17                 |
| <b>RhPt-NC</b> | 1.97                            | 2.00                 | 1.24                            | 1.21                 |
| <b>TcPt-NC</b> | 0.42                            | 1.61                 | 0.60                            | 1.18                 |
| <b>RuPt-NC</b> | 1.15                            | 1.76                 | 1.07                            | 1.21                 |
| <b>PdPt-NC</b> | 2.13                            | 1.96                 | 1.15                            | 1.45                 |
| <b>AgPt-NC</b> | 1.89                            | 1.88                 | -0.10                           | 1.40                 |



|                |      |      |       |      |
|----------------|------|------|-------|------|
| <b>CdPt-NC</b> | 0.67 | 1.91 | -0.41 | 1.40 |
| <b>TcOs-NC</b> | 0.38 | 0.58 | 0.51  | 0.80 |
| <b>RhOs-NC</b> | 1.56 | 0.65 | 1.25  | 0.91 |
| <b>RuOs-NC</b> | 0.97 | 0.60 | 0.98  | 0.83 |
| <b>PdOs-NC</b> | 1.75 | 0.65 | 0.84  | 0.87 |
| <b>CdOs-NC</b> | 0.33 | 0.64 | -0.37 | 1.02 |
| <b>AgOs-NC</b> | 1.38 | 0.67 | -0.26 | 0.95 |
| <b>RhRe-NC</b> | 1.17 | 0.26 | 1.45  | 0.42 |
| <b>TcRe-NC</b> | 0.24 | 0.14 | 0.55  | 0.33 |
| <b>RuRe-NC</b> | 0.75 | 0.25 | 1.06  | 0.35 |
| <b>PdRe-NC</b> | 1.26 | 0.23 | 1.03  | 0.40 |
| <b>CdRe-NC</b> | 0.05 | 0.23 | -0.12 | 0.50 |
| <b>AgRe-NC</b> | 0.56 | 0.24 | 0.22  | 0.46 |

**Table S41** The dissolution potential of  $M_1$  and  $M_2$  atoms in eV for 5d-5d  $M_1M_2$ -NC in pH = 14.

|                | <b><math>M_1M_2</math>-NC-2</b> |                       | <b><math>M_1M_2</math>-NC-4</b> |                       |
|----------------|---------------------------------|-----------------------|---------------------------------|-----------------------|
|                | $U_{\text{dis}(M_1)}$           | $U_{\text{dis}(M_2)}$ | $U_{\text{dis}(M_1)}$           | $U_{\text{dis}(M_2)}$ |
| <b>ReIr-NC</b> | 0.27                            | 0.99                  | 0.36                            | 1.13                  |
| <b>ReOs-NC</b> | 0.22                            | 0.49                  | 0.28                            | 0.76                  |
| <b>RePt-NC</b> | 0.24                            | 1.35                  | 0.34                            | 1.13                  |
| <b>OsIr-NC</b> | 0.65                            | 1.05                  | 0.79                            | 1.02                  |
| <b>OsPt-NC</b> | 0.79                            | 1.70                  | 0.76                            | 0.93                  |
| <b>PtIr-NC</b> | 2.24                            | 1.26                  | 0.91                            | 0.98                  |
| <b>2Re-NC</b>  | 0.07                            | 0.03                  | 0.32                            | 0.32                  |
| <b>2Os-NC</b>  | 0.67                            | 0.58                  | 0.72                            | 0.72                  |
| <b>2Ir-NC</b>  | 1.32                            | 1.20                  | 1.09                            | 1.09                  |
| <b>2Pt-NC</b>  | 2.28                            | 2.02                  | 1.22                            | 1.22                  |

**Table S42** The stability against leaching of 3d-3d  $M_1M_2$ -NC in the operating voltages of commercial catalysts in ORR, OER and HER at pH=0.

|                | $M_1M_2$ -NC-2 |     |     | $M_1M_2$ -NC-4 |     |     |
|----------------|----------------|-----|-----|----------------|-----|-----|
|                | ORR            | OER | HER | ORR            | OER | HER |
| <b>MnFe-NC</b> | ×              | ×   | √   | √              | ×   | √   |
| <b>MnCo-NC</b> | ×              | ×   | √   | ×              | ×   | √   |
| <b>NiMn-NC</b> | ×              | ×   | √   | ×              | ×   | √   |
| <b>CuMn-NC</b> | ×              | ×   | √   | ×              | ×   | √   |
| <b>ZnMn-NC</b> | ×              | ×   | √   | ×              | ×   | √   |
| <b>FeCo-NC</b> | √              | ×   | √   | √              | ×   | √   |
| <b>NiFe-NC</b> | √              | ×   | √   | √              | ×   | √   |
| <b>FeCu-NC</b> | √              | ×   | √   | √              | ×   | √   |
| <b>ZnFe-NC</b> | ×              | ×   | √   | ×              | ×   | √   |
| <b>NiCo-NC</b> | √              | ×   | √   | √              | ×   | √   |
| <b>CuCo-NC</b> | √              | ×   | √   | √              | ×   | √   |
| <b>ZnCo-NC</b> | ×              | ×   | √   | ×              | ×   | √   |
| <b>CuNi-NC</b> | √              | ×   | √   | √              | ×   | √   |
| <b>CuZn-NC</b> | ×              | ×   | √   | ×              | ×   | √   |
| <b>NiZn-NC</b> | ×              | ×   | √   | ×              | ×   | √   |
| <b>2Mn-NC</b>  | ×              | ×   | √   | ×              | ×   | √   |
| <b>2Fe-NC</b>  | √              | ×   | √   | √              | ×   | √   |
| <b>2Co-NC</b>  | √              | ×   | √   | √              | ×   | √   |
| <b>2Ni-NC</b>  | √              | ×   | √   | √              | ×   | √   |

|               |   |   |   |   |   |   |
|---------------|---|---|---|---|---|---|
| <b>2Cu-NC</b> | √ | × | √ | √ | × | √ |
| <b>2Zn-NC</b> | × | × | √ | × | × | √ |

**Table S43** The stability against leaching of 3d-4d  $M_1M_2$ -NC in the operating voltages of commercial catalysts in ORR, OER and HER at pH=0.

|                | $M_1M_2$ -NC-2 |     |     | $M_1M_2$ -NC-4 |     |     |
|----------------|----------------|-----|-----|----------------|-----|-----|
|                | ORR            | OER | HER | ORR            | OER | HER |
| <b>TcMn-NC</b> | ×              | ×   | √   | ×              | ×   | √   |
| <b>TcFe-NC</b> | ×              | ×   | √   | ×              | ×   | √   |
| <b>TcCo-NC</b> | ×              | ×   | √   | ×              | ×   | √   |
| <b>TcNi-NC</b> | ×              | ×   | √   | ×              | ×   | √   |
| <b>TcZn-NC</b> | ×              | ×   | √   | ×              | ×   | ×   |
| <b>TcCu-NC</b> | ×              | ×   | √   | ×              | ×   | √   |
| <b>RuMn-NC</b> | ×              | ×   | √   | ×              | ×   | √   |
| <b>RuFe-NC</b> | ×              | ×   | √   | ×              | ×   | √   |
| <b>RuCo-NC</b> | ×              | ×   | √   | ×              | ×   | √   |
| <b>RuNi-NC</b> | ×              | ×   | √   | ×              | ×   | √   |
| <b>RuZn-NC</b> | ×              | ×   | √   | ×              | ×   | ×   |
| <b>RuCu-NC</b> | ×              | ×   | √   | ×              | ×   | √   |
| <b>RhMn-NC</b> | ×              | ×   | √   | ×              | ×   | √   |
| <b>RhFe-NC</b> | √              | ×   | √   | ×              | ×   | √   |
| <b>RhCo-NC</b> | √              | ×   | √   | √              | ×   | √   |
| <b>RhNi-NC</b> | √              | ×   | √   | ×              | ×   | √   |
| <b>RhZn-NC</b> | ×              | ×   | √   | ×              | ×   | ×   |
| <b>RhCu-NC</b> | √              | ×   | √   | ×              | ×   | √   |

|                |   |   |   |   |   |   |
|----------------|---|---|---|---|---|---|
| <b>PdMn-NC</b> | × | × | √ | × | × | √ |
| <b>PdFe-NC</b> | √ | × | √ | √ | × | √ |
| <b>PdCo-NC</b> | √ | × | √ | √ | × | √ |
| <b>PdNi-NC</b> | √ | × | √ | √ | × | √ |
| <b>PdZn-NC</b> | × | × | √ | × | × | √ |
| <b>PdCu-NC</b> | √ | × | √ | √ | × | √ |
| <b>AgMn-NC</b> | × | × | √ | × | × | √ |
| <b>AgFe-NC</b> | √ | × | √ | √ | × | √ |
| <b>AgCo-NC</b> | √ | × | √ | × | × | √ |
| <b>AgNi-NC</b> | √ | × | √ | × | × | √ |
| <b>AgZn-NC</b> | × | × | √ | × | × | √ |
| <b>AgCu-NC</b> | √ | × | √ | × | × | √ |
| <b>CdMn-NC</b> | × | × | √ | × | × | × |
| <b>CdFe-NC</b> | × | × | √ | × | × | √ |
| <b>CdCo-NC</b> | × | × | √ | × | × | × |
| <b>CdNi-NC</b> | × | × | √ | × | × | × |
| <b>CdZn-NC</b> | × | × | √ | × | × | × |
| <b>CdCu-NC</b> | × | × | × | × | × | × |

**Table S44** The stability against leaching of 3d-5d  $M_1M_2$ -NC in the operating voltages of commercial catalysts in ORR, OER and HER at pH=0.

|                | $M_1M_2$ -NC-2 |     |     | $M_1M_2$ -NC-4 |     |     |
|----------------|----------------|-----|-----|----------------|-----|-----|
|                | ORR            | OER | HER | ORR            | OER | HER |
| <b>ReMn-NC</b> | ×              | ×   | ×   | ×              | ×   | √   |
| <b>ReFe-NC</b> | ×              | ×   | √   | ×              | ×   | √   |
| <b>ReCo-NC</b> | ×              | ×   | √   | ×              | ×   | √   |
| <b>ReNi-NC</b> | ×              | ×   | √   | ×              | ×   | √   |
| <b>ReZn-NC</b> | ×              | ×   | √   | ×              | ×   | ×   |
| <b>ReCu-NC</b> | ×              | ×   | √   | ×              | ×   | √   |
| <b>OsMn-NC</b> | ×              | ×   | √   | ×              | ×   | ×   |

|                |   |   |   |   |   |   |
|----------------|---|---|---|---|---|---|
| <b>OsFe-NC</b> | × | × | √ | × | × | √ |
| <b>OsCo-NC</b> | √ | × | √ | × | × | √ |
| <b>OsNi-NC</b> | √ | × | √ | × | × | √ |
| <b>OsZn-NC</b> | × | × | √ | × | × | × |
| <b>OsCu-NC</b> | √ | × | √ | × | × | √ |
| <b>IrMn-NC</b> | × | × | √ | × | × | √ |
| <b>IrFe-NC</b> | √ | × | √ | × | × | √ |
| <b>IrCo-NC</b> | √ | × | √ | × | × | √ |
| <b>IrNi-NC</b> | √ | × | √ | × | × | √ |
| <b>IrZn-NC</b> | × | × | √ | × | × | × |
| <b>IrCu-NC</b> | √ | × | √ | × | × | √ |
| <b>PtMn-NC</b> | × | × | √ | × | × | √ |
| <b>PtFe-NC</b> | √ | × | √ | × | × | √ |
| <b>PtCo-NC</b> | √ | × | √ | √ | × | √ |
| <b>PtNi-NC</b> | √ | × | √ | √ | × | √ |
| <b>PtZn-NC</b> | × | × | √ | × | × | √ |
| <b>PtCu-NC</b> | √ | × | √ | × | × | √ |

**Table S45** The stability against leaching of 4d-4d  $M_1M_2$ -NC in the operating voltages of commercial catalysts in ORR, OER and HER at pH=0.

|                | <b><math>M_1M_2</math>-NC-2</b> |     |     | <b><math>M_1M_2</math>-NC-4</b> |     |     |
|----------------|---------------------------------|-----|-----|---------------------------------|-----|-----|
|                | ORR                             | OER | HER | ORR                             | OER | HER |
| <b>TcRu-NC</b> | ×                               | ×   | √   | √                               | ×   | √   |
| <b>TcRh-NC</b> | ×                               | ×   | √   | √                               | ×   | √   |
| <b>TcPd-NC</b> | ×                               | ×   | √   | √                               | ×   | √   |
| <b>TcCd-NC</b> | ×                               | ×   | ×   | ×                               | ×   | ×   |
| <b>TcAg-NC</b> | ×                               | ×   | √   | ×                               | ×   | ×   |
| <b>RhRu-NC</b> | √                               | ×   | √   | √                               | ×   | √   |
| <b>PdRu-NC</b> | ×                               | ×   | √   | √                               | ×   | √   |

|                |   |   |   |   |   |   |
|----------------|---|---|---|---|---|---|
| <b>CdRu-NC</b> | × | × | √ | × | × | × |
| <b>AgRu-NC</b> | × | × | √ | × | × | × |
| <b>RhPd-NC</b> | √ | × | √ | √ | × | √ |
| <b>RhAg-NC</b> | √ | × | √ | × | × | × |
| <b>RhCd-NC</b> | × | × | √ | × | × | × |
| <b>AgPd-NC</b> | √ | × | √ | × | × | √ |
| <b>CdPd-NC</b> | × | × | √ | × | × | × |
| <b>CdAg-NC</b> | × | × | √ | × | × | × |
| <b>2Tc-NC</b>  | × | × | √ | √ | × | √ |
| <b>2Ru-NC</b>  | × | × | √ | √ | × | √ |
| <b>2Rh-NC</b>  | √ | × | √ | √ | × | √ |
| <b>2Pd-NC</b>  | √ | × | √ | √ | × | √ |
| <b>2Ag-NC</b>  | × | × | √ | × | × | √ |
| <b>2Cd-NC</b>  | × | × | √ | × | × | × |

**Table S46** The stability against leaching of 4d-5d  $M_1M_2$ -NC in the operating voltages of commercial catalysts in ORR, OER and HER at pH=0.

|                | <b><math>M_1M_2</math>-NC-2</b> |     |     | <b><math>M_1M_2</math>-NC-4</b> |     |     |
|----------------|---------------------------------|-----|-----|---------------------------------|-----|-----|
|                | ORR                             | OER | HER | ORR                             | OER | HER |
| <b>TcIr-NC</b> | ×                               | ×   | √   | √                               | ×   | √   |
| <b>RhIr-NC</b> | √                               | ×   | √   | √                               | ×   | √   |
| <b>RuIr-NC</b> | √                               | ×   | √   | √                               | ×   | √   |
| <b>PdIr-NC</b> | √                               | ×   | √   | √                               | ×   | √   |
| <b>CdIr-NC</b> | ×                               | ×   | √   | ×                               | ×   | ×   |
| <b>AgIr-NC</b> | √                               | ×   | √   | ×                               | ×   | ×   |
| <b>RhPt-NC</b> | √                               | ×   | √   | √                               | ×   | √   |
| <b>TcPt-NC</b> | ×                               | ×   | √   | √                               | ×   | √   |
| <b>RuPt-NC</b> | √                               | ×   | √   | √                               | ×   | √   |
| <b>PdPt-NC</b> | √                               | √   | √   | √                               | ×   | √   |

|                |   |   |   |   |   |   |
|----------------|---|---|---|---|---|---|
| <b>AgPt-NC</b> | √ | × | √ | × | × | × |
| <b>CdPt-NC</b> | × | × | √ | × | × | × |
| <b>TcOs-NC</b> | × | × | √ | √ | × | √ |
| <b>RhOs-NC</b> | √ | × | √ | √ | × | √ |
| <b>RuOs-NC</b> | × | × | √ | √ | × | √ |
| <b>PdOs-NC</b> | × | × | √ | √ | × | √ |
| <b>CdOs-NC</b> | × | × | √ | × | × | × |
| <b>AgOs-NC</b> | √ | × | √ | × | × | × |
| <b>RhRe-NC</b> | × | × | √ | × | × | √ |
| <b>TcRe-NC</b> | × | × | √ | × | × | √ |
| <b>RuRe-NC</b> | × | × | √ | × | × | √ |
| <b>PdRe-NC</b> | × | × | √ | × | × | √ |
| <b>CdRe-NC</b> | × | × | × | × | × | × |
| <b>AgRe-NC</b> | × | × | √ | × | × | × |

**Table S47** The stability against leaching of 5d-5d  $M_1M_2$ -NC in the operating voltages of commercial catalysts in ORR, OER and HER at pH=0.

|                | <b><math>M_1M_2</math>-NC-2</b> |     |     | <b><math>M_1M_2</math>-NC-4</b> |     |     |
|----------------|---------------------------------|-----|-----|---------------------------------|-----|-----|
|                | ORR                             | OER | HER | ORR                             | OER | HER |
| <b>ReIr-NC</b> | ×                               | ×   | √   | ×                               | ×   | √   |
| <b>ReOs-NC</b> | ×                               | ×   | √   | ×                               | ×   | √   |
| <b>RePt-NC</b> | ×                               | ×   | √   | ×                               | ×   | √   |
| <b>OsIr-NC</b> | √                               | ×   | √   | √                               | ×   | √   |
| <b>OsPt-NC</b> | √                               | ×   | √   | √                               | ×   | √   |
| <b>PtIr-NC</b> | √                               | ×   | √   | √                               | ×   | √   |
| <b>2Re-NC</b>  | ×                               | ×   | ×   | ×                               | ×   | √   |
| <b>2Os-NC</b>  | ×                               | ×   | √   | √                               | ×   | √   |
| <b>2Ir-NC</b>  | √                               | ×   | √   | √                               | ×   | √   |
| <b>2Pt-NC</b>  | √                               | √   | √   | √                               | ×   | √   |

**Table S48** The stability against leaching of 3d-3d  $M_1M_2$ -NC in the operating voltages of commercial catalysts in ORR, OER and HER at pH=14.

|                | $M_1M_2$ -NC-2 |     |     | $M_1M_2$ -NC-4 |     |     |
|----------------|----------------|-----|-----|----------------|-----|-----|
|                | ORR            | OER | HER | ORR            | OER | HER |
| <b>MnFe-NC</b> | √              | ×   | √   | √              | ×   | √   |
| <b>MnCo-NC</b> | √              | ×   | √   | ×              | ×   | √   |
| <b>NiMn-NC</b> | √              | ×   | √   | √              | ×   | √   |
| <b>CuMn-NC</b> | √              | ×   | √   | √              | ×   | √   |
| <b>ZnMn-NC</b> | √              | ×   | √   | ×              | ×   | √   |
| <b>FeCo-NC</b> | √              | ×   | √   | √              | ×   | √   |
| <b>NiFe-NC</b> | √              | ×   | √   | √              | ×   | √   |
| <b>FeCu-NC</b> | √              | ×   | √   | √              | ×   | √   |
| <b>ZnFe-NC</b> | √              | ×   | √   | √              | ×   | √   |
| <b>NiCo-NC</b> | √              | ×   | √   | √              | ×   | √   |
| <b>CuCo-NC</b> | √              | ×   | √   | √              | ×   | √   |
| <b>ZnCo-NC</b> | √              | ×   | √   | ×              | ×   | √   |
| <b>CuNi-NC</b> | √              | ×   | √   | √              | ×   | √   |
| <b>CuZn-NC</b> | √              | ×   | √   | ×              | ×   | √   |
| <b>NiZn-NC</b> | √              | ×   | √   | ×              | ×   | √   |
| <b>2Mn-NC</b>  | ×              | ×   | √   | ×              | ×   | √   |
| <b>2Fe-NC</b>  | √              | ×   | √   | √              | ×   | √   |
| <b>2Co-NC</b>  | √              | ×   | √   | √              | ×   | √   |
| <b>2Ni-NC</b>  | √              | ×   | √   | √              | ×   | √   |
| <b>2Cu-NC</b>  | √              | ×   | √   | √              | ×   | √   |



|               |   |   |   |  |   |   |   |
|---------------|---|---|---|--|---|---|---|
| <b>2Zn-NC</b> | √ | × | √ |  | × | × | √ |
|---------------|---|---|---|--|---|---|---|

**Table S49** The stability against leaching of 3d-4d M<sub>1</sub>M<sub>2</sub>-NC in the operating voltages of commercial catalysts in ORR, OER and HER at pH=14.

|                | <b>M<sub>1</sub>M<sub>2</sub>-NC-2</b> |     |     | <b>M<sub>1</sub>M<sub>2</sub>-NC-4</b> |     |     |
|----------------|----------------------------------------|-----|-----|----------------------------------------|-----|-----|
|                | ORR                                    | OER | HER | ORR                                    | OER | HER |
| <b>TcMn-NC</b> | ×                                      | ×   | √   | ×                                      | ×   | √   |
| <b>TcFe-NC</b> | ×                                      | ×   | √   | √                                      | ×   | √   |
| <b>TcCo-NC</b> | ×                                      | ×   | √   | √                                      | ×   | √   |
| <b>TcNi-NC</b> | ×                                      | ×   | √   | √                                      | ×   | √   |
| <b>TcZn-NC</b> | ×                                      | ×   | √   | ×                                      | ×   | √   |
| <b>TcCu-NC</b> | ×                                      | ×   | √   | ×                                      | ×   | √   |
| <b>RuMn-NC</b> | √                                      | ×   | √   | ×                                      | ×   | √   |
| <b>RuFe-NC</b> | √                                      | ×   | √   | √                                      | ×   | √   |
| <b>RuCo-NC</b> | √                                      | ×   | √   | √                                      | ×   | √   |
| <b>RuNi-NC</b> | √                                      | ×   | √   | √                                      | ×   | √   |
| <b>RuZn-NC</b> | √                                      | ×   | √   | ×                                      | ×   | √   |
| <b>RuCu-NC</b> | √                                      | ×   | √   | ×                                      | ×   | √   |
| <b>RhMn-NC</b> | √                                      | ×   | √   | ×                                      | ×   | √   |
| <b>RhFe-NC</b> | √                                      | ×   | √   | √                                      | ×   | √   |
| <b>RhCo-NC</b> | √                                      | ×   | √   | √                                      | ×   | √   |
| <b>RhNi-NC</b> | √                                      | ×   | √   | √                                      | ×   | √   |
| <b>RhZn-NC</b> | √                                      | ×   | √   | ×                                      | ×   | √   |
| <b>RhCu-NC</b> | √                                      | ×   | √   | ×                                      | ×   | √   |
| <b>PdMn-NC</b> | √                                      | ×   | √   | √                                      | ×   | √   |
| <b>PdFe-NC</b> | √                                      | ×   | √   | √                                      | ×   | √   |

|                |   |   |   |   |   |   |
|----------------|---|---|---|---|---|---|
| <b>PdCo-NC</b> | √ | × | √ | √ | × | √ |
| <b>PdNi-NC</b> | √ | × | √ | √ | × | √ |
| <b>PdZn-NC</b> | √ | × | √ | × | × | √ |
| <b>PdCu-NC</b> | √ | × | √ | √ | × | √ |
| <b>AgMn-NC</b> | √ | × | √ | × | × | √ |
| <b>AgFe-NC</b> | √ | × | √ | √ | × | √ |
| <b>AgCo-NC</b> | √ | × | √ | × | × | √ |
| <b>AgNi-NC</b> | √ | × | √ | √ | × | √ |
| <b>AgZn-NC</b> | √ | × | √ | × | × | √ |
| <b>AgCu-NC</b> | √ | × | √ | √ | × | √ |
| <b>CdMn-NC</b> | × | × | √ | × | × | × |
| <b>CdFe-NC</b> | × | × | √ | × | × | √ |
| <b>CdCo-NC</b> | × | × | √ | × | × | × |
| <b>CdNi-NC</b> | × | × | √ | × | × | √ |
| <b>CdZn-NC</b> | √ | × | √ | × | × | √ |
| <b>CdCu-NC</b> | × | × | √ | × | × | √ |

**Table S50** The stability against leaching of 3d-5d  $M_1M_2$ -NC in the operating voltages of commercial catalysts in ORR, OER and HER at pH=14.

|                | $M_1M_2$ -NC-2 |     |     | $M_1M_2$ -NC-4 |     |     |
|----------------|----------------|-----|-----|----------------|-----|-----|
|                | ORR            | OER | HER | ORR            | OER | HER |
| <b>ReMn-NC</b> | ×              | ×   | √   | ×              | ×   | √   |
| <b>ReFe-NC</b> | ×              | ×   | √   | ×              | ×   | √   |
| <b>ReCo-NC</b> | ×              | ×   | √   | ×              | ×   | √   |
| <b>ReNi-NC</b> | ×              | ×   | √   | ×              | ×   | √   |
| <b>ReZn-NC</b> | ×              | ×   | √   | ×              | ×   | √   |
| <b>ReCu-NC</b> | ×              | ×   | √   | ×              | ×   | √   |
| <b>OsMn-NC</b> | ×              | ×   | √   | ×              | ×   | √   |
| <b>OsFe-NC</b> | ×              | ×   | √   | √              | ×   | √   |
| <b>OsCo-NC</b> | ×              | ×   | √   | √              | ×   | √   |

|                |   |   |   |   |   |   |
|----------------|---|---|---|---|---|---|
| <b>OsNi-NC</b> | × | × | √ | × | × | √ |
| <b>OsZn-NC</b> | × | × | √ | × | × | × |
| <b>OsCu-NC</b> | × | × | √ | × | × | √ |
| <b>IrMn-NC</b> | √ | × | √ | × | × | √ |
| <b>IrFe-NC</b> | √ | × | √ | √ | × | √ |
| <b>IrCo-NC</b> | √ | × | √ | √ | × | √ |
| <b>IrNi-NC</b> | √ | × | √ | √ | × | √ |
| <b>IrZn-NC</b> | √ | × | √ | × | × | × |
| <b>IrCu-NC</b> | √ | × | √ | × | × | √ |
| <b>PtMn-NC</b> | √ | × | √ | × | × | √ |
| <b>PtFe-NC</b> | √ | × | √ | √ | × | √ |
| <b>PtCo-NC</b> | √ | × | √ | √ | × | √ |
| <b>PtNi-NC</b> | √ | × | √ | √ | × | √ |
| <b>PtZn-NC</b> | √ | × | √ | × | × | √ |
| <b>PtCu-NC</b> | √ | × | √ | √ | × | √ |

**Table S51** The stability against leaching of 4d-4d  $M_1M_2$ -NC in the operating voltages of commercial catalysts in ORR, OER and HER at pH=14.

|                | <b><math>M_1M_2</math>-NC-2</b> |     |     | <b><math>M_1M_2</math>-NC-4</b> |     |     |
|----------------|---------------------------------|-----|-----|---------------------------------|-----|-----|
|                | ORR                             | OER | HER | ORR                             | OER | HER |
| <b>TcRu-NC</b> | ×                               | ×   | √   | √                               | ×   | √   |
| <b>TcRh-NC</b> | ×                               | ×   | √   | √                               | ×   | √   |
| <b>TcPd-NC</b> | ×                               | ×   | √   | ×                               | ×   | √   |
| <b>TcCd-NC</b> | ×                               | ×   | √   | ×                               | ×   | ×   |
| <b>TcAg-NC</b> | ×                               | ×   | √   | ×                               | ×   | √   |
| <b>RhRu-NC</b> | √                               | ×   | √   | √                               | ×   | √   |
| <b>PdRu-NC</b> | √                               | ×   | √   | √                               | ×   | √   |
| <b>CdRu-NC</b> | ×                               | ×   | √   | ×                               | ×   | ×   |
| <b>AgRu-NC</b> | √                               | ×   | √   | ×                               | ×   | √   |

|                |   |   |   |   |   |   |
|----------------|---|---|---|---|---|---|
| <b>RhPd-NC</b> | √ | × | √ | √ | × | √ |
| <b>RhAg-NC</b> | √ | × | √ | × | × | × |
| <b>RhCd-NC</b> | × | × | √ | × | × | × |
| <b>AgPd-NC</b> | √ | × | √ | × | × | √ |
| <b>CdPd-NC</b> | × | × | √ | × | × | × |
| <b>CdAg-NC</b> | × | × | √ | × | × | × |
| <b>2Tc-NC</b>  | × | × | √ | × | × | √ |
| <b>2Ru-NC</b>  | √ | × | √ | √ | × | √ |
| <b>2Rh-NC</b>  | √ | × | √ | √ | × | √ |
| <b>2Pd-NC</b>  | √ | × | √ | √ | × | √ |
| <b>2Ag-NC</b>  | √ | × | √ | × | × | √ |
| <b>2Cd-NC</b>  | × | × | √ | × | × | √ |

**Table S52** The stability against leaching of 4d-5d  $M_1M_2$ -NC in the operating voltages of commercial catalysts in ORR, OER and HER at pH=14.

|                | <b><math>M_1M_2</math>-NC-2</b> |     |     | <b><math>M_1M_2</math>-NC-4</b> |     |     |
|----------------|---------------------------------|-----|-----|---------------------------------|-----|-----|
|                | ORR                             | OER | HER | ORR                             | OER | HER |
| <b>TcIr-NC</b> | ×                               | ×   | √   | ×                               | ×   | √   |
| <b>RhIr-NC</b> | √                               | ×   | √   | √                               | ×   | √   |
| <b>RuIr-NC</b> | √                               | ×   | √   | √                               | ×   | √   |
| <b>PdIr-NC</b> | √                               | ×   | √   | √                               | ×   | √   |
| <b>CdIr-NC</b> | ×                               | ×   | √   | ×                               | ×   | ×   |
| <b>AgIr-NC</b> | √                               | ×   | √   | ×                               | ×   | ×   |
| <b>RhPt-NC</b> | √                               | ×   | √   | √                               | ×   | √   |
| <b>TcPt-NC</b> | ×                               | ×   | √   | ×                               | ×   | √   |
| <b>RuPt-NC</b> | √                               | ×   | √   | √                               | ×   | √   |
| <b>PdPt-NC</b> | √                               | √   | √   | √                               | ×   | √   |
| <b>AgPt-NC</b> | √                               | √   | √   | ×                               | ×   | ×   |
| <b>CdPt-NC</b> | ×                               | ×   | √   | ×                               | ×   | ×   |

|                |   |   |   |   |   |   |
|----------------|---|---|---|---|---|---|
| <b>TcOs-NC</b> | × | × | √ | × | × | √ |
| <b>RhOs-NC</b> | × | × | √ | √ | × | √ |
| <b>RuOs-NC</b> | × | × | √ | √ | × | √ |
| <b>PdOs-NC</b> | × | × | √ | √ | × | √ |
| <b>CdOs-NC</b> | × | × | √ | × | × | × |
| <b>AgOs-NC</b> | × | × | √ | × | × | × |
| <b>RhRe-NC</b> | × | × | √ | × | × | √ |
| <b>TcRe-NC</b> | × | × | √ | × | × | √ |
| <b>RuRe-NC</b> | × | × | √ | × | × | √ |
| <b>PdRe-NC</b> | × | × | √ | × | × | √ |
| <b>CdRe-NC</b> | × | × | √ | × | × | × |
| <b>AgRe-NC</b> | × | × | √ | × | × | √ |

**Table S53** The stability against leaching of 5d-5d  $M_1M_2$ -NC in the operating voltages of commercial catalysts in ORR, OER and HER at pH = 14.

|                | <b><math>M_1M_2</math>-NC-2</b> |     |     | <b><math>M_1M_2</math>-NC-4</b> |     |     |
|----------------|---------------------------------|-----|-----|---------------------------------|-----|-----|
|                | ORR                             | OER | HER | ORR                             | OER | HER |
| <b>ReIr-NC</b> | ×                               | ×   | √   | ×                               | ×   | √   |
| <b>ReOs-NC</b> | ×                               | ×   | √   | ×                               | ×   | √   |
| <b>RePt-NC</b> | ×                               | ×   | √   | ×                               | ×   | √   |
| <b>OsIr-NC</b> | ×                               | ×   | √   | ×                               | ×   | √   |
| <b>OsPt-NC</b> | ×                               | ×   | √   | ×                               | ×   | √   |
| <b>PtIr-NC</b> | √                               | ×   | √   | √                               | ×   | √   |
| <b>2Re-NC</b>  | ×                               | ×   | √   | ×                               | ×   | √   |
| <b>2Os-NC</b>  | ×                               | ×   | √   | ×                               | ×   | √   |
| <b>2Ir-NC</b>  | √                               | ×   | √   | √                               | ×   | √   |
| <b>2Pt-NC</b>  | √                               | √   | √   | √                               | ×   | √   |

**Table S54** The data of  $Z_0$ , A, B, C, D and F for BACs.

|                    |          | $Z_0$   | a      | b      | c      | d     | f     |
|--------------------|----------|---------|--------|--------|--------|-------|-------|
| <b>3d metal</b>    | 3d-3d    | 12.73   | 0.63   | -7.99  | 0.20   | 1.03  | 0.032 |
| <b>dissolution</b> | 3d-4d/5d | -8.62   | 4.14   | 0.64   | -0.62  | -0.09 | 0.13  |
| <b>4d metal</b>    | 4d-3d    | -9.79   | 19.63  | -10.43 | -3.32  | 1.23  | 0.34  |
| <b>dissolution</b> | 4d-4d/5d | -5.75   | 2.94   | -0.20  | -0.27  | -0.03 | 0.14  |
| <b>5d metal</b>    | 5d-3d    | -461.00 | 331.71 | -9.21  | -57.64 | 1.00  | 0.54  |
| <b>dissolution</b> | 5d-4d/5d | -376.83 | 260.44 | 0.48   | -44.86 | -0.03 | -0.08 |

**Table S55** The operating voltage of BACs obtained from experiments. The calculated value and predicted value by structure descriptor of dissolution potential in this work.

|                | <b>Catalytic<br/>reaction</b> | <b>Operating<br/>voltage</b> | $U_{dis}$<br><b>(calculated value)</b> | $U_{dis}$<br><b>(predictive value)</b> |
|----------------|-------------------------------|------------------------------|----------------------------------------|----------------------------------------|
| <b>2Fe-NC</b>  | ORR                           | 0.78 V <sup>13</sup>         | 1.43 V                                 | 1.48 V                                 |
| <b>2Co-NC</b>  | ORR                           | 0.79 V <sup>14</sup>         | 1.24 V                                 | 1.36 V                                 |
| <b>2Cu-NC</b>  | CO <sub>2</sub> RR            | -0.70 V <sup>17</sup>        | 1.03 V                                 | 0.91V                                  |
| <b>2Ni-NC</b>  | CO <sub>2</sub> RR            | -0.60 V <sup>18</sup>        | 1.42 V                                 | 1.23 V                                 |
| <b>FeCu-NC</b> | ORR                           | 0.85 V <sup>19</sup>         | 1.03 V                                 | 1.10 V                                 |
| <b>FeNi-NC</b> | ORR                           | 0.79 V <sup>20</sup>         | 1.26 V                                 | 1.25 V                                 |
|                | CO <sub>2</sub> RR            | -0.70 V <sup>21</sup>        |                                        |                                        |
| <b>FeCo-NC</b> | ORR                           | 0.86 V <sup>22</sup>         | 1.14 V                                 | 1.35 V                                 |
| <b>NiCo-NC</b> | ORR                           | 0.76 V <sup>15</sup>         | 1.23 V                                 | 1.26 V                                 |
| <b>ZnCo-NC</b> | ORR                           | 0.80 V <sup>23</sup>         | 0.75 V                                 | 0.42 V                                 |
| <b>PdCu-NC</b> | NRR                           | -0.45 V <sup>24</sup>        | 0.82 V                                 | 0.67 V                                 |
| <b>PtCo-NC</b> | ORR                           | 0.96 V <sup>25</sup>         | 1.33 V                                 | 0.62 V                                 |
| <b>PtRu-NC</b> | HER                           | -0.05 V <sup>16</sup>        | 0.90 V                                 | 1.16 V                                 |

## Supplementary Figures

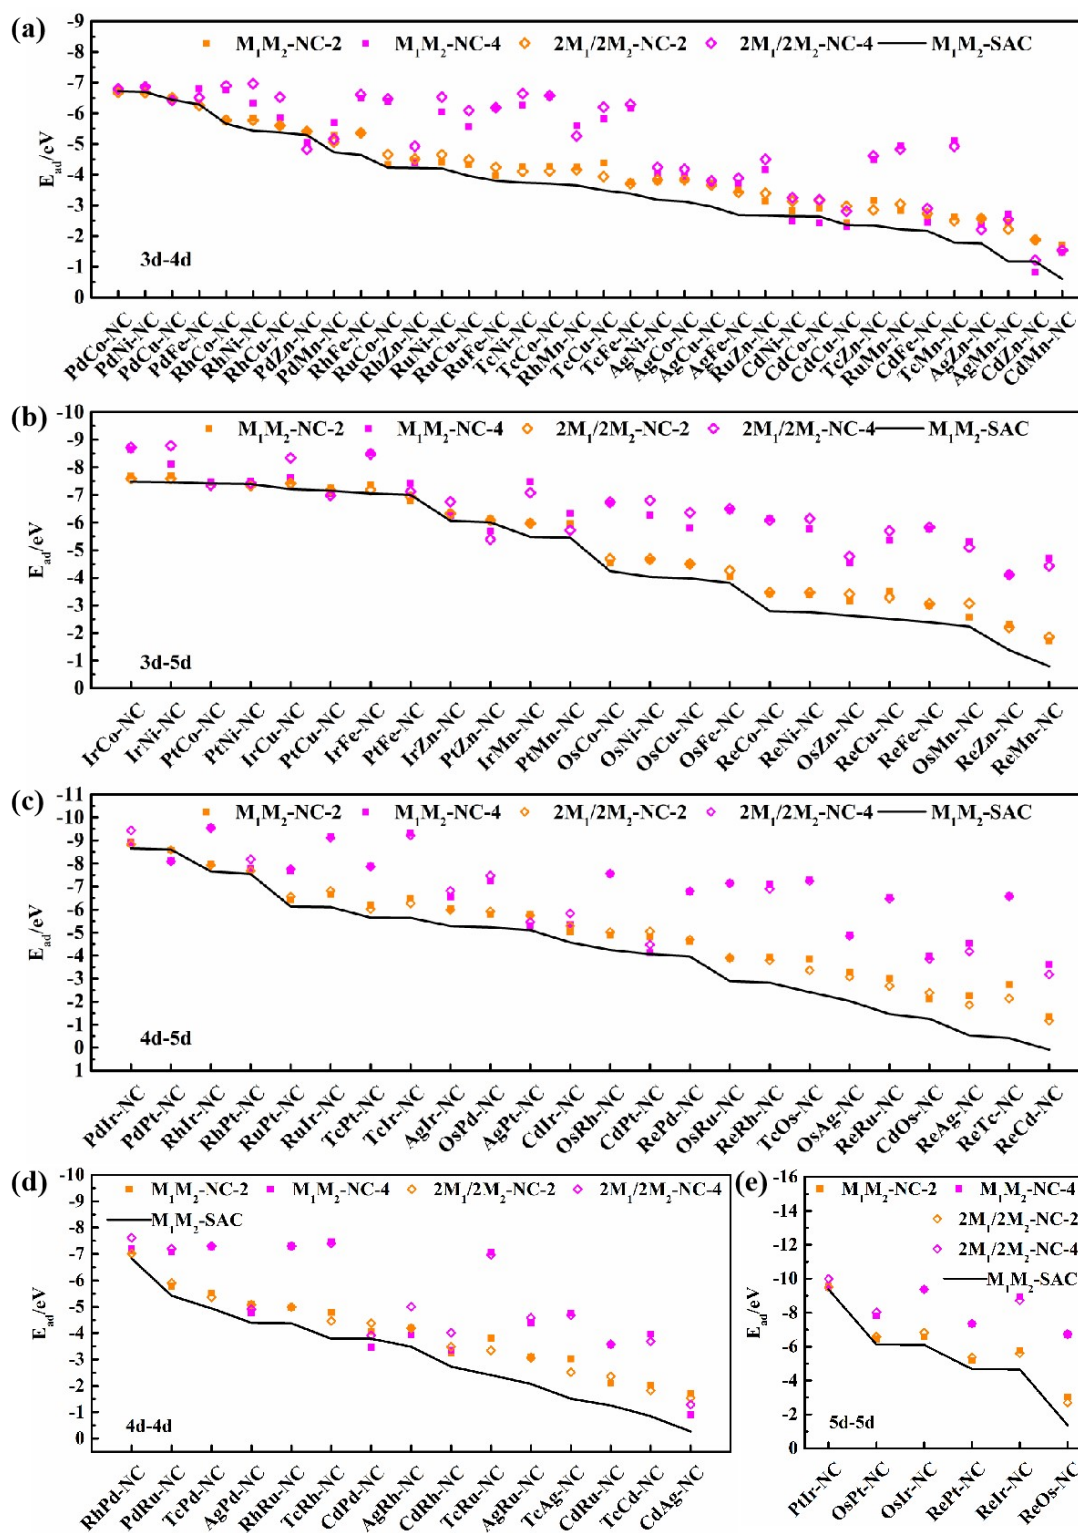

**Figure S1.** Adsorption energy of  $M_1M_2$ -NC,  $2M_1$ -NC/ $2M_2$ -NC and  $M_1M_2$ -SAC, which are denoted as square, rhombus and line respectively. (a~e) represent for 3d-4d, 3d-5d, 4d-5d, 4d-4d and 5d-5d atoms supported on graphene, respectively. Orange and purple represent configurations 2 and 4. The average adsorption energy of  $2M_1$ -NC/ $2M_2$ -NC is the average of the average adsorption energy

of  $2M_1$ -NC and  $2M_2$ -NC.

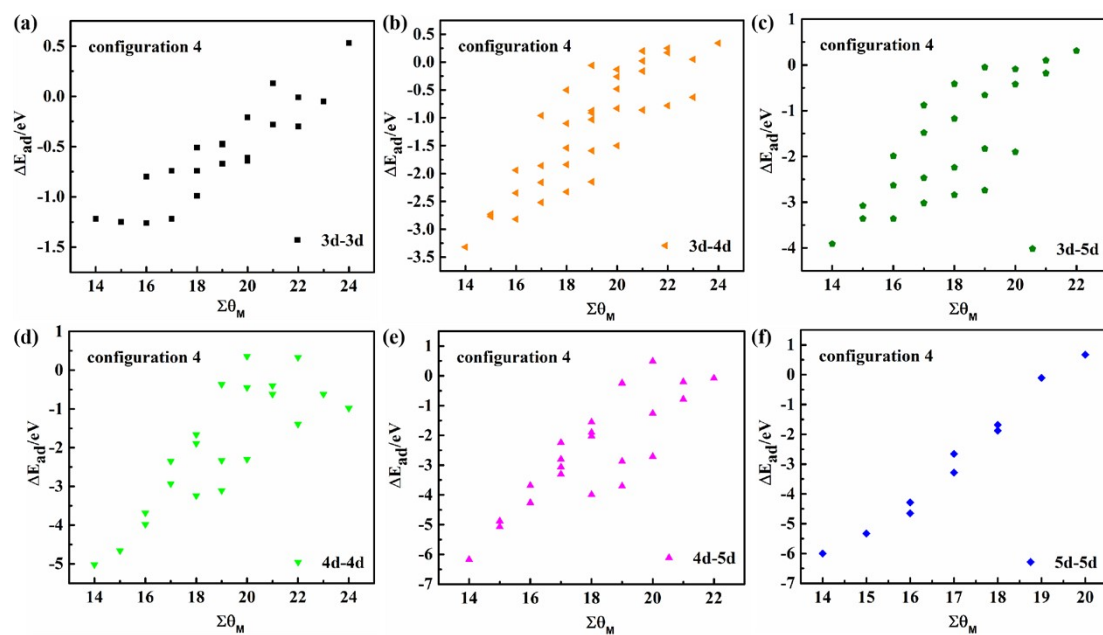

**Figure S2.** Correlation between  $\Delta E_{ad}^{SAC}$  with the sum of the number of valence electrons of transition metal atoms.

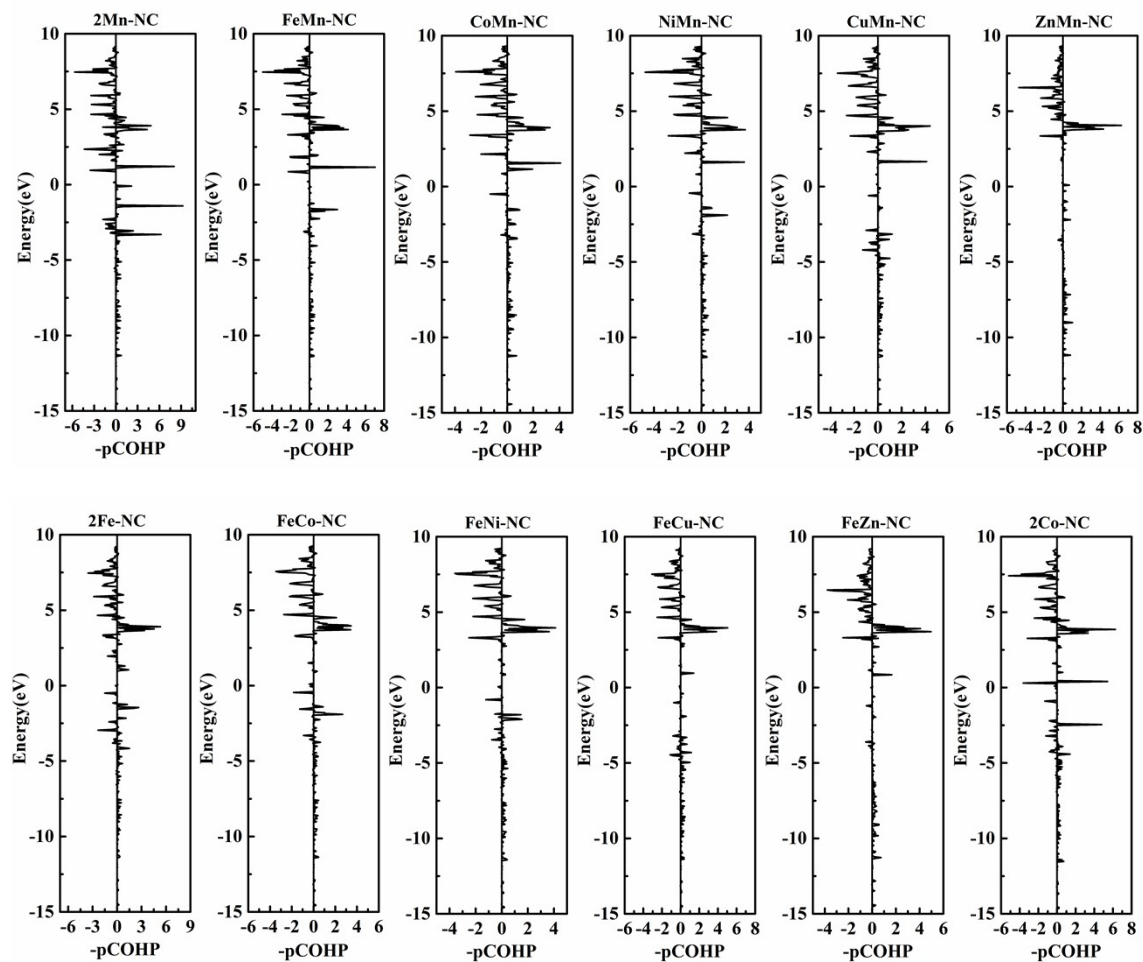



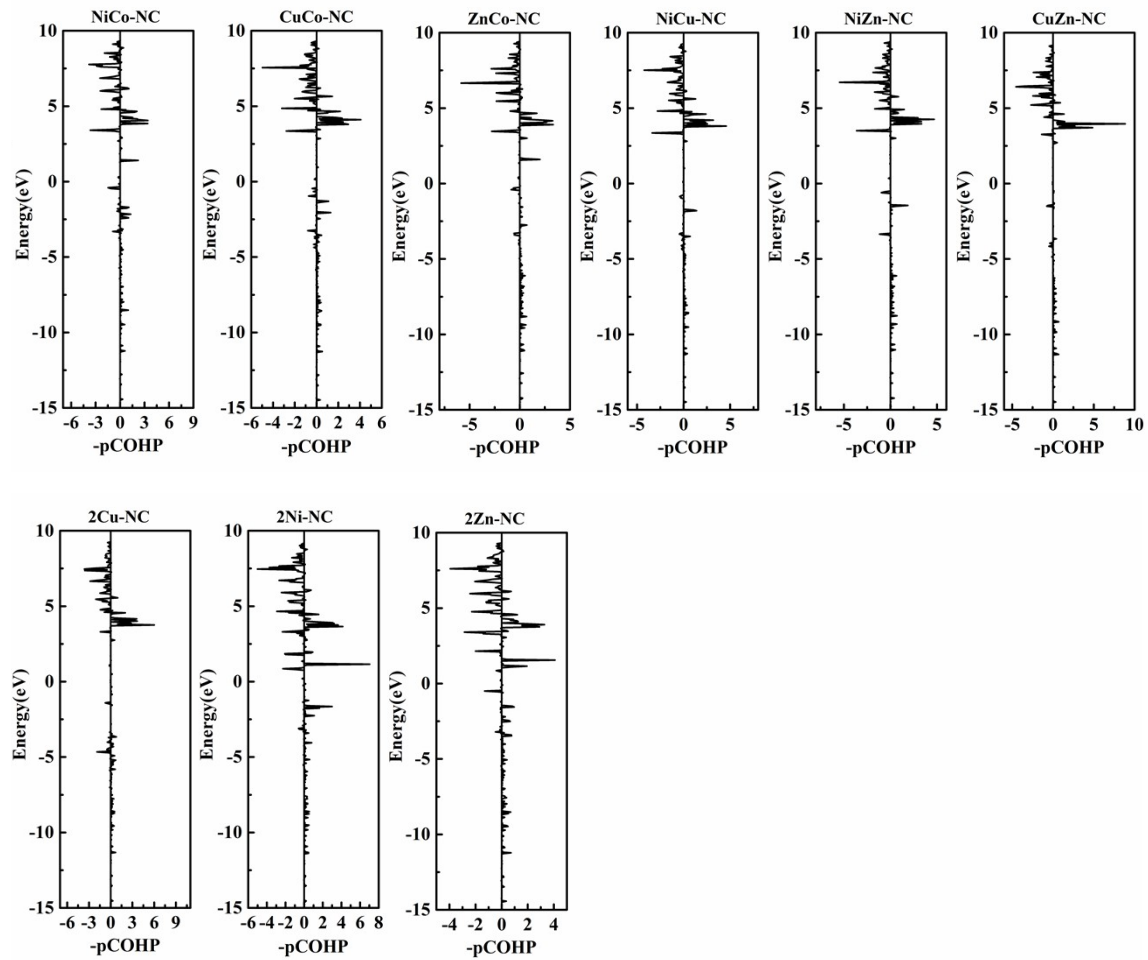

**Figure S3.** Crystal orbital Hamilton population (COHP) between  $M_1$ - $M_2$  on 3d-3d  $M_1M_2$ -NC.

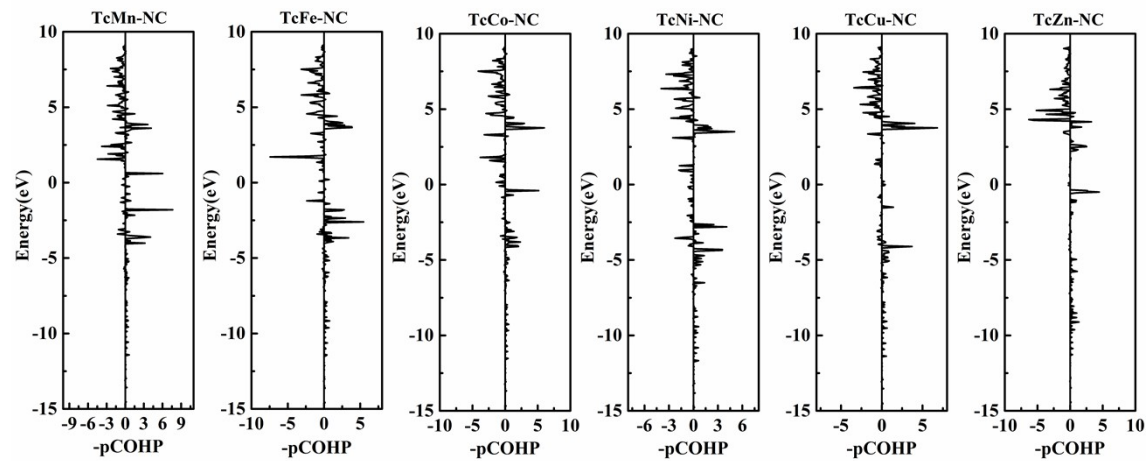

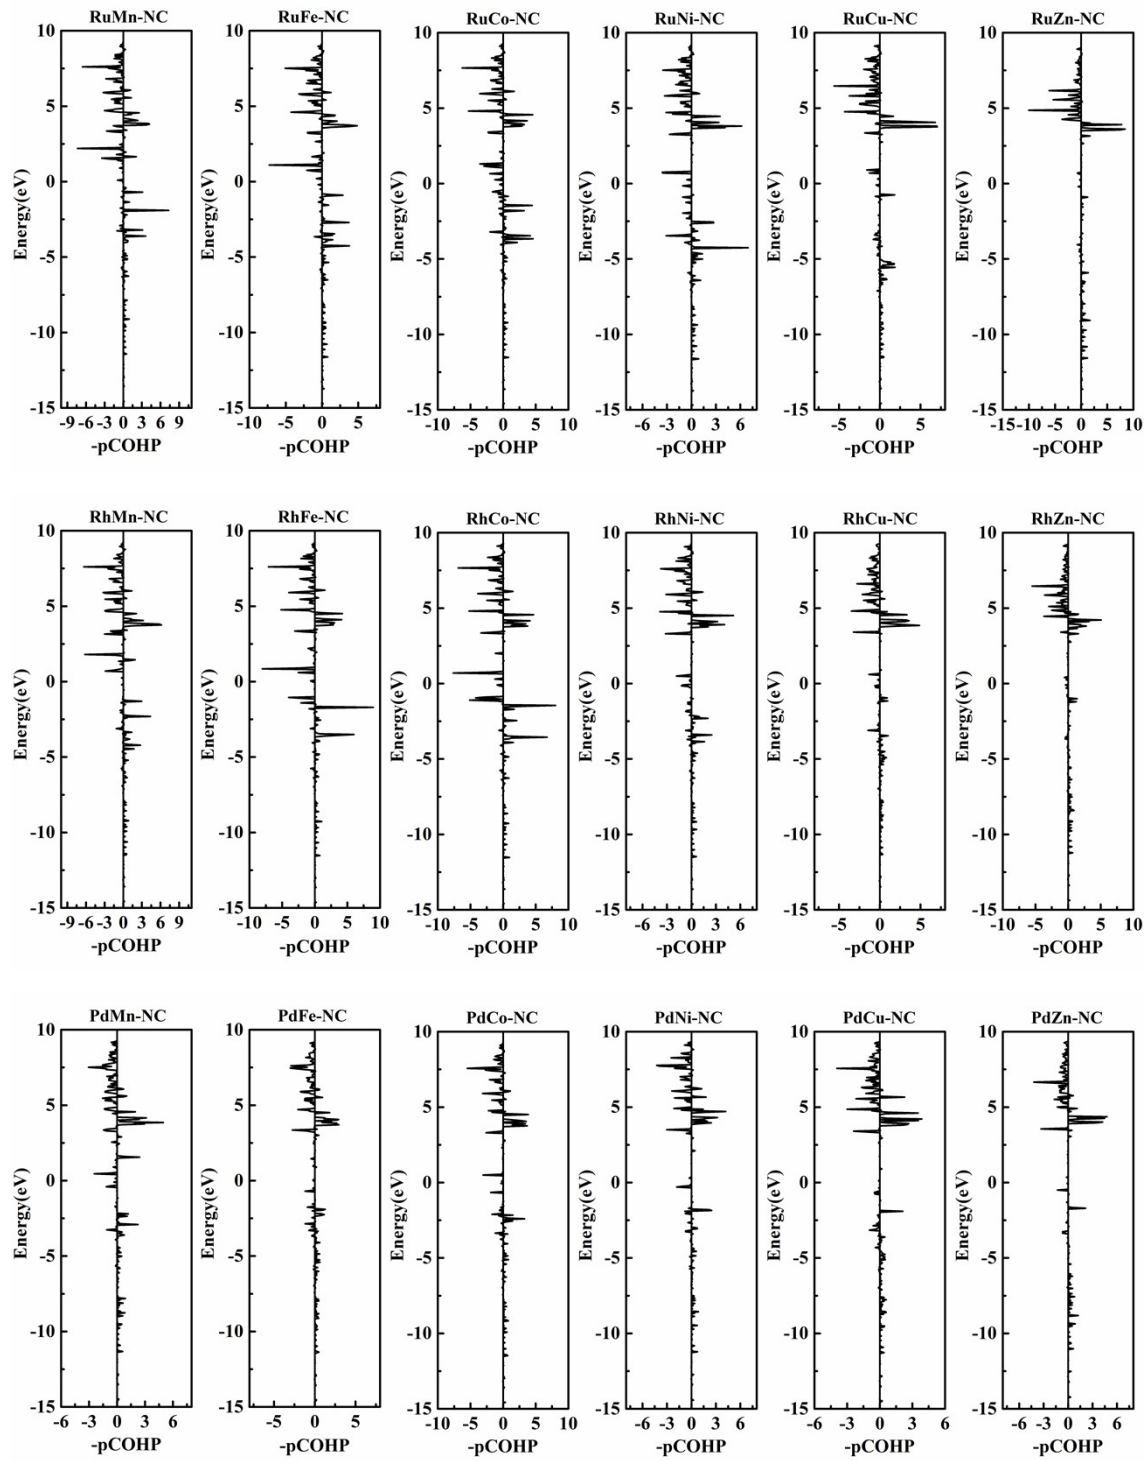

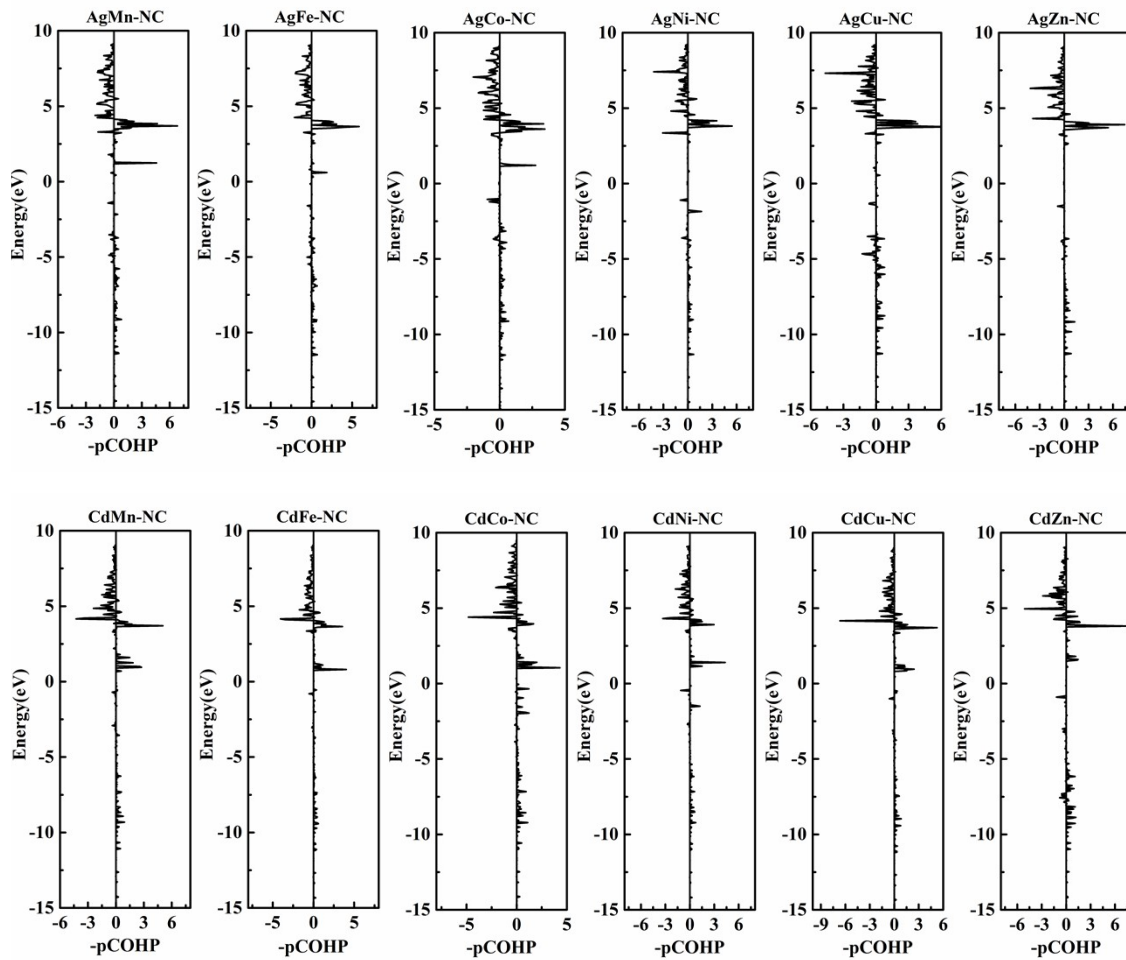

**Figure S4.** Crystal orbital Hamilton population (COHP) between  $M_1$ - $M_2$  on 3d-4d  $M_1M_2$ -NC.

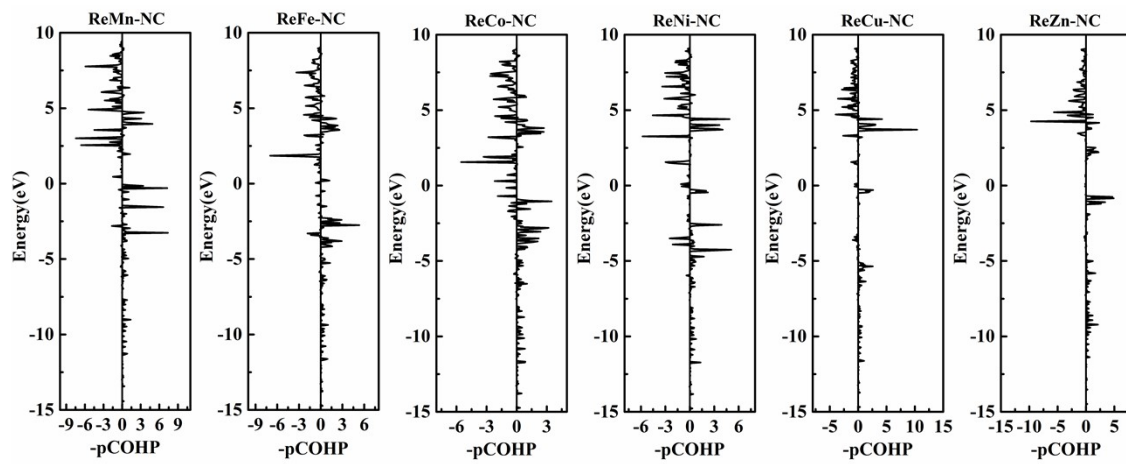

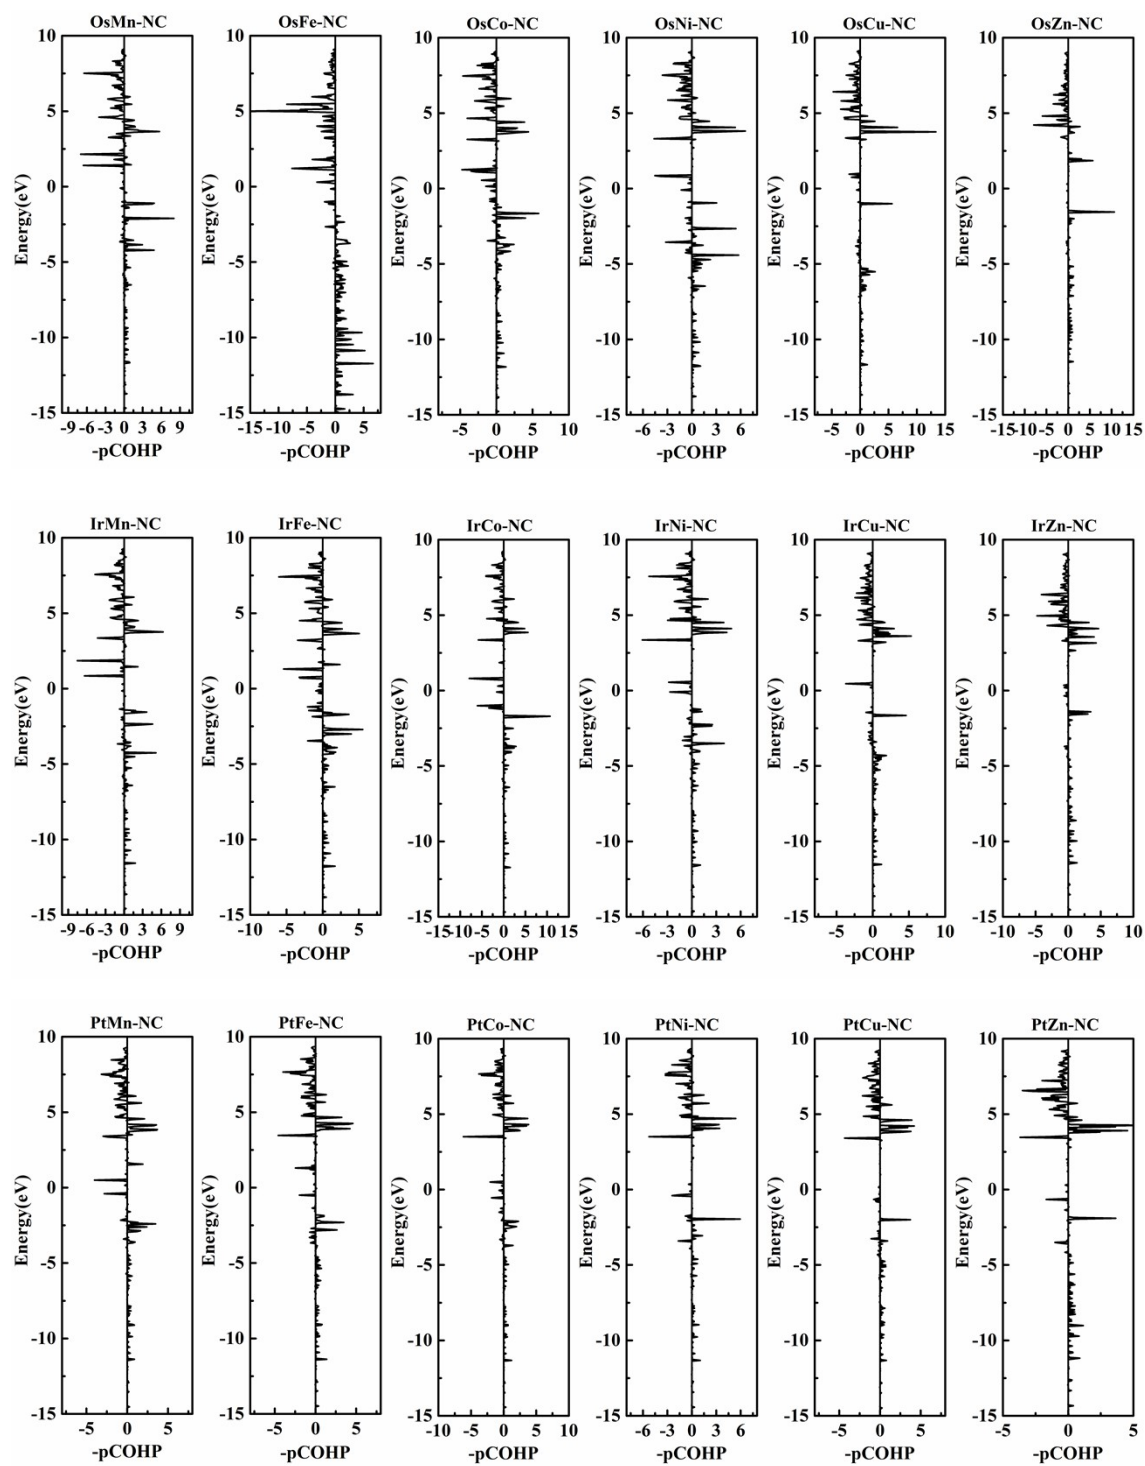

**Figure S5.** Crystal orbital Hamilton population (COHP) between  $M_1$ - $M_2$  on 3d-5d  $M_1M_2$ -NC.

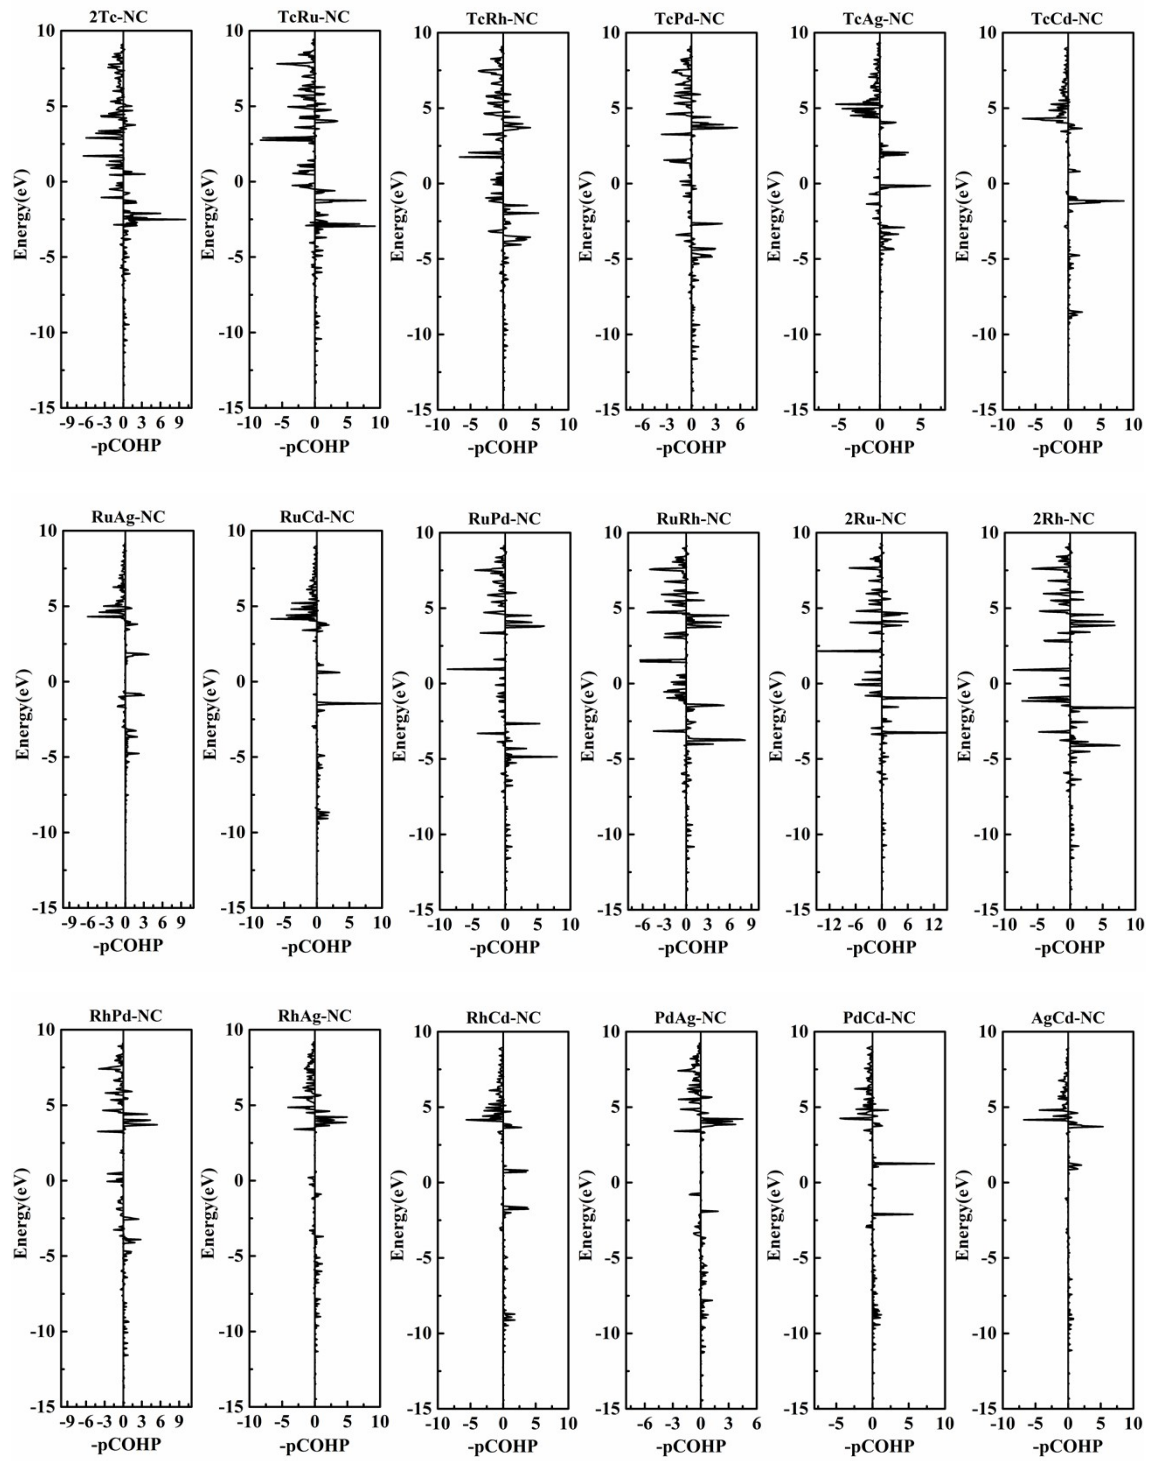

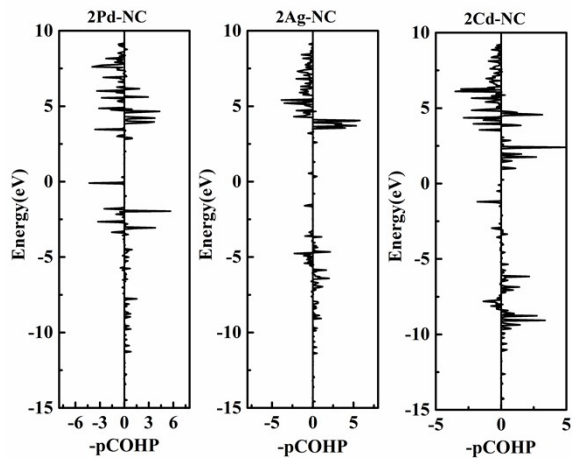

**Figure S6.** Crystal orbital Hamilton population (COHP) between  $M_1$ - $M_2$  on 4d-4d  $M_1M_2$ -NC.

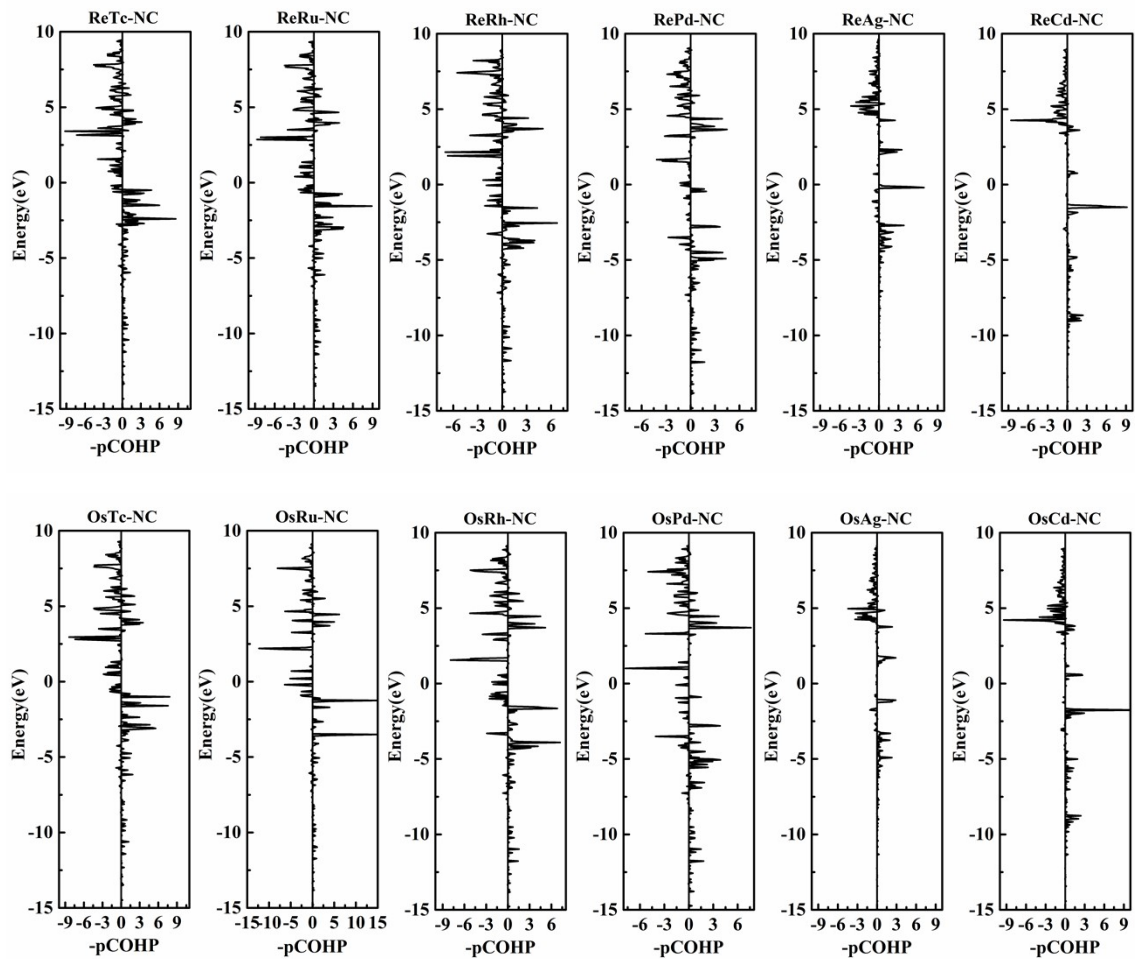

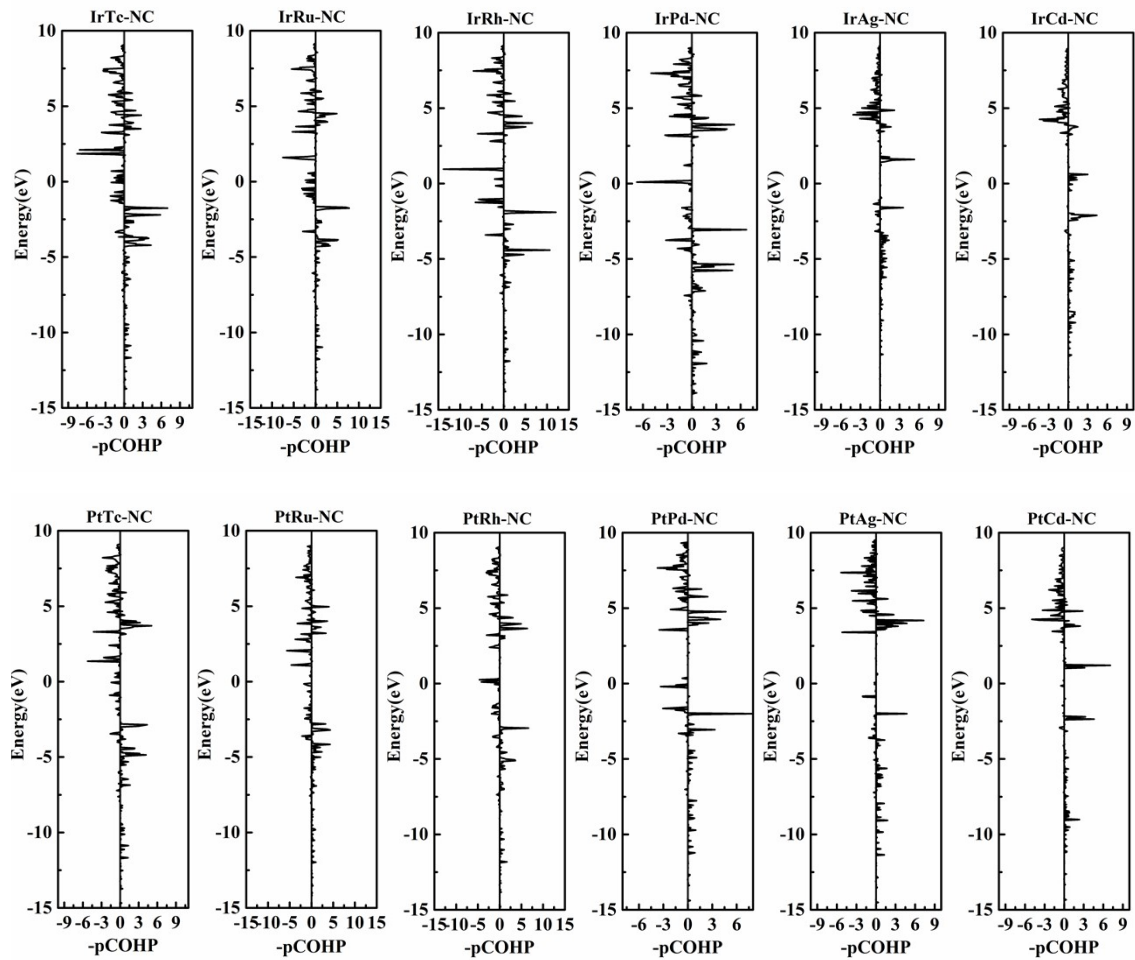

**Figure S7.** Crystal orbital Hamilton population (COHP) between  $M_1$ - $M_2$  on 4d-5d  $M_1M_2$ -NC.

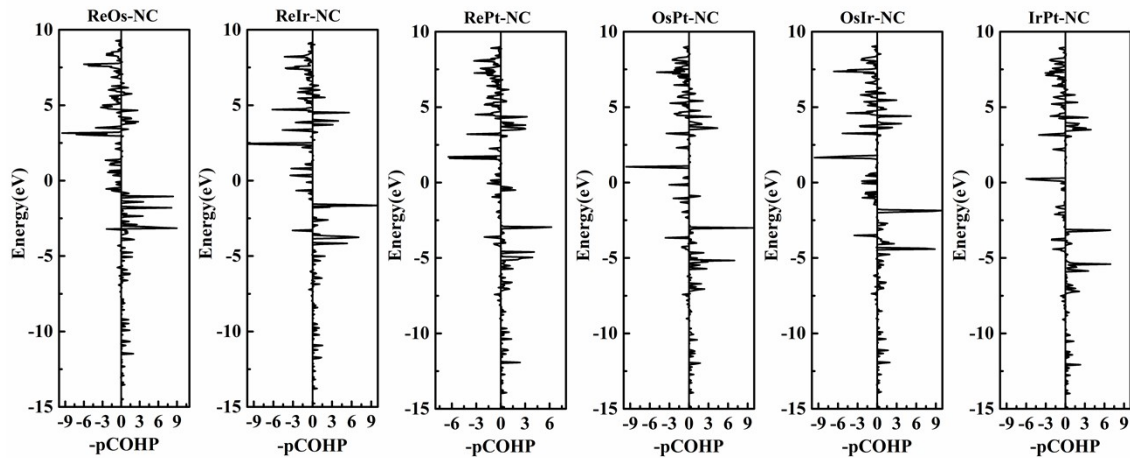

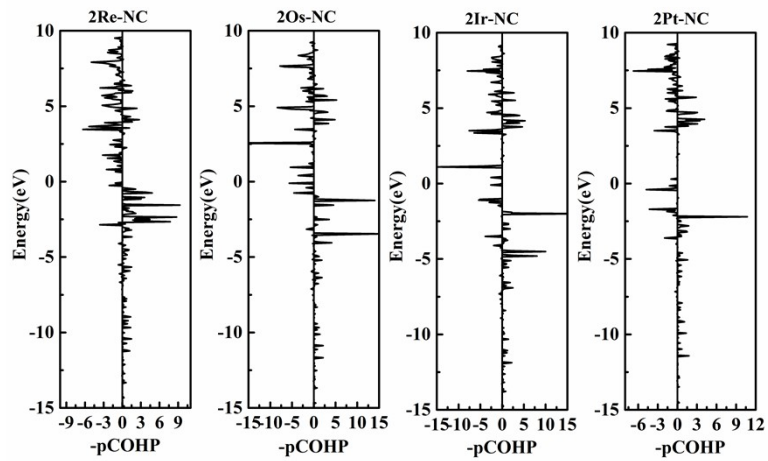

**Figure S8.** Crystal orbital Hamilton population (COHP) between  $M_1$ - $M_2$  on 5d-5d  $M_1M_2$ -NC.

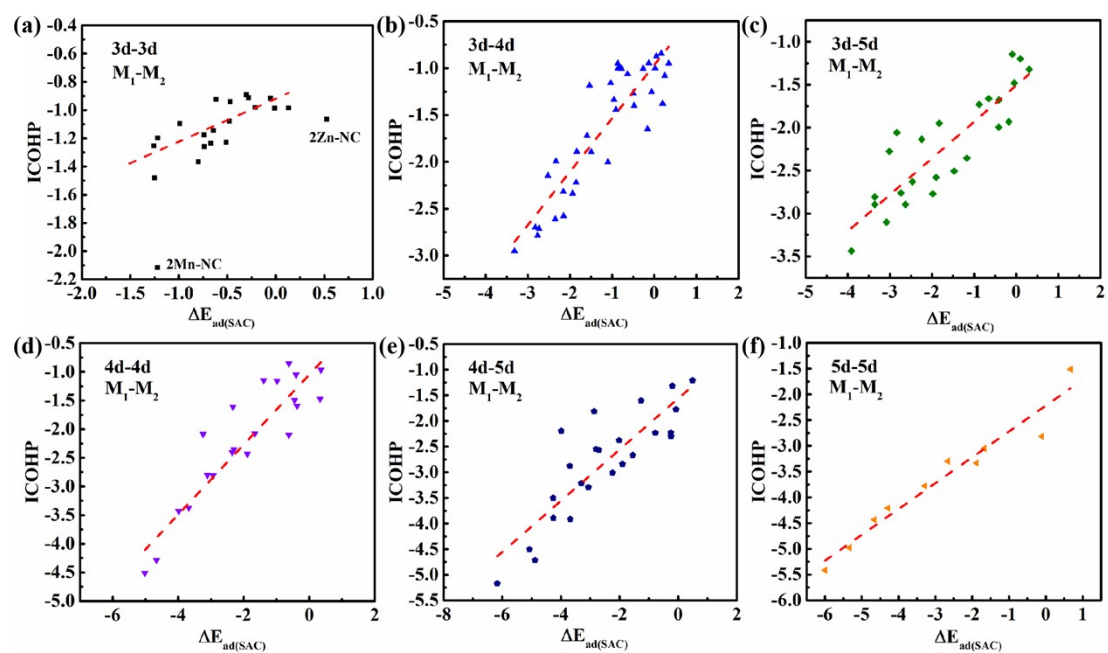

**Figure S9.** Correlation between  $\Delta E_{ad}(SAC)$  with integrated crystal orbital Hamilton population (ICOHP) of  $M_1$ - $M_2$ .



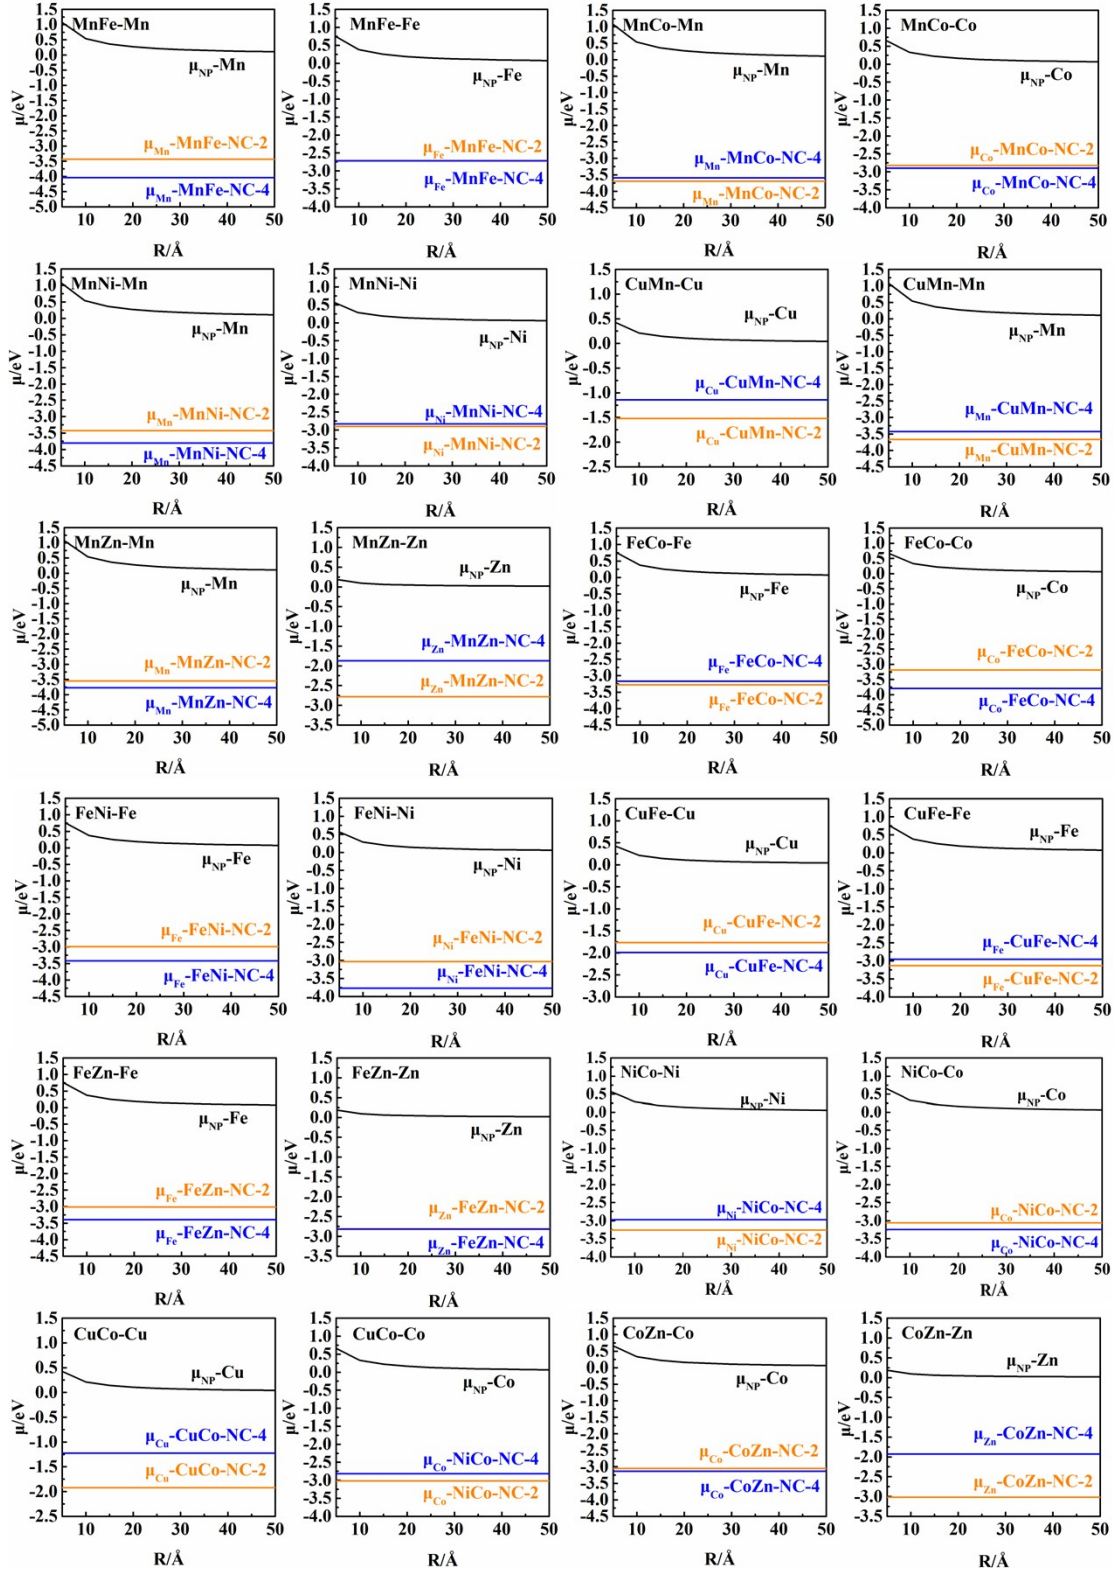

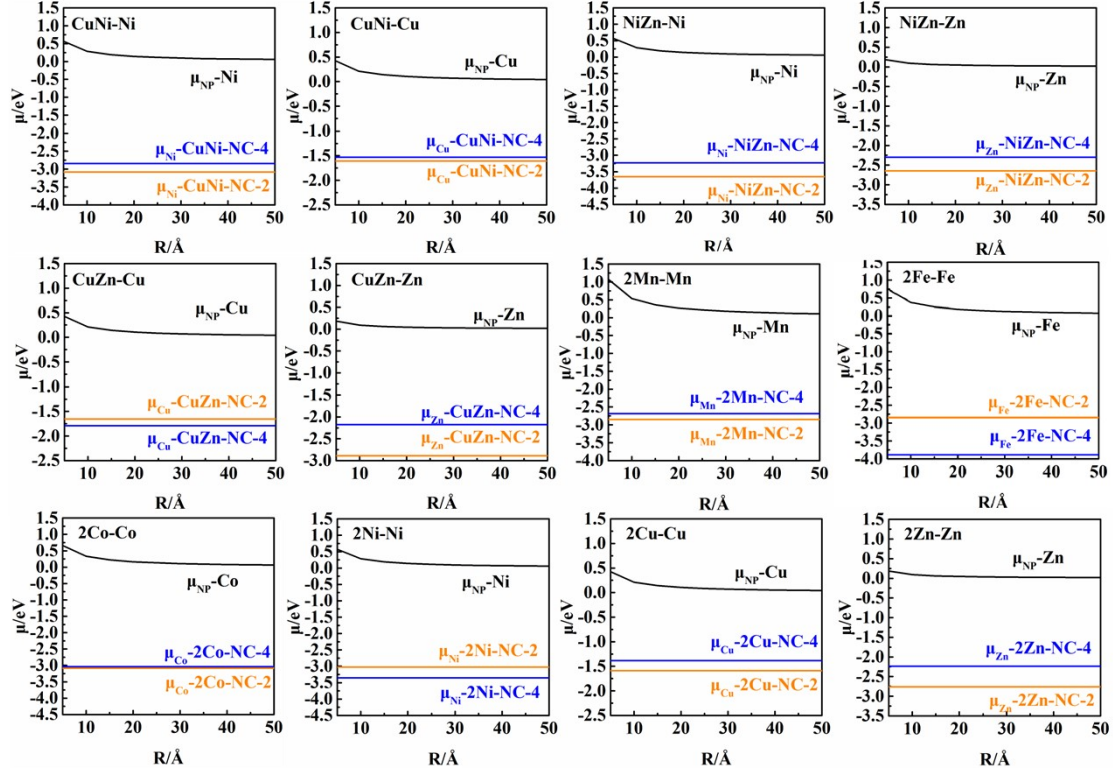

**Figure S10.** Chemical potential of NPs and single atom of 3d-3d BACs in vacuum.

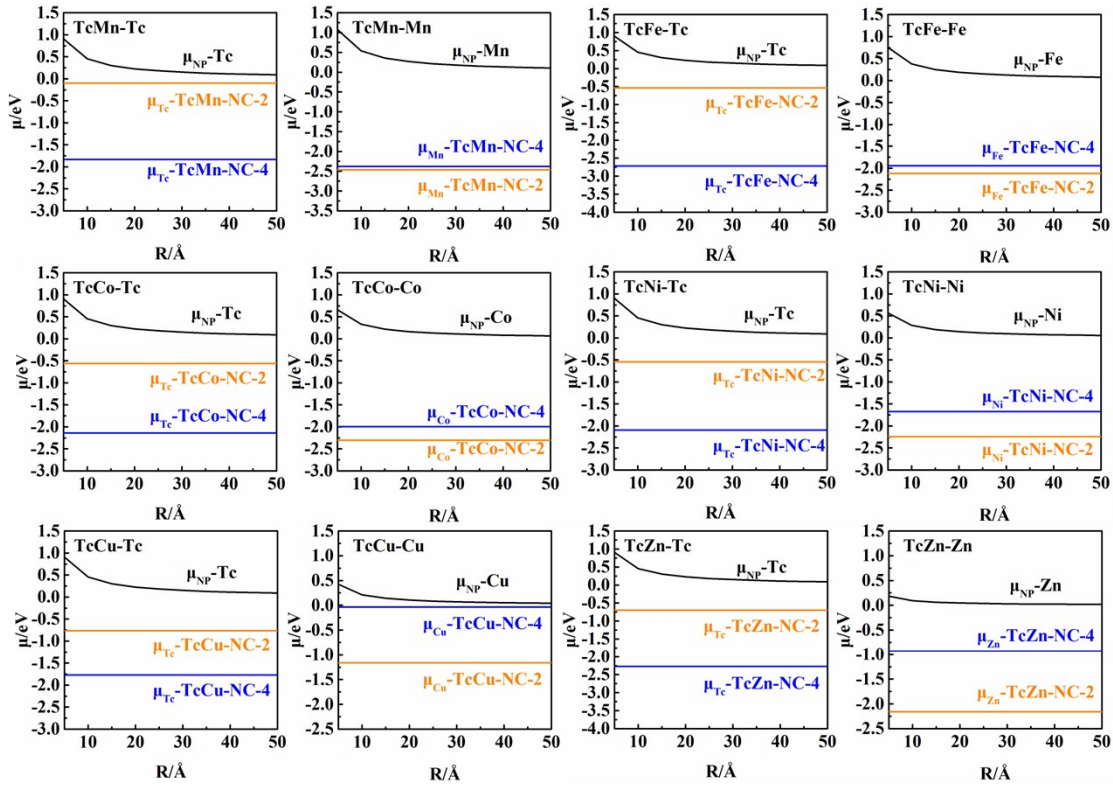

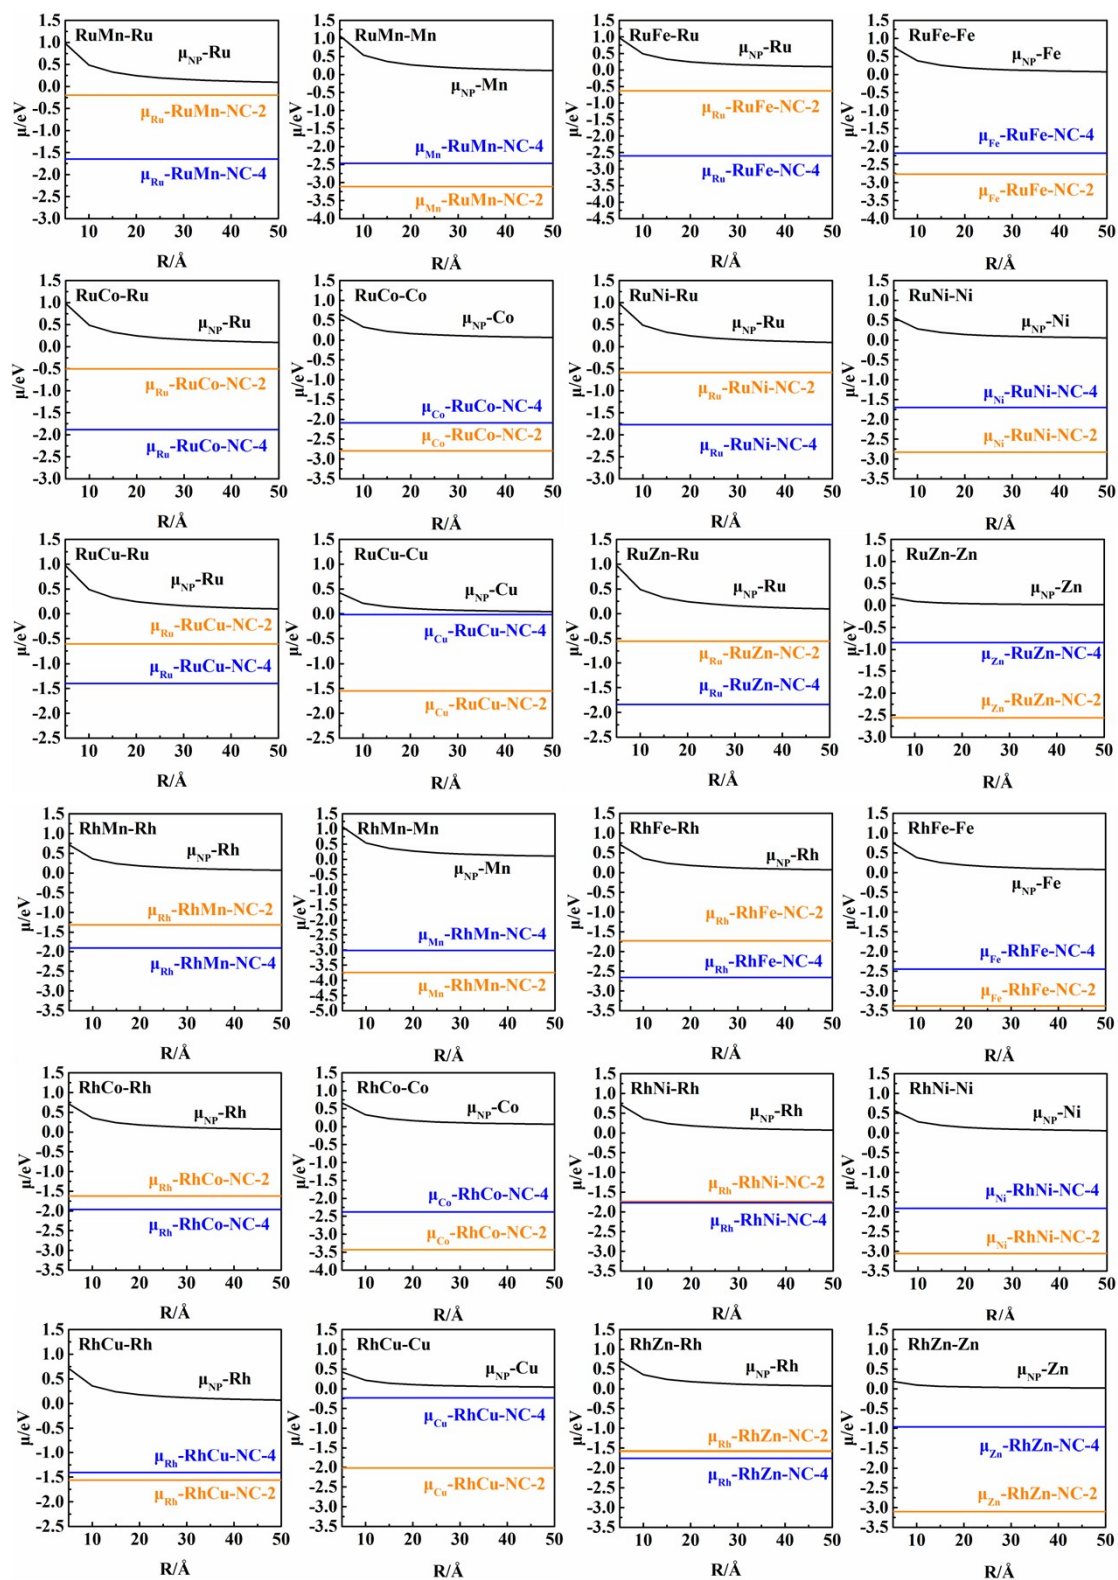

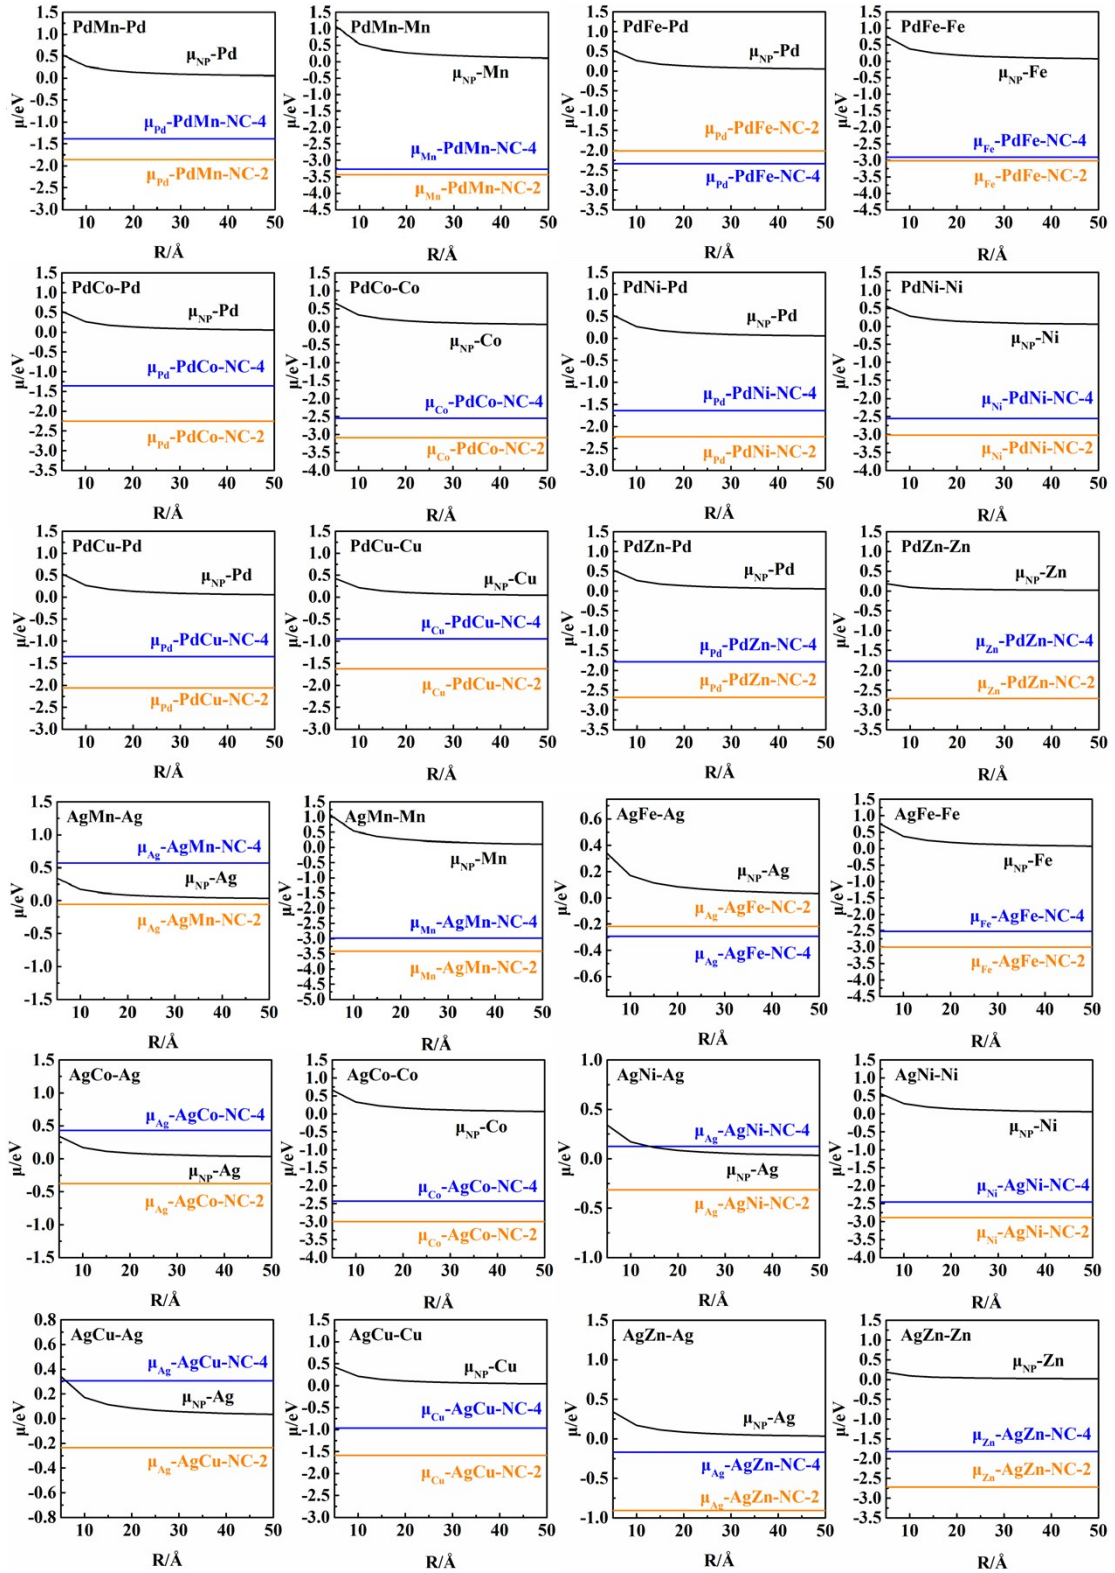

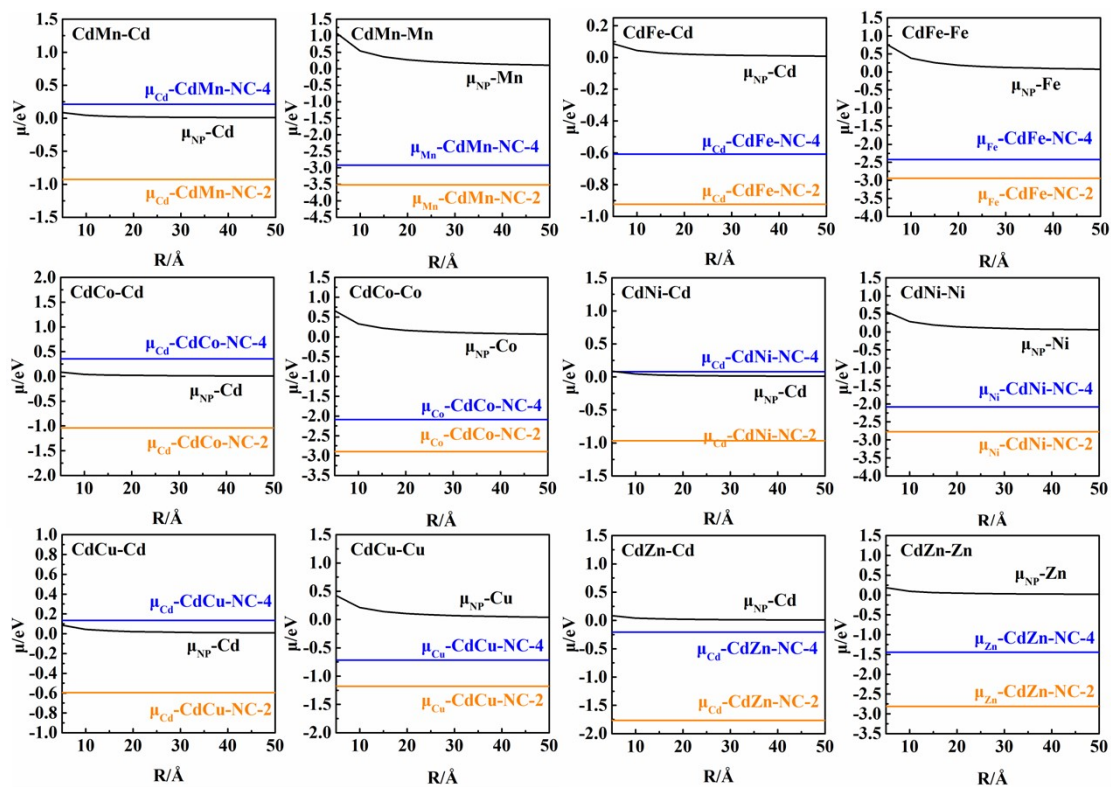

**Figure S11.** Chemical potential of NPs and single atom of 3d-4d BACs in vacuum.

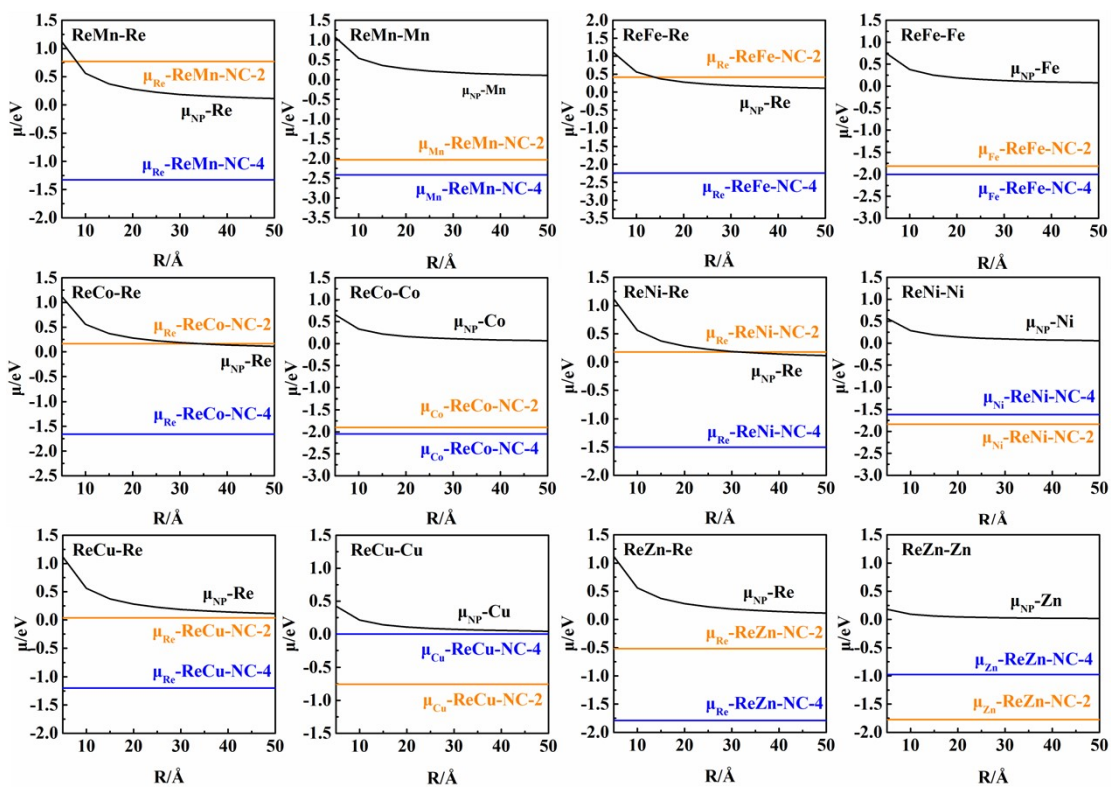

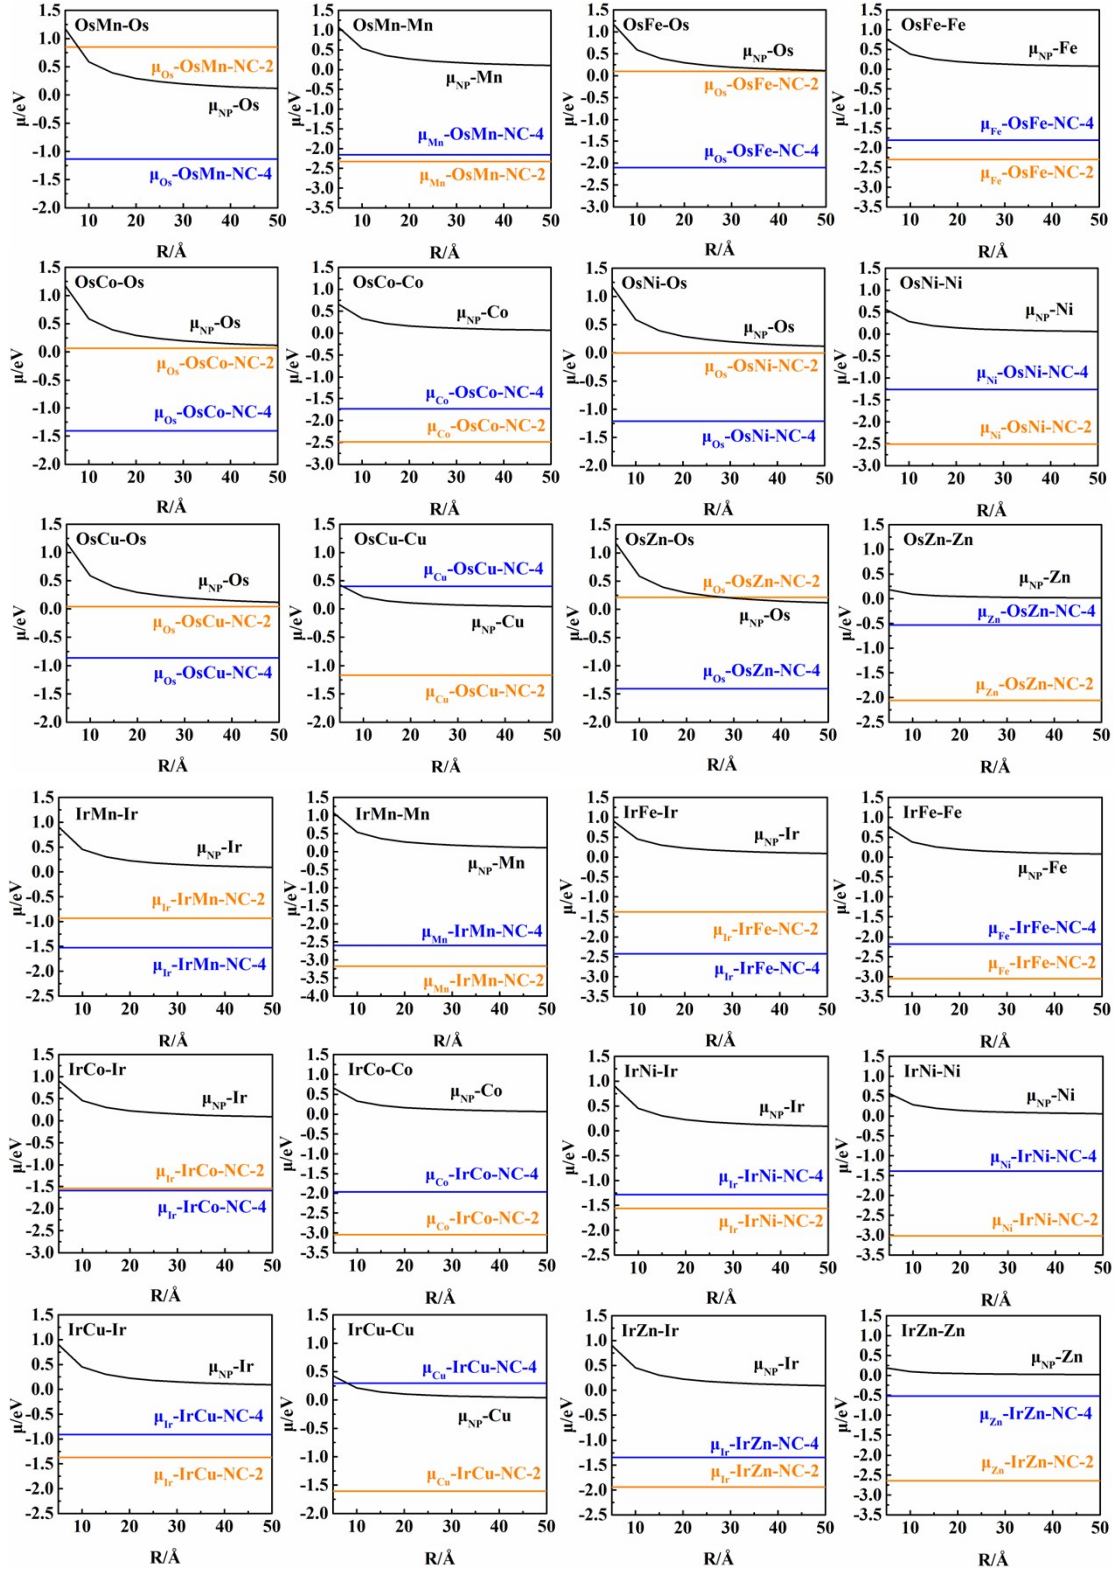

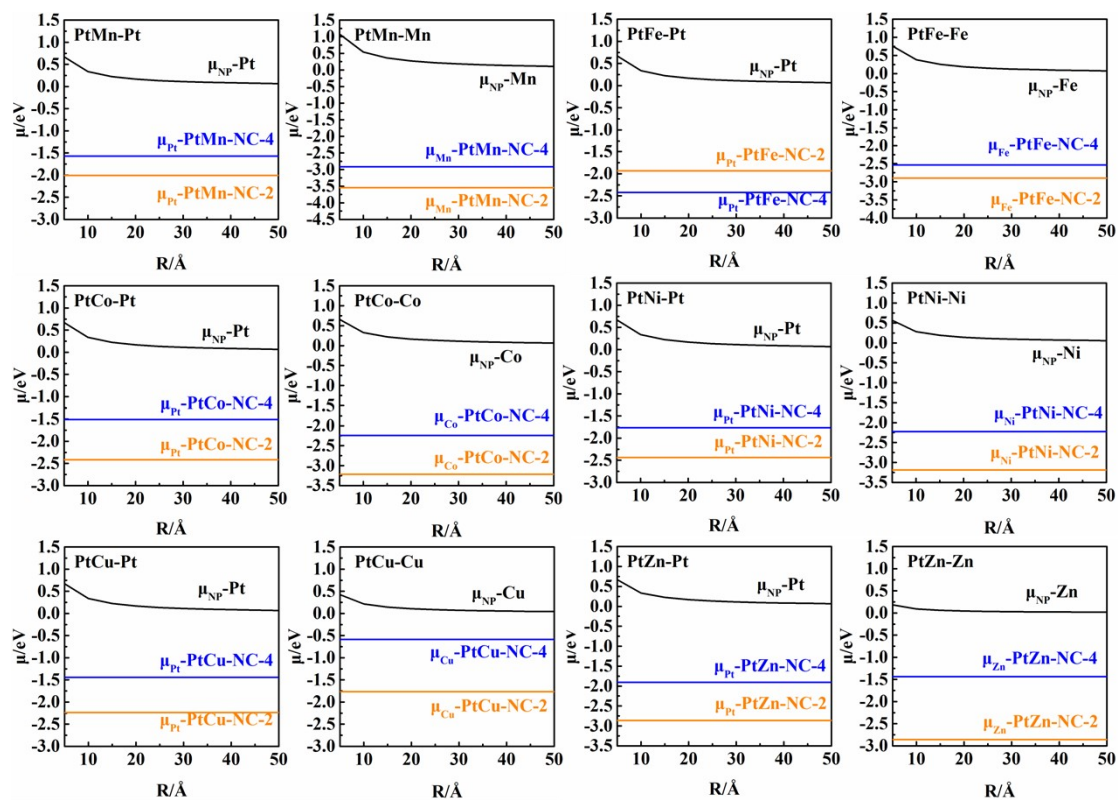

Figure S12. Chemical potential of NPs and single atom of 3d-5d BACs in vacuum.

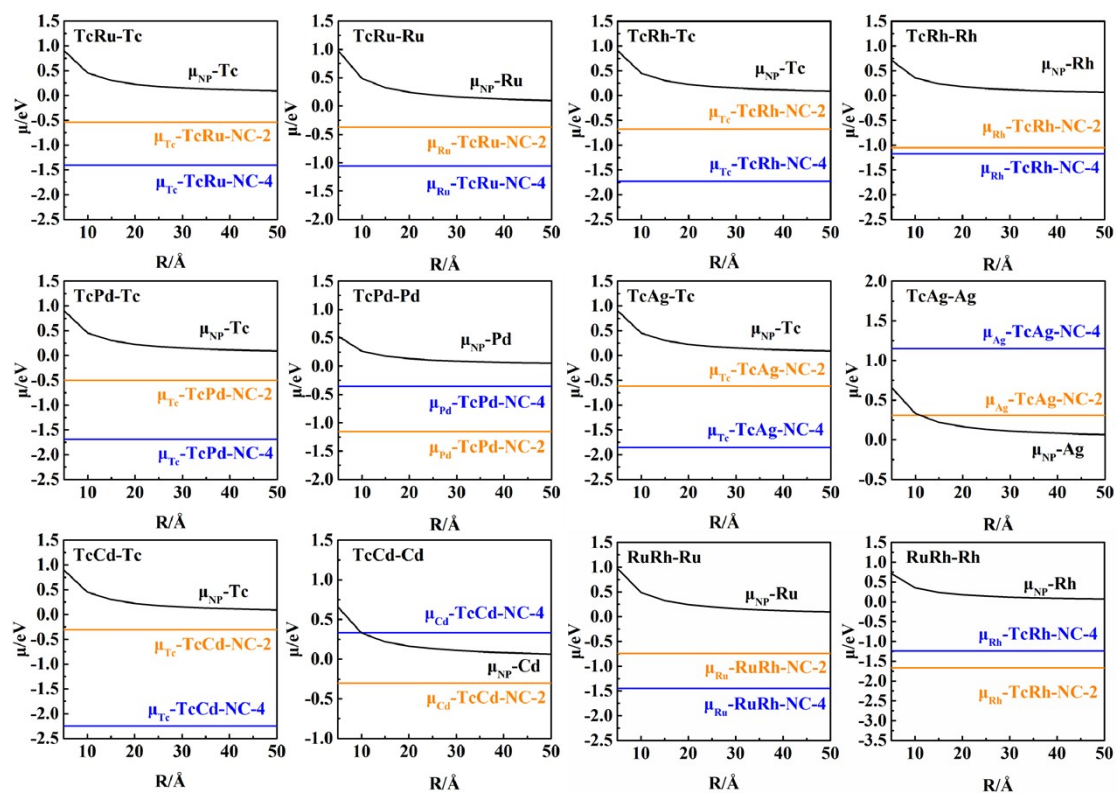

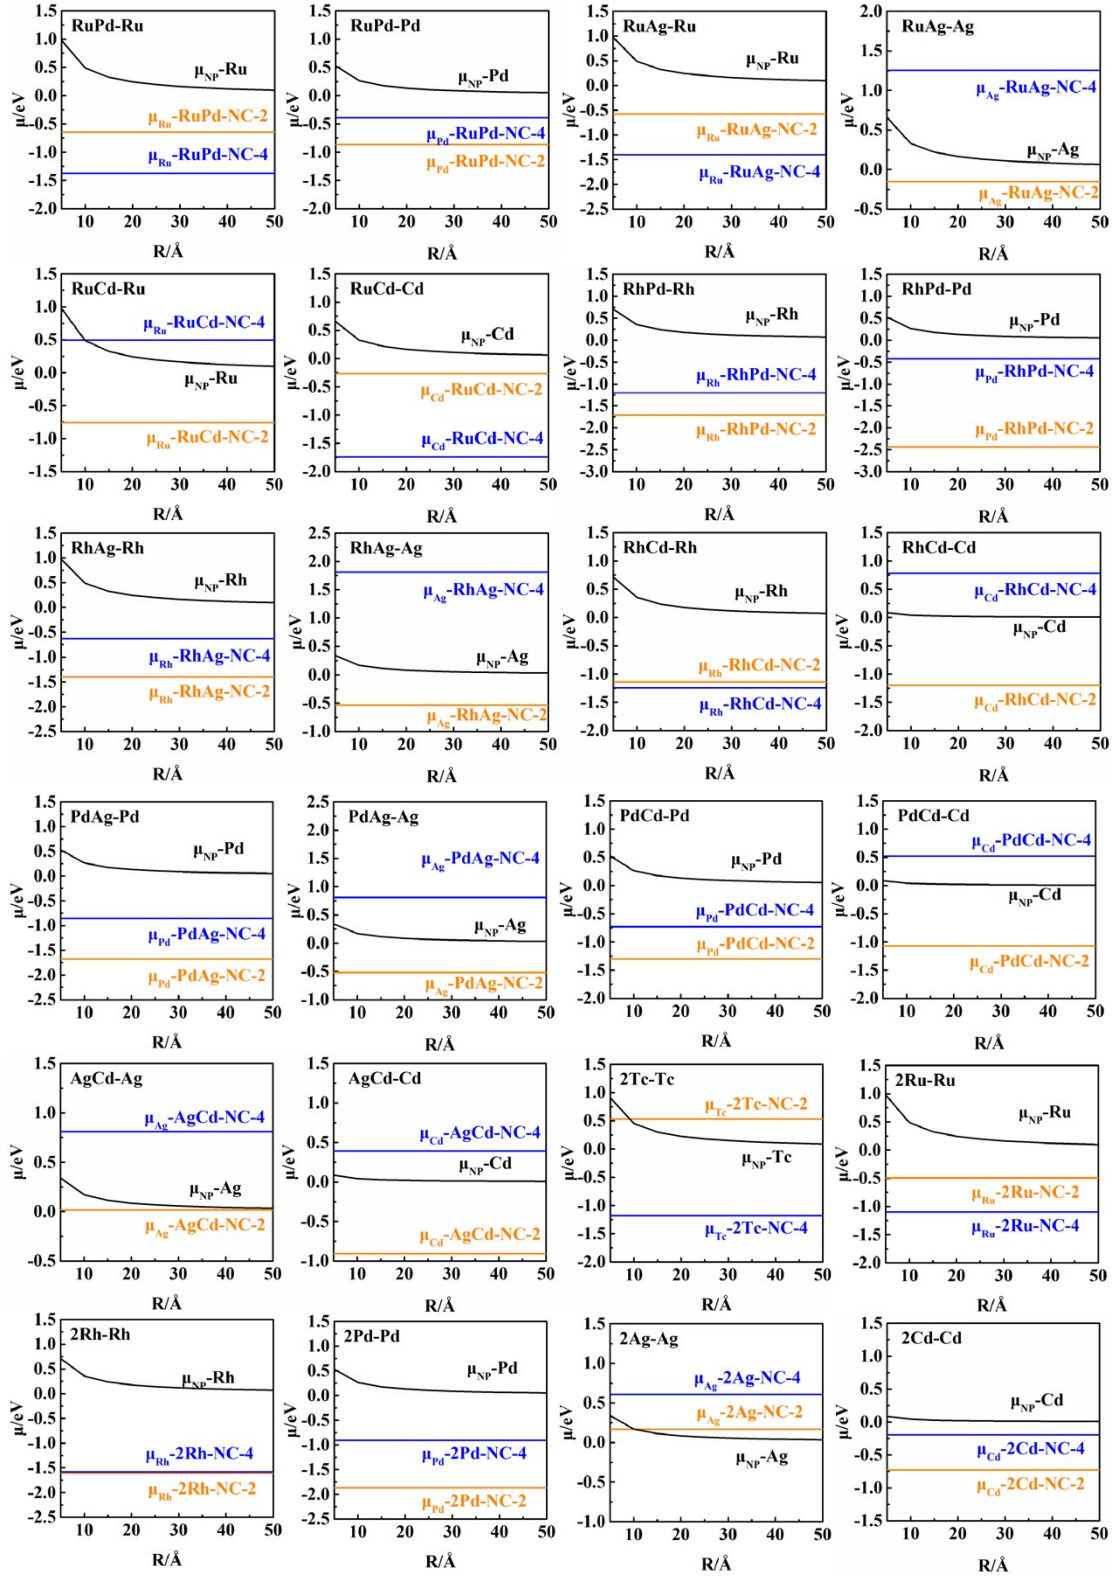

**Figure S13.** Chemical potential of NPs and single atom of 4d-4d BACs in vacuum.



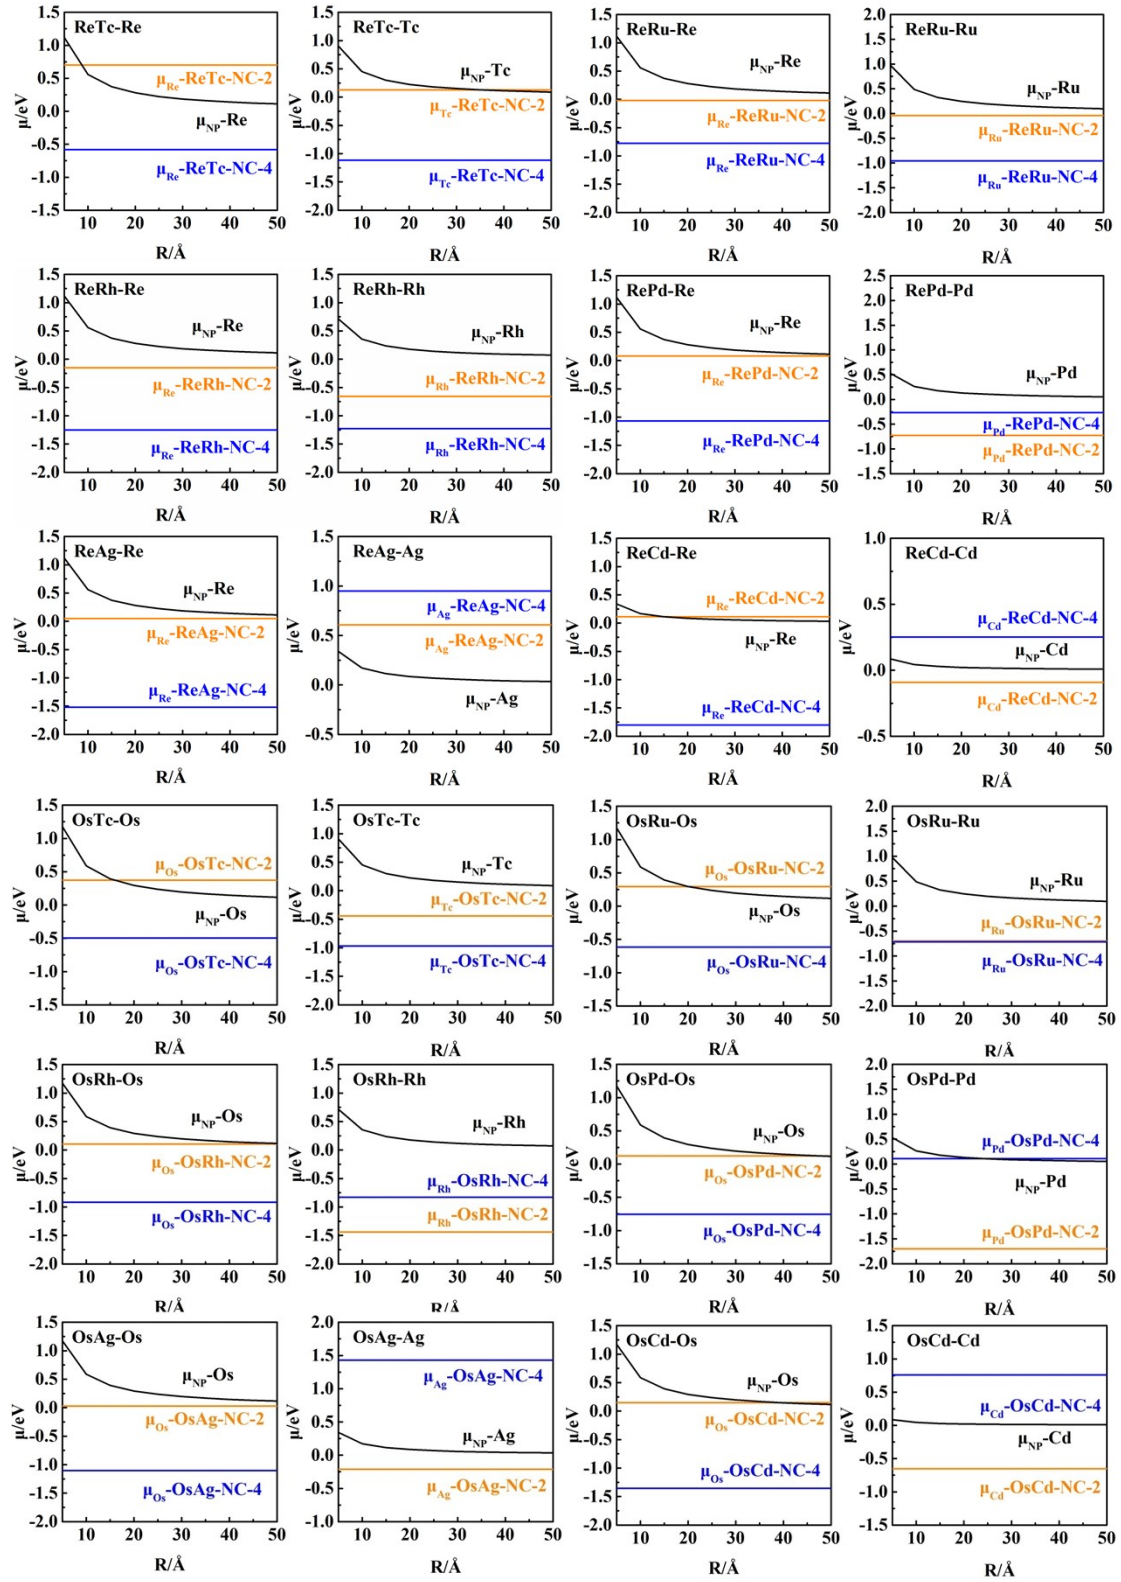

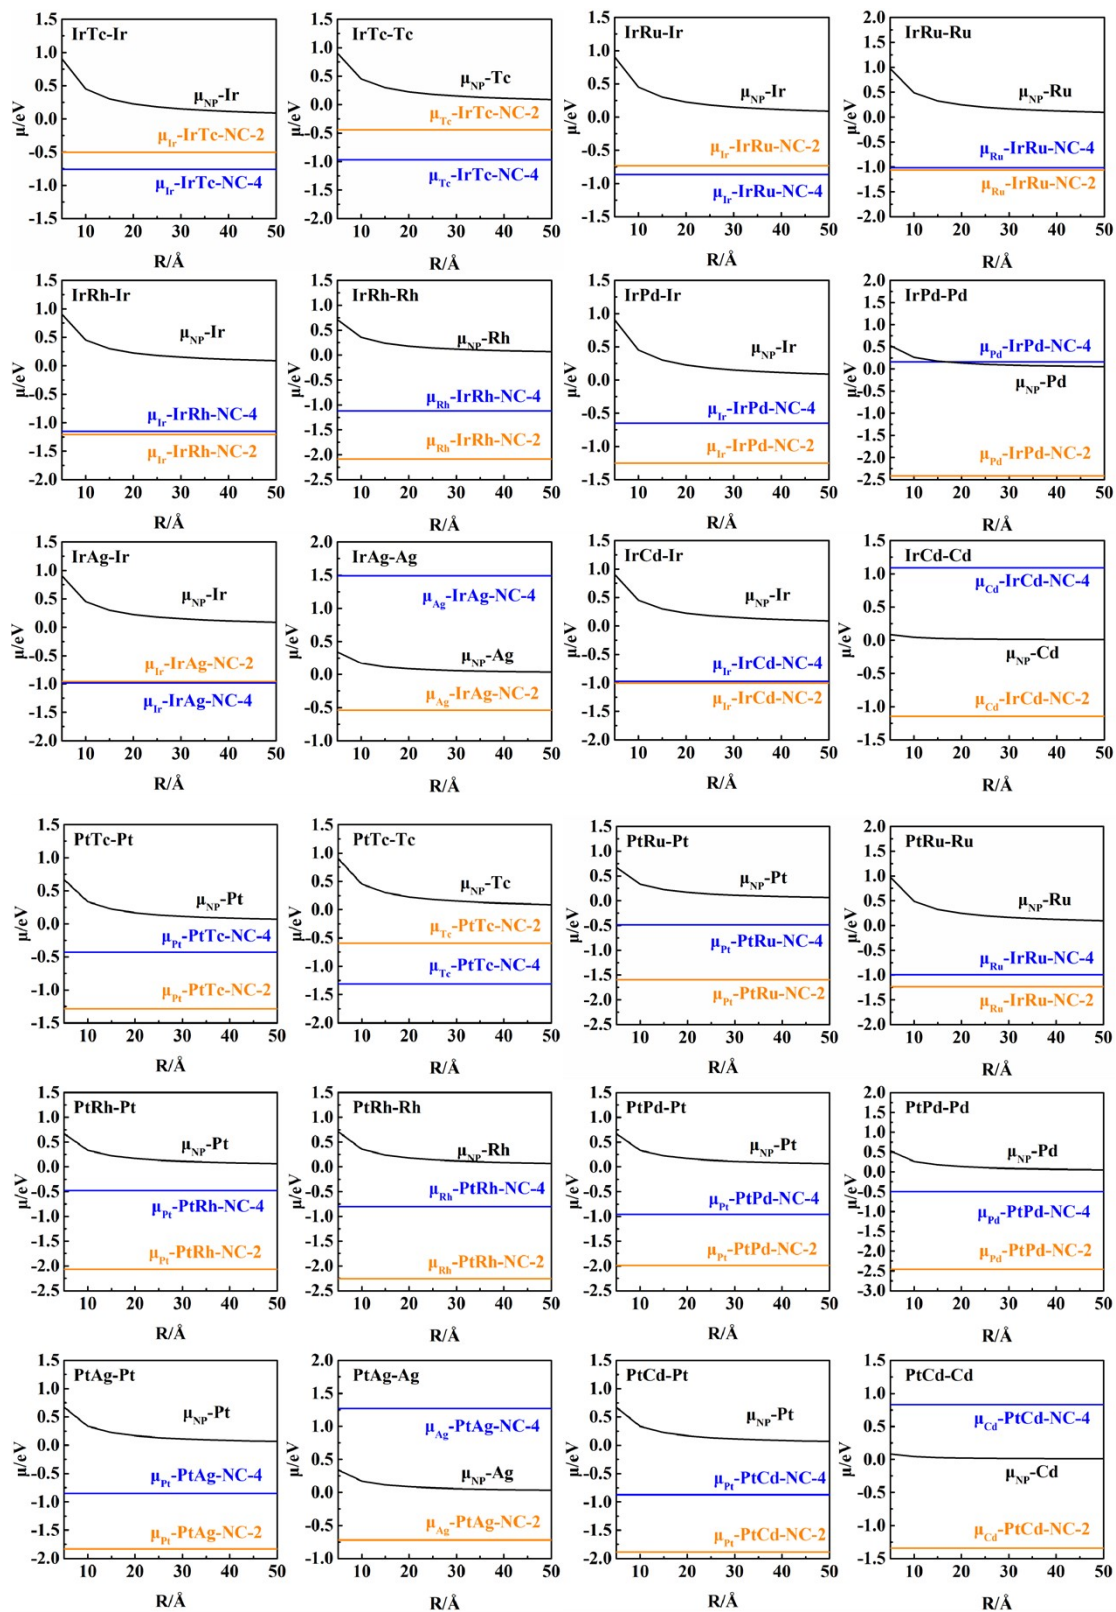

**Figure S14.** Chemical potential of NPs and single atom of 4d-5d BACs in vacuum.

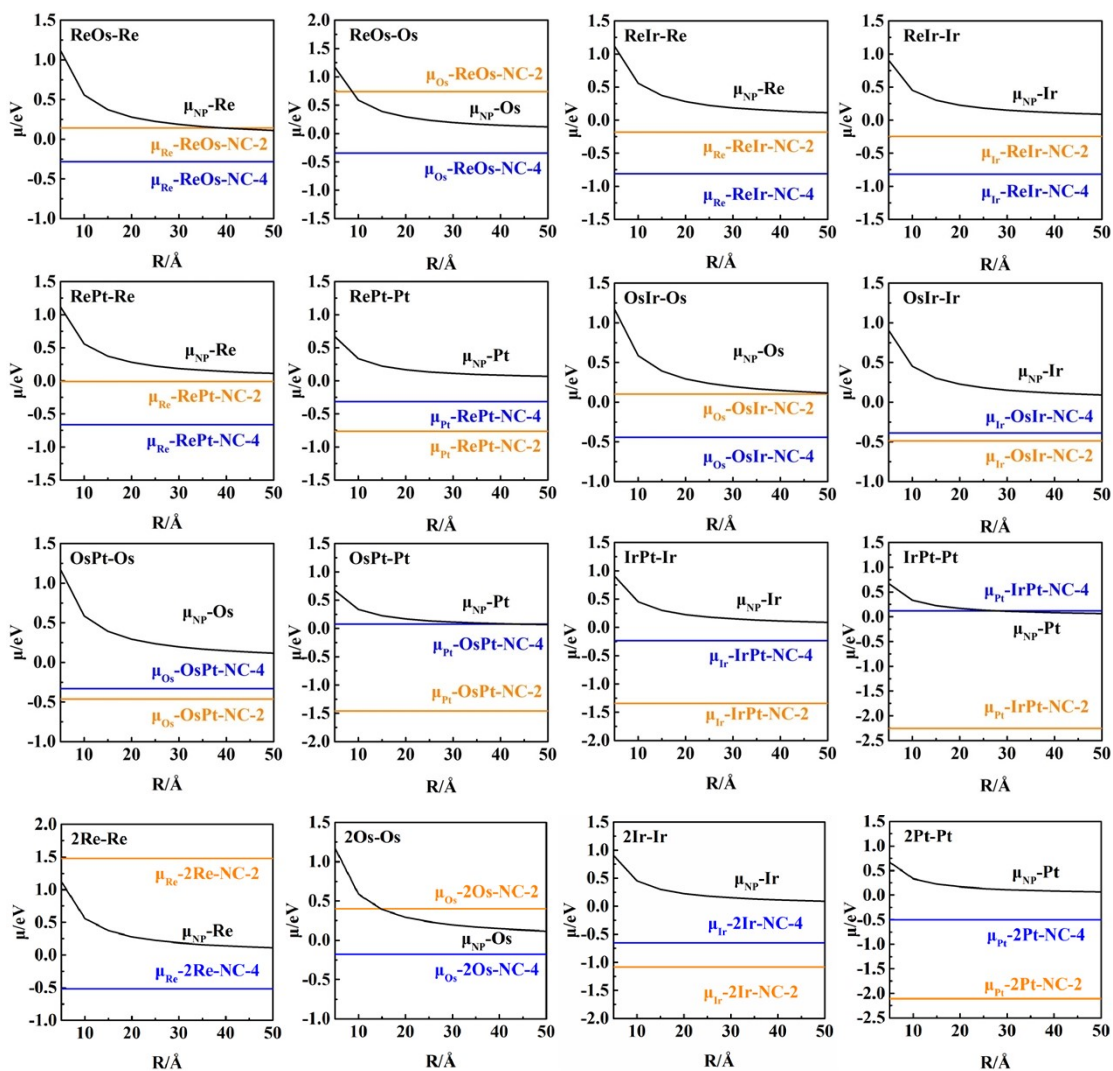

**Figure S15.** Chemical potential of NPs and single atom of 5d-5d BACs in vacuum.

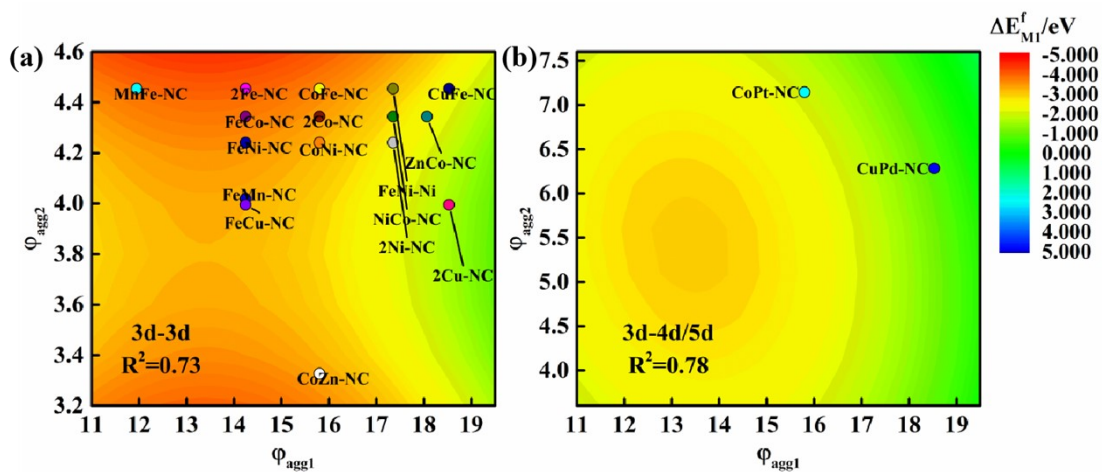

**Figure S16.** Computed the  $\Delta E_{SA}^f$  versus  $\phi_{agg1}$  and  $\phi_{agg2}$  for 3d-3d(a) and 3d-4d/5d(b)  $M_1M_2$ -NC-4.

The aggregated metal atoms are  $M_1$  atom. The experimentally stable BACs were marked in this figure.

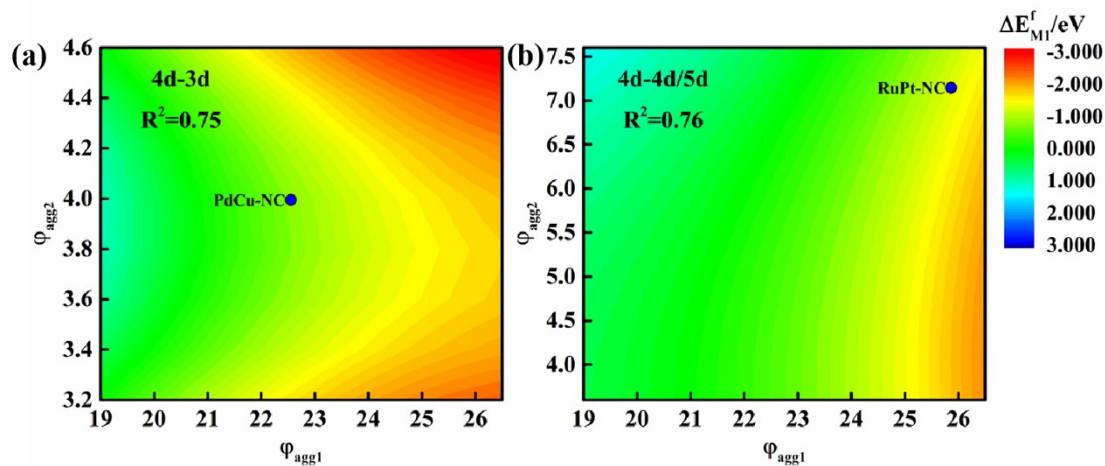

**Figure S17.** Computed the  $\Delta E_{SA}^f$  versus  $\phi_{agg1}$  and  $\phi_{agg2}$  for 4d-3d (a) and 4d-4d/5d (b)  $M_1M_2$ -NC-4. The aggregated metal atoms are  $M_1$  atom, and the experimentally stable BACs were marked in this figure.

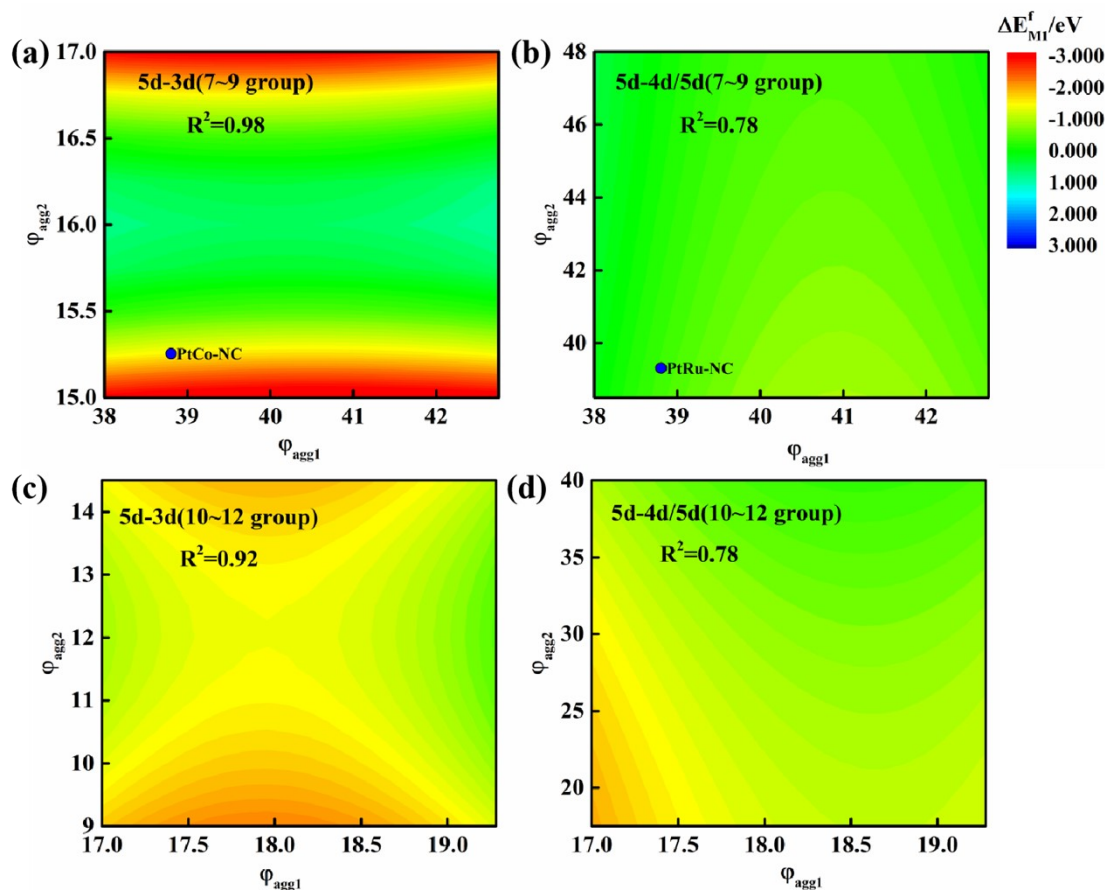

**Figure S18.** Computed the  $\Delta E_{SA}^f$  versus  $\phi_{agg1}$  and  $\phi_{agg2}$  for 5d  $M_1M_2$ -NC. (a~b) the transition metal atoms of the 7~9 group serve as  $M_2$  metal atoms for 5d-3d(a) and 5d-4d/5d(b). (c~d) the transition

metal atoms of the 10~12 group serve as  $M_2$  metal atoms for 5d-3d(c) and 5d-4d/5d(d). The aggregated metal atoms are  $M_1$  atom, and the experimentally stable BACs were marked in this figure.

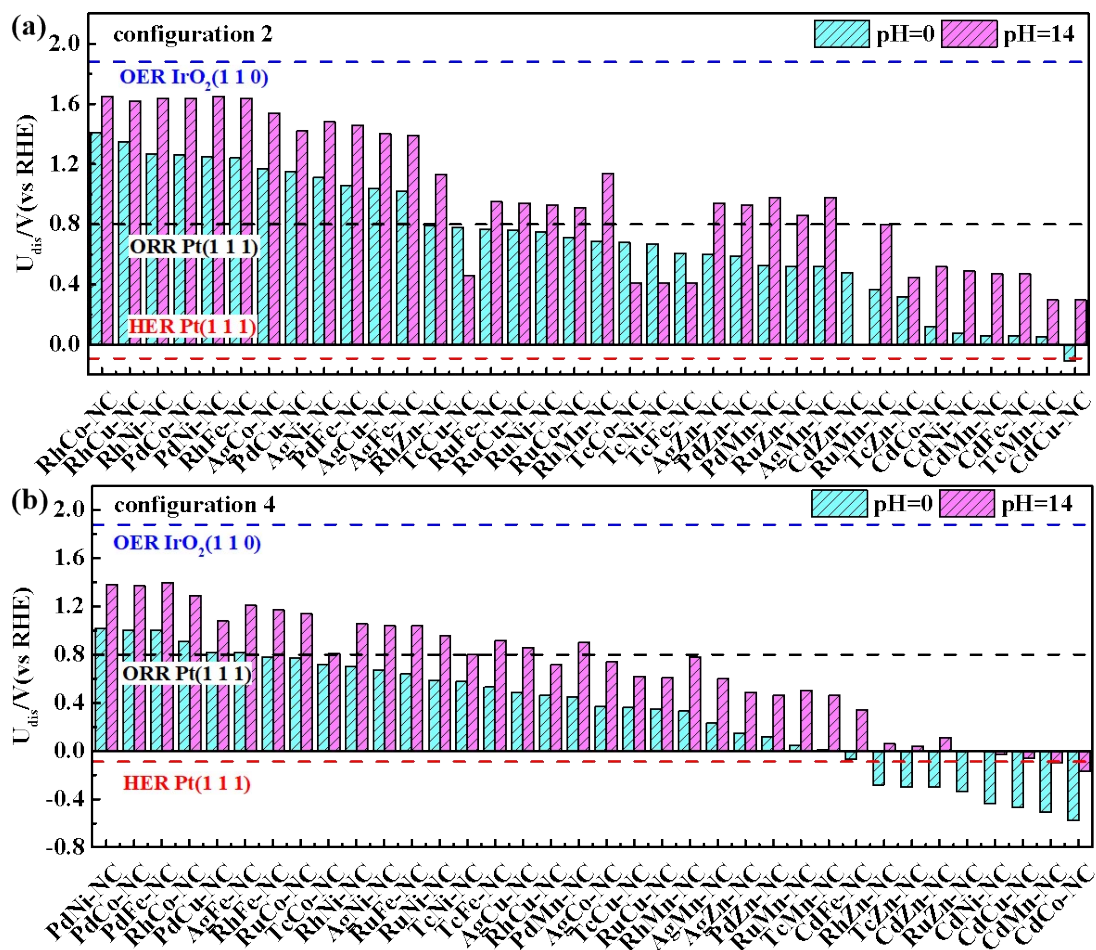

**Figure S19.** The dissociation potentials  $U_{\text{dis}}$  (vs RHE) for 3d-4d  $M_1M_2\text{-NC}$  of configuration 2 (a) and 4 (b) at pH = 0 and pH = 14. The dash line represents the theoretical working voltage of commercial catalysts for various electrocatalytic reactions, including OER, ORR and HER<sup>7</sup>.

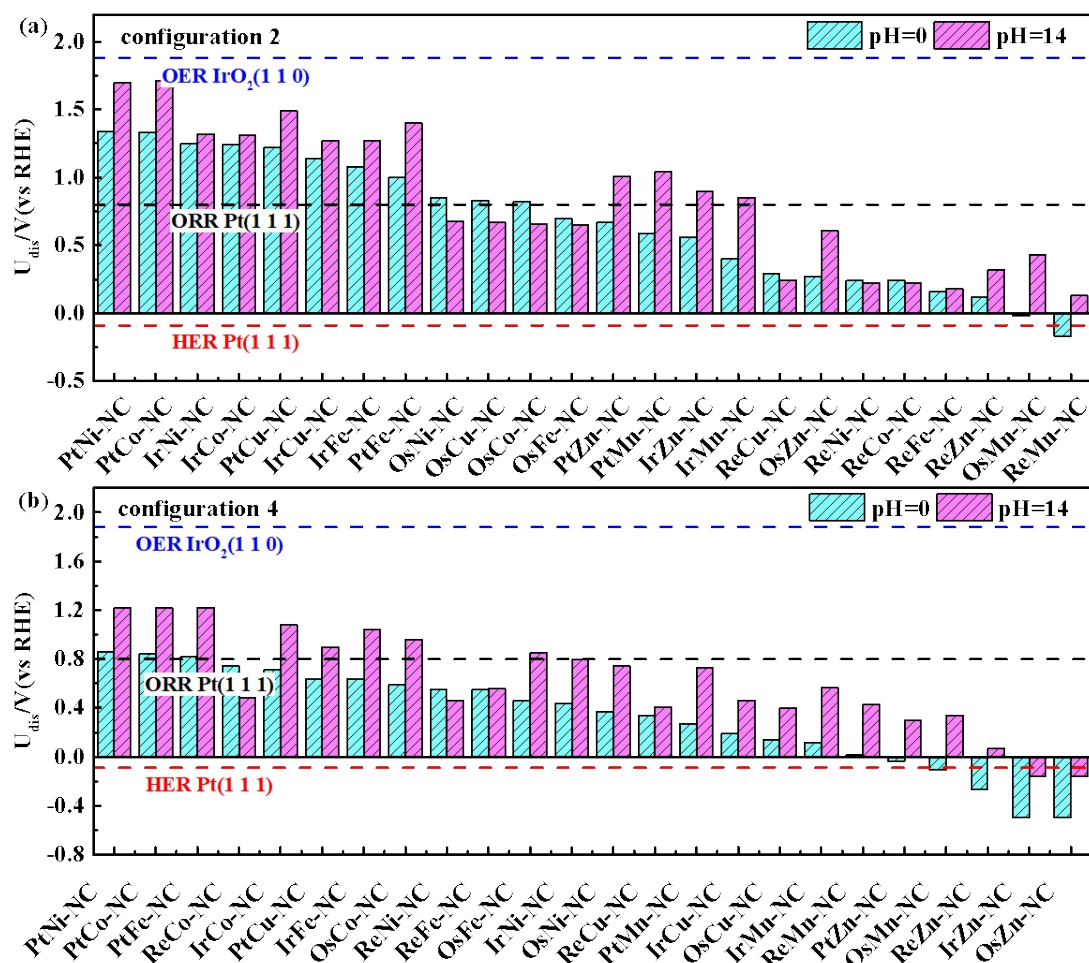

**Figure S20.** The dissociation potentials  $U_{\text{dis}}$  (vs RHE) for 3d-5d  $M_1M_2$ -NC of configuration 2 (a) and 4 (b) at pH = 0 and pH = 14. The dash line represents the theoretical working voltage of commercial catalysts for various electrocatalytic reactions, including OER, ORR and HER<sup>7</sup>.

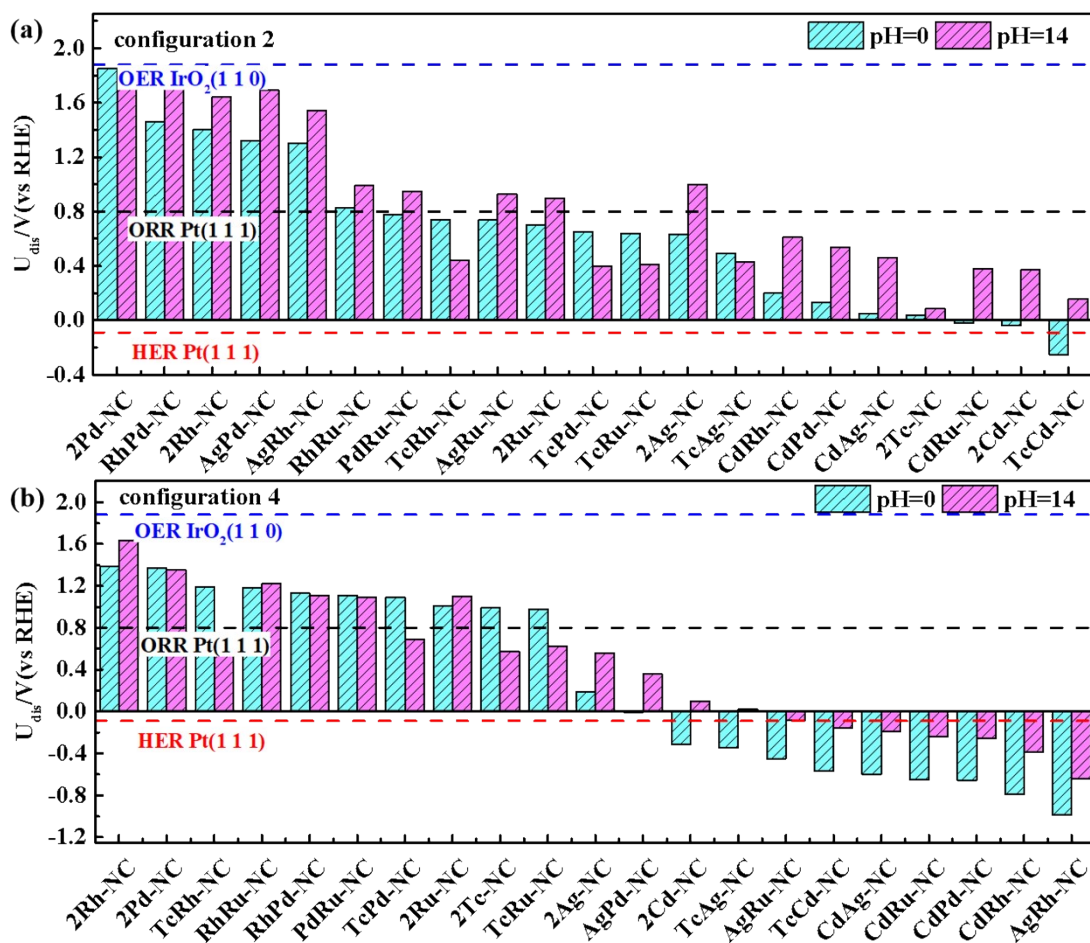

**Figure S21.** The dissociation potentials  $U_{\text{dis}}$  (vs RHE) for 4d-4d  $M_1M_2\text{-NC}$  of configuration 2 (a) and 4 (b) at pH = 0 and pH = 14. The dash line represents the theoretical working voltage of commercial catalysts for various electrocatalytic reactions, including OER, ORR and HER<sup>7</sup>.

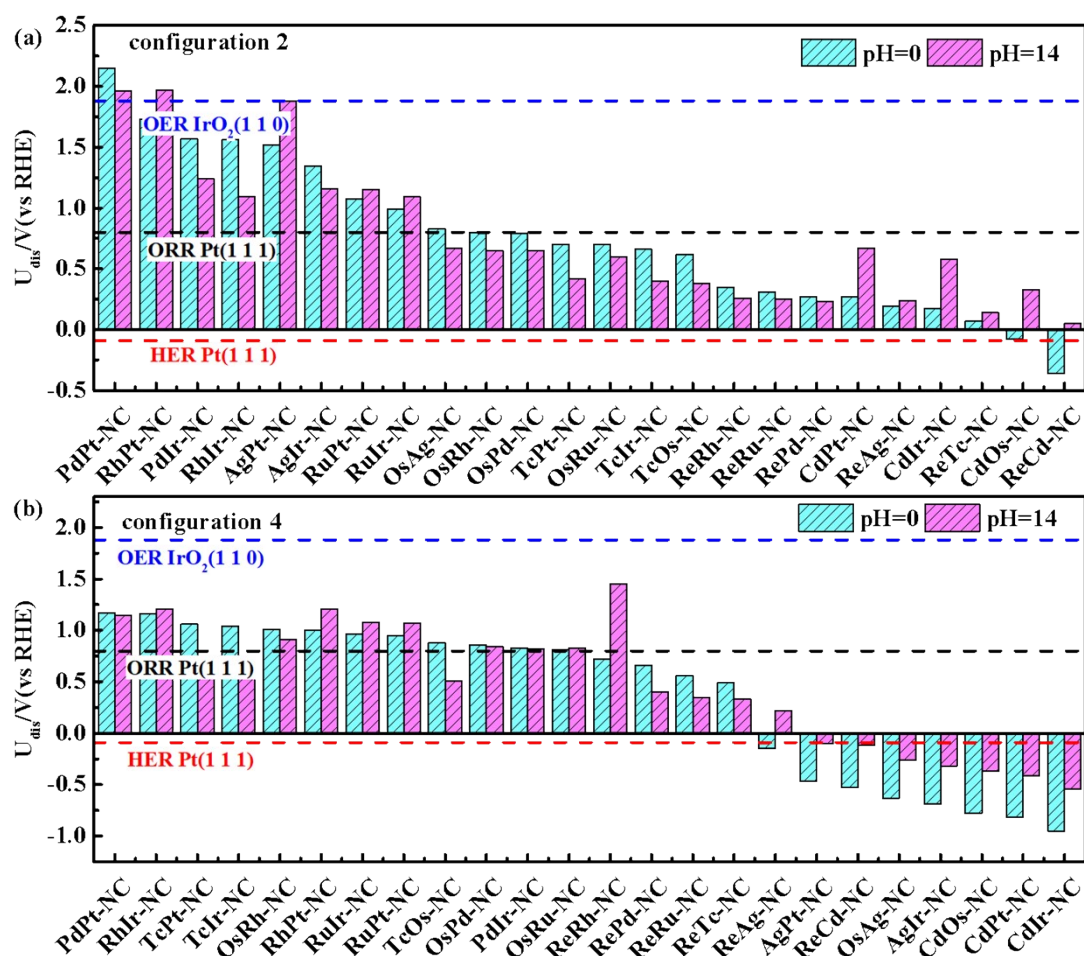

**Figure S22.** The dissociation potentials  $U_{\text{dis}}$  (vs RHE) for 4d-5d  $M_1M_2\text{-NC}$  of configuration 2 (a) and 4 (b) at pH = 0 and pH = 14. The dash line represents the theoretical working voltage of commercial catalysts for various electrocatalytic reactions, including OER, ORR and HER<sup>7</sup>.

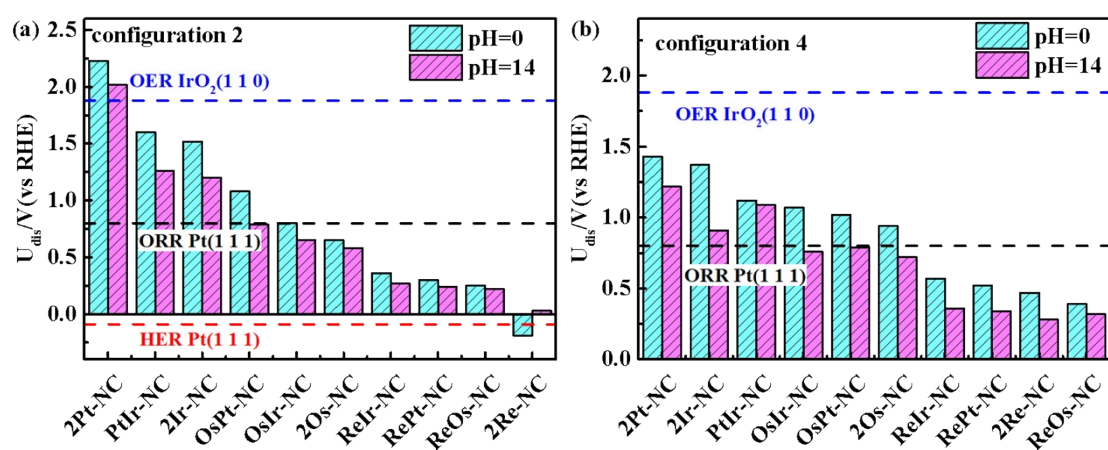

**Figure S23.** The dissociation potentials  $U_{\text{dis}}$  (vs RHE) for 5d-5d  $M_1M_2\text{-NC}$  of configuration 2 (a) and 4 (b) at pH = 0 and pH = 14. The dash line represents the theoretical working voltage of commercial catalysts for various electrocatalytic reactions, including OER, ORR and HER<sup>7</sup>.



## Supplementary References

1. G. Kresse and J. Furthmüller, *Phys. Rev. B*, 1996, **54**, 11169-11186.
2. G. Kresse and J. Furthmüller, *Comp. Mater. Sci.*, 1996, **6**, 0-50.
3. C. Rostgaard, *Physics*, 2009, **62**, 11556-11570.
4. P. E. Blöchl, *Phys. Rev. B*, 1994, **50**, 17953-17979.
5. S. Grimme, J. Antony, S. Ehrlich and H. Krieg, *J. Chem. Phys.*, 2010, **132**, 154104.
6. S. L. Dudarev, G. A. Botton, S. Y. Savrasov, C. J. Humphreys and A. P. Sutton, *Phys. Rev. B*, 1998, **57**, 1505-1509.
7. H. X. Xu, D. J. Cheng, D. P. Cao and X. C. Zeng, *Nat. Catal.*, 2018, **1**, 339-348.
8. J. C. Liu, Y. G. Wang and J. Li, *J. Am. Chem. Soc.*, 2017, **139**, 6190-6199.
9. S. C. Parker and C. T. Campbell, *Phys. Rev. B*, 2007, **75**, 035430.
10. R. Tran, Z. H. Xu, B. Radhakrishnan, D. Winston, W. H. Sun, K. A. Persson and S. P. Ong, *Sci. Data*, 2016, **3**, 160080.
11. J. C. Liu, H. Xiao and J. Li, *J. Am. Chem. Soc.*, 2020, **142**, 3375-3383.
12. M. Pourbaix, *Atlas of Electrochemical Equilibria in Aqueous Solution*, National Association of Corrosion Engineers, Houston, Texas, 1974.
13. W. Ye, S. M. Chen, Y. Lin, L. Yang, S. J. Chen, X. S. Zheng, Z. M. Qi, C. M. Wang, R. Long, M. Chen, J. F. Zhu, P. Gao, L. Song, J. Jiang and Y. J. Xiong, *Chem*, 2019, **5**, 2865-2878.
14. M. L. Xiao, H. Zhang, Y. T. Chen, J. B. Zhu, L. Q. Gao, Z. Jin, J. J. Ge, Z. Jiang, S. L. Chen, C. P. Liu and W. Xing, *Nano Energy*, 2018, **46**, 396-403.
15. X. P. Han, X. F. Ling, D. S. Yu, D. Y. Xie, L. L. Li, S. J. Peng, C. Zhong, N. Q. Zhao, Y. D. Deng and W. B. Hu, *Adv. Mater.*, 2019, **31**, 1905622.
16. L. Zhang, R. T. Si, H. S. Liu, N. Chen, Q. Wang, K. Adair, Z. Q. Wang, J. T. Chen, Z. X. Song, J. J. Li, M. N. Banis, R. Y. Li, T. K. Sham, M. Gu, L. M. Liu, G. A. Botton and X. L. Sun, *Nat. Commun.*, 2019, **10**, 4936.
17. A. X. Guan, Z. Chen, Y. L. Quan, C. Peng, Z. Q. Wang, T.-K. Sham, C. Yang, Y. L. Ji, L. P. Qian, X. Xu and G. F. Zheng, *ACS Energy Lett.*, 2020, **5**, 1044-1053.
18. T. Ding, X. K. Liu, Z. N. Tao, T. Y. Liu, T. Chen, W. Zhang, X. Y. Shen, D. Liu, S. C. Wang, B. B. Pang, D. Wu, L. L. Cao, L. Wang, T. Liu, Y. F. Li, H. T. Sheng, M. Z. Zhu and T. Yao, *J. Am. Chem. Soc.*, 2021, **143**, 11317-11324.
19. C. Du, Y. J. Gao, H. Q. Chen, P. Li, S. Y. Zhu, J. G. Wang, Q. G. He and W. Chen, *J. Mater. Chem. A*, 2020, **8**, 16994-17001.
20. Y. D. Zhou, W. Yang, W. Utetiwabo, Y. M. Lian, X. Yin, L. Zhou, P. W. Yu, R. J. Chen and S. R. Sun, *J. Phys. Chem. Lett.*, 2020, **11**, 1404-1410.
21. W. H. Ren, X. Tan, W. F. Yang, C. Jia, S. M. Xu, K. X. Wang, S. C. Smith and C. Zhao, *Angew. Chem. Int. Ed.*, 2019, **58**, 6972-6976.
22. J. Wang, Z. Q. Huang, W. Liu, C. R. Chang, H. L. Tang, Z. J. Li, W. X. Chen, C. J. Jia, T. Yao, S. Q. Wei, Y. Wu and Y. D. Li, *J. Am. Chem. Soc.*, 2017, **139**, 17281-17284.
23. Z. Y. Lu, B. Wang, Y. F. Hu, W. Liu, Y. F. Zhao, R. O. Yang, Z. P. Li, J. Luo, B. Chi, Z. Jiang, M. S. Li, S. C. Mu, S. J. Liao, J. J. Zhang and X. L. Sun, *Angew. Chem. Int. Ed.*, 2019, **58**, 2622-2626.
24. L. L. Han, Z. H. Ren, P. F. Ou, H. Cheng, N. Rui, L. L. Lin, X. J. Liu, L. C. Zhuo,

- J. Song, J. Q. Sun, J. Luo and H. L. L. Xin, *Angew. Chem. Int. Ed.*, 2021, **60**, 345-350.
25. L. Z. Zhang, J. Fischer, Y. Jia, X. C. Yan, W. Xu, X. Y. Wang, J. Chen, D. J. Yang, H. W. Liu, L. Z. Zhuang, M. Hankel, D. J. Searles, K. K. Huang, S. H. Feng, C. L. Brown and X. D. Yao, *J. Am. Chem. Soc.*, 2018, **140**, 10757-10763.
26. J. Wang, W. Liu, G. Luo, Z. J. Li, C. Zhao, H. R. Zhang, M. Z. Zhu, Q. Xu, X. Q. Wang, C. M. Zhao, Y. T. Qu, Z. K. Yang, T. Yao, Y. F. Li, Y. Lin, Y. Wu and Y. D. Li, *Energy Environ. Sci.*, 2018, **11**, 3375-3379.
27. Z. Chen, X. B. Liao, C. L. Sun, K. N. Zhao, D. X. Ye, J. T. Li, G. Wu, J. H. Fang, H. B. Zhao and J. J. Zhang, *Appl. Catal. B Environ.*, 2021, **288**, 120021.
